# Supplementary material
Source: PubMed Central journal article supplement (PMC5327789)

*Supporting Information for*

**Nanomolar Antimalarial Agents against Chloroquine-Resistant *Plasmodium falciparum* from Medicinal Plants and their Structure-Activity Relationships**

Bin Zhou,<sup>†</sup> Yan Wu,<sup>†</sup> Seema Dalal,<sup>‡</sup> Emilio F. Merino,<sup>‡</sup> Qun-Fang Liu,<sup>†</sup> Cheng-Hui Xu,<sup>†</sup> Tao Yuan,<sup>†</sup> Jian Ding,<sup>†</sup> David G. I. Kingston,<sup>§</sup> Maria B. Cassera,<sup>‡</sup> and Jian-Min Yue<sup>\*,†</sup>

<sup>†</sup>State Key Laboratory of Drug Research, Shanghai Institute of Materia Medica, Chinese Academy of Sciences, 555 Zuchongzhi Road, Shanghai 201203; University of Chinese Academy of Sciences, No.19A Yuquan Road, Beijing 100049, People's Republic of China

<sup>‡</sup>Department of Biochemistry, <sup>§</sup>Department of Chemistry and the Virginia Tech Center for Drug Discovery, MC 0308/0212, Virginia Tech, Blacksburg, Virginia 24061, United States

\* E-mail: [jmyue@simm.ac.cn](mailto:jmyue@simm.ac.cn)

## Content

|                                                                                                   |    |
|---------------------------------------------------------------------------------------------------|----|
| Table S1 The purities of compounds <b>1–44</b> .....                                              | 1  |
| Figure S1. <sup>1</sup> H NMR spectrum of fortunilide A ( <b>1</b> ) in CDCl <sub>3</sub> .....   | 2  |
| Figure S2. <sup>13</sup> C NMR spectrum of fortunilide A ( <b>1</b> ) in CDCl <sub>3</sub> .....  | 3  |
| Figure S3. HSQC spectrum of fortunilide A ( <b>1</b> ) in CDCl <sub>3</sub> .....                 | 4  |
| Figure S4. HMBC spectrum of fortunilide A ( <b>1</b> ) in CDCl <sub>3</sub> .....                 | 5  |
| Figure S5. ROESY spectrum of fortunilide A ( <b>1</b> ) in CDCl <sub>3</sub> .....                | 6  |
| Figure S6. (+)-ESIMS of fortunilide A ( <b>1</b> ) .....                                          | 7  |
| Figure S7. (–)-ESIMS of fortunilide A ( <b>1</b> ) .....                                          | 8  |
| Figure S8. (+)-HRESIMS of fortunilide ( <b>1</b> ) .....                                          | 9  |
| Figure S9. IR spectrum of fortunilide A ( <b>1</b> ) .....                                        | 10 |
| Figure S10. <sup>1</sup> H NMR spectrum of fortunilide B ( <b>2</b> ) in CDCl <sub>3</sub> .....  | 11 |
| Figure S11. <sup>13</sup> C NMR spectrum of fortunilide B ( <b>2</b> ) in CDCl <sub>3</sub> ..... | 12 |
| Figure S12. HSQC spectrum of fortunilide B ( <b>2</b> ) in CDCl <sub>3</sub> .....                | 13 |
| Figure S13. HMBC spectrum of fortunilide B ( <b>2</b> ) in CDCl <sub>3</sub> .....                | 14 |
| Figure S14. ROESY spectrum of fortunilide B ( <b>2</b> ) in CDCl <sub>3</sub> .....               | 15 |
| Figure S15. (+)-ESIMS of fortunilide B ( <b>2</b> ) .....                                         | 16 |
| Figure S16. (–)-ESIMS of fortunilide B ( <b>2</b> ) .....                                         | 17 |
| Figure S17. (+)-HRESIMS of fortunilide B ( <b>2</b> ) .....                                       | 18 |
| Figure S18. IR spectrum of fortunilide B ( <b>2</b> ) .....                                       | 19 |
| Figure S19. <sup>1</sup> H NMR spectrum of fortunilide C ( <b>3</b> ) in CDCl <sub>3</sub> .....  | 20 |
| Figure S20. <sup>13</sup> C NMR spectrum of fortunilide C ( <b>3</b> ) in CDCl <sub>3</sub> ..... | 21 |
| Figure S21. HSQC spectrum of fortunilide C ( <b>3</b> ) in CDCl <sub>3</sub> .....                | 22 |
| Figure S22. HMBC spectrum of fortunilide C ( <b>3</b> ) in CDCl <sub>3</sub> .....                | 23 |
| Figure S23. ROESY spectrum of fortunilide C ( <b>3</b> ) .....                                    | 24 |
| Figure S24. (+)-ESIMS spectrum of fortunilide C ( <b>3</b> ) .....                                | 25 |
| Figure S25. (–)-ESIMS spectrum of fortunilide C ( <b>3</b> ) .....                                | 26 |
| Figure S26. (+)-HRESIMS spectrum of fortunilide C ( <b>3</b> ) .....                              | 27 |
| Figure S27. IR spectrum of fortunilide C ( <b>3</b> ) .....                                       | 28 |
| Figure S28. <sup>1</sup> H NMR spectrum of fortunilide D ( <b>4</b> ) in CDCl <sub>3</sub> .....  | 29 |
| Figure S29. <sup>13</sup> C NMR spectrum of fortunilide D ( <b>4</b> ) in CDCl <sub>3</sub> ..... | 30 |
| Figure S30. HSQC spectrum of fortunilide D ( <b>4</b> ) in CDCl <sub>3</sub> .....                | 31 |
| Figure S31. HMBC spectrum of fortunilide D ( <b>4</b> ) in CDCl <sub>3</sub> .....                | 32 |
| Figure S32. ROESY spectrum of fortunilide D ( <b>4</b> ) .....                                    | 33 |
| Figure S33. (+)-ESIMS spectrum of fortunilide D ( <b>4</b> ) .....                                | 34 |
| Figure S34. (–)-ESIMS spectrum of fortunilide D ( <b>4</b> ) .....                                | 35 |
| Figure S35. (+)-HRESIMS spectrum of fortunilide D ( <b>4</b> ) .....                              | 36 |
| Figure S36. IR spectrum of fortunilide D ( <b>4</b> ) .....                                       | 37 |
| Figure S37. <sup>1</sup> H NMR spectrum of fortunilide E ( <b>5</b> ) in CDCl <sub>3</sub> .....  | 38 |
| Figure S38. <sup>13</sup> C NMR spectrum of fortunilide E ( <b>5</b> ) in CDCl <sub>3</sub> ..... | 39 |
| Figure S39. HSQC spectrum of fortunilide E ( <b>5</b> ) in CDCl <sub>3</sub> .....                | 40 |
| Figure S40. HMBC spectrum of fortunilide E ( <b>5</b> ) in CDCl <sub>3</sub> .....                | 41 |
| Figure S41. ROESY spectrum of fortunilide E ( <b>5</b> ) .....                                    | 42 |

|                                                                                                     |    |
|-----------------------------------------------------------------------------------------------------|----|
| Figure S42. (+)-ESIMS spectrum of fortunilide E ( <b>5</b> ) .....                                  | 43 |
| Figure S43. (-)-ESIMS spectrum of fortunilide E ( <b>5</b> ) .....                                  | 44 |
| Figure S44. (+)-HRESIMS spectrum of fortunilide E ( <b>5</b> ) .....                                | 45 |
| Figure S45. IR spectrum of fortunilide E ( <b>5</b> ) .....                                         | 46 |
| Figure S46. <sup>1</sup> H NMR spectrum of fortunilide F ( <b>6</b> ) in CD <sub>3</sub> OD .....   | 56 |
| Figure S47. <sup>13</sup> C NMR spectrum of fortunilide F ( <b>6</b> ) in CD <sub>3</sub> OD .....  | 57 |
| Figure S48. HSQC spectrum of fortunilide F ( <b>6</b> ) in CD <sub>3</sub> OD .....                 | 58 |
| Figure S49. HMBC spectrum of fortunilide F ( <b>6</b> ) in CD <sub>3</sub> OD .....                 | 59 |
| Figure S50. ROESY spectrum of fortunilide F ( <b>6</b> ) .....                                      | 60 |
| Figure S51. (+)-ESIMS spectrum of fortunilide F ( <b>6</b> ) .....                                  | 61 |
| Figure S52. (-)-ESIMS spectrum of fortunilide F ( <b>6</b> ) .....                                  | 62 |
| Figure S53. (+)-HRESIMS spectrum of fortunilide F ( <b>6</b> ) .....                                | 63 |
| Figure S54. IR spectrum of fortunilide F ( <b>6</b> ) .....                                         | 64 |
| Figure S55. <sup>1</sup> H NMR spectrum of fortunilide G ( <b>7</b> ) in CDCl <sub>3</sub> .....    | 47 |
| Figure S56. <sup>13</sup> C NMR spectrum of fortunilide G ( <b>7</b> ) in CDCl <sub>3</sub> .....   | 48 |
| Figure S57. HSQC spectrum of fortunilide G ( <b>7</b> ) in CDCl <sub>3</sub> .....                  | 49 |
| Figure S58. HMBC spectrum of fortunilide G ( <b>7</b> ) in CDCl <sub>3</sub> .....                  | 50 |
| Figure S59. ROESY spectrum of fortunilide G ( <b>7</b> ) .....                                      | 51 |
| Figure S60. (+)-ESIMS spectrum of fortunilide G ( <b>7</b> ) .....                                  | 52 |
| Figure S61. (-)-ESIMS spectrum of fortunilide G ( <b>7</b> ) .....                                  | 53 |
| Figure S62. (+)-HRESIMS spectrum of fortunilide G ( <b>7</b> ) .....                                | 54 |
| Figure S63. IR spectrum of fortunilide G ( <b>7</b> ) .....                                         | 55 |
| Figure S64. <sup>1</sup> H NMR spectrum of fortunilide H ( <b>8</b> ) in CDCl <sub>3</sub> .....    | 65 |
| Figure S65. <sup>13</sup> C NMR spectrum of fortunilide H ( <b>8</b> ) in CDCl <sub>3</sub> .....   | 66 |
| Figure S66. HSQC spectrum of fortunilide H ( <b>8</b> ) in CDCl <sub>3</sub> .....                  | 67 |
| Figure S67. HMBC spectrum of fortunilide H ( <b>8</b> ) in CDCl <sub>3</sub> .....                  | 68 |
| Figure S68. ROESY spectrum of fortunilide H ( <b>8</b> ) .....                                      | 69 |
| Figure S69. (+)-ESIMS spectrum of fortunilide H ( <b>8</b> ) .....                                  | 70 |
| Figure S70. (-)-ESIMS spectrum of fortunilide H ( <b>8</b> ) .....                                  | 71 |
| Figure S71. (+)-HRESIMS spectrum of fortunilide H ( <b>8</b> ) .....                                | 72 |
| Figure S72. IR spectrum of fortunilide H ( <b>8</b> ) .....                                         | 73 |
| Figure S73. <sup>1</sup> H NMR spectrum of fortunilide I ( <b>9</b> ) in CD <sub>3</sub> OD .....   | 74 |
| Figure S74. <sup>13</sup> C NMR spectrum of fortunilide I ( <b>9</b> ) in CD <sub>3</sub> OD .....  | 75 |
| Figure S75. HSQC spectrum of fortunilide I ( <b>9</b> ) in CD <sub>3</sub> OD .....                 | 76 |
| Figure S76. HMBC spectrum of fortunilide I ( <b>9</b> ) in CD <sub>3</sub> OD .....                 | 77 |
| Figure S77. ROESY spectrum of fortunilide I ( <b>9</b> ) .....                                      | 78 |
| Figure S78. (+)-ESIMS spectrum of fortunilide I ( <b>9</b> ) .....                                  | 79 |
| Figure S79. (-)-ESIMS spectrum of fortunilide I ( <b>9</b> ) .....                                  | 80 |
| Figure S80. (+)-HRESIMS spectrum of fortunilide I ( <b>9</b> ) .....                                | 81 |
| Figure S81. IR spectrum of fortunilide I ( <b>9</b> ) .....                                         | 82 |
| Figure S82. <sup>1</sup> H NMR spectrum of fortunilide J ( <b>10</b> ) in CD <sub>3</sub> OD .....  | 83 |
| Figure S83. <sup>13</sup> C NMR spectrum of fortunilide J ( <b>10</b> ) in CD <sub>3</sub> OD ..... | 84 |
| Figure S84. HSQC spectrum of fortunilide J ( <b>10</b> ) in CD <sub>3</sub> OD .....                | 85 |
| Figure S85. HMBC spectrum of fortunilide J ( <b>10</b> ) in CD <sub>3</sub> OD .....                | 86 |

|                                                                                                     |     |
|-----------------------------------------------------------------------------------------------------|-----|
| Figure S86. ROESY spectrum of fortunilide J ( <b>10</b> ) .....                                     | 87  |
| Figure S87. (+)-ESIMS spectrum of fortunilide J ( <b>10</b> ) .....                                 | 88  |
| Figure S88. (-)-ESIMS spectrum of fortunilide J ( <b>10</b> ) .....                                 | 89  |
| Figure S89. (-)-HRESIMS spectrum of fortunilide J ( <b>10</b> ).....                                | 90  |
| Figure S90. IR spectrum of fortunilide J ( <b>10</b> ) .....                                        | 91  |
| Figure S91. <sup>1</sup> H NMR spectrum of fortunilide K ( <b>11</b> ) in CDCl <sub>3</sub> .....   | 92  |
| Figure S92. <sup>13</sup> C NMR spectrum of fortunilide K ( <b>11</b> ) in CDCl <sub>3</sub> .....  | 93  |
| Figure S93. H–H COSY spectrum of fortunilide K ( <b>11</b> ) in CDCl <sub>3</sub> .....             | 94  |
| Figure S94. HSQC spectrum of fortunilide K ( <b>11</b> ) in CDCl <sub>3</sub> .....                 | 95  |
| Figure S95. HMBC spectrum of fortunilid K ( <b>11</b> ) in CDCl <sub>3</sub> .....                  | 96  |
| Figure S96. ROESY spectrum of fortunilide K ( <b>11</b> ) .....                                     | 97  |
| Figure S97. (+)-ESIMS spectrum of fortunilide K ( <b>11</b> ) .....                                 | 98  |
| Figure S98. (-)-ESIMS spectrum of fortunilide K ( <b>11</b> ) .....                                 | 99  |
| Figure S99. (+)-HRESIMS spectrum of fortunilide K ( <b>11</b> ).....                                | 100 |
| Figure S100. IR spectrum of fortunilide K ( <b>11</b> ) .....                                       | 101 |
| Figure S101. <sup>1</sup> H NMR spectrum of fortunilide L ( <b>12</b> ) in CDCl <sub>3</sub> .....  | 102 |
| Figure S102. <sup>13</sup> C NMR spectrum of fortunilide L ( <b>12</b> ) in CDCl <sub>3</sub> ..... | 103 |
| Figure S103. HSQC spectrum of fortunilide L ( <b>12</b> ) in CDCl <sub>3</sub> .....                | 104 |
| Figure S104. HMBC spectrum of fortunilid L ( <b>12</b> ) in CDCl <sub>3</sub> .....                 | 105 |
| Figure S105. ROESY spectrum of fortunilide L ( <b>12</b> ) .....                                    | 106 |
| Figure S106. (+)-ESIMS spectrum of fortunilide L ( <b>12</b> ) .....                                | 107 |
| Figure S107. (-)-ESIMS spectrum of fortunilide L ( <b>12</b> ) .....                                | 108 |
| Figure S108. (+)-HRESIMS spectrum of fortunilide L ( <b>12</b> ).....                               | 109 |
| Figure S109. IR spectrum of fortunilide L ( <b>12</b> ) .....                                       | 110 |

**Table S1 The purities of compounds 1–44**

| Comounds | Method | Retention Time (min) | Purity (%) |
|----------|--------|----------------------|------------|
| 1        | A      | 12.27                | 95.65      |
| 2        | A      | 17.35                | 98.00      |
| 3        | A      | 16.97                | 98.10      |
| 4        | A      | 12.54                | 96.99      |
| 5        | A      | 12.28                | 98.98      |
| 6        | A      | 18.74                | 94.77      |
| 7        | A      | 7.16                 | 94.79      |
| 8        | A      | 14.89                | 95.61      |
| 9        | A      | 10.35                | 97.98      |
| 10       | A      | 8.99                 | 94.56      |
| 11       | A      | 19.49                | 98.75      |
| 12       | A      | 19.19                | 98.06      |
| 13       | A      | 5.23                 | 97.74      |
| 14       | A      | 14.35                | 98.84      |
| 15       | B      | 18.84                | 99.28      |
| 16       | A      | 13.06                | 97.36      |
| 17       | A      | 15.94                | 98.96      |
| 18       | A      | 16.35                | 98.79      |
| 19       | A      | 17.35                | 96.33      |
| 20       | A      | 10.77                | 98.27      |
| 21       | A      | 10.76                | 97.87      |
| 22       | A      | 12.65                | 98.91      |
| 23       | B      | 18.99                | 96.84      |
| 24       | A      | 14.08                | 98.15      |
| 25       | A      | 19.01                | 99.06      |
| 26       | A      | 12.14                | 97.87      |
| 27       | A      | 15.24                | 98.38      |
| 28       | A      | 16.34                | 96.49      |
| 29       | A      | 16.46                | 98.30      |
| 30       | A      | 18.25                | 99.78      |
| 31       | A      | 13.15                | 97.98      |
| 32       | A      | 17.09                | 96.89      |
| 33       | A      | 17.05                | 99.02      |
| 34       | A      | 17.04                | 99.53      |
| 35       | A      | 11.71                | 95.45      |
| 36       | A      | 12.23                | 99.51      |
| 37       | A      | 9.20                 | 99.39      |
| 38       | A      | 17.06                | 98.29      |
| 39       | A      | 9.83                 | 99.36      |
| 40       | A      | 11.84                | 97.32      |
| 41       | A      | 10.15                | 95.18      |
| 42       | A      | 8.36                 | 96.68      |
| 43       | B      | 18.30                | 96.15      |
| 44       | A      | 15.46                | 96.62      |

The purities of compounds **1–44** were checked by reversed-phase HPLC, which was performed on an Agilent 1100 binary pump system with an Agilent 1100 detector (210 nm) using a YMC-Pack ODS-A (150×4.6 mm, 5- $\mu$ m).

Methods: A: 30–80% CH<sub>3</sub>CN in H<sub>2</sub>O for 20 min, 0.5 ml/min; B: 30–90% CH<sub>3</sub>CN in H<sub>2</sub>O for 20 min, 0.5 ml/min

Figure S1. <sup>1</sup>H NMR spectrum of fortunilide A (1) in CDCl<sub>3</sub>

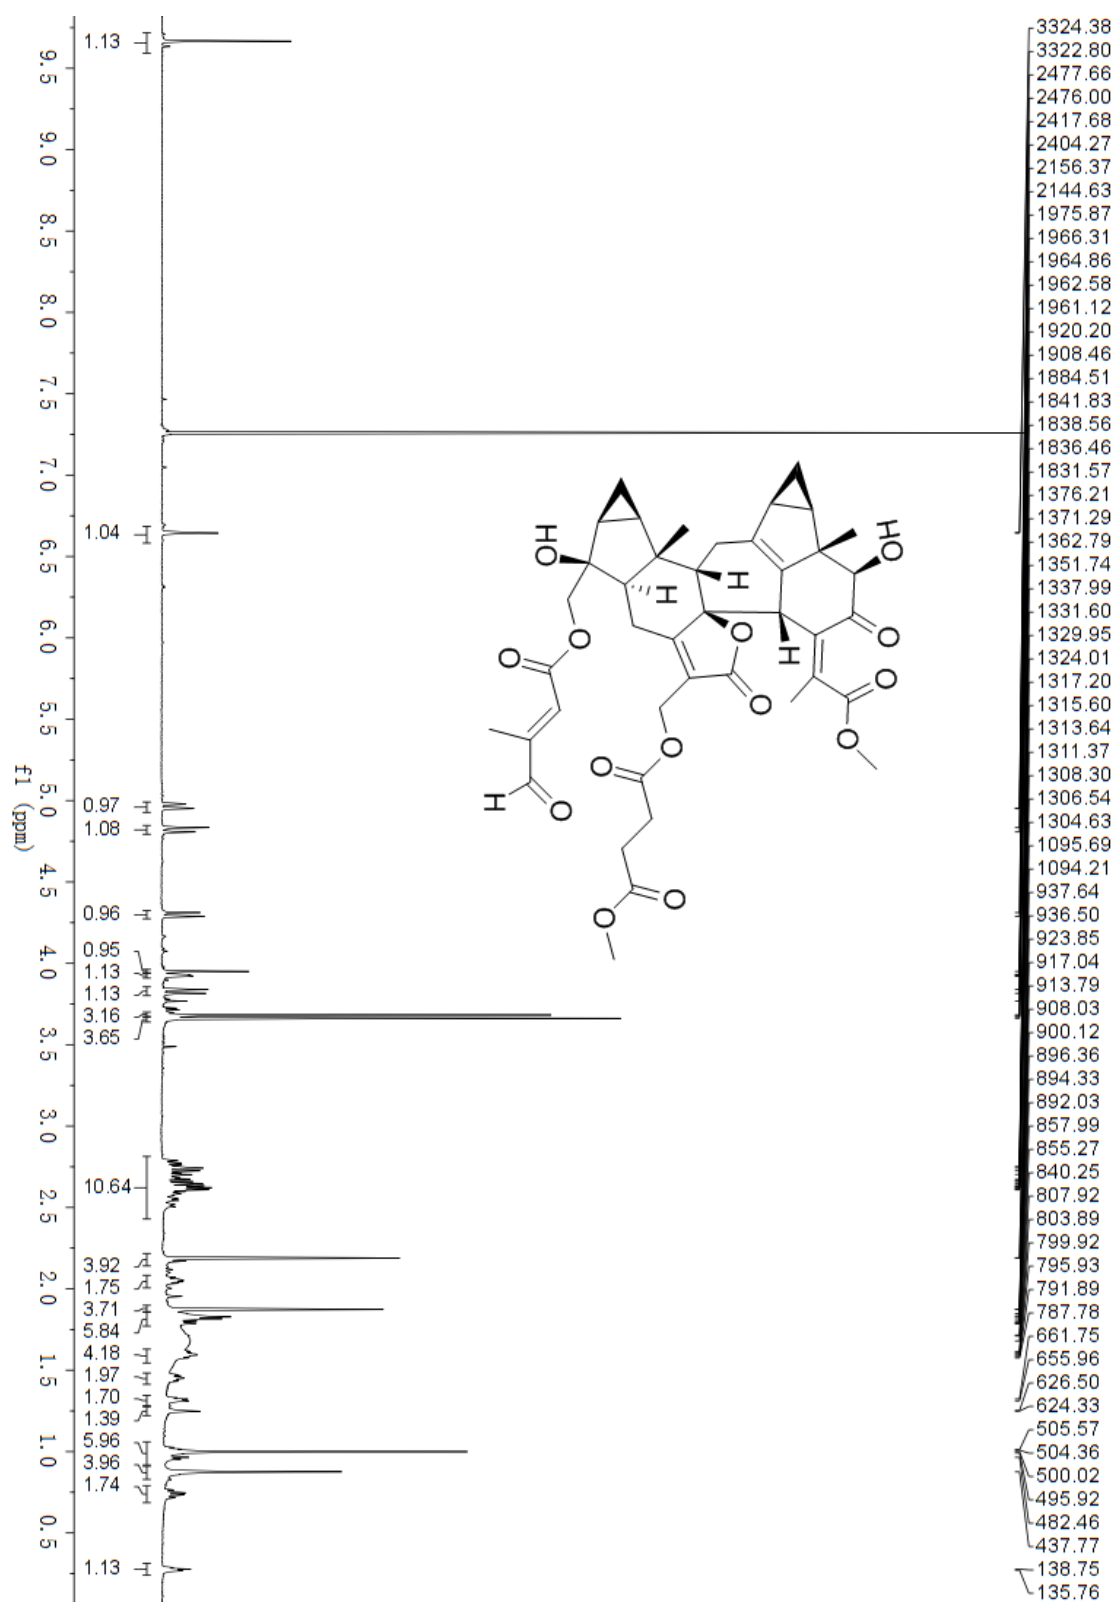

Figure S2.  $^{13}\text{C}$  NMR spectrum of fortunilide A (1) in  $\text{CDCl}_3$

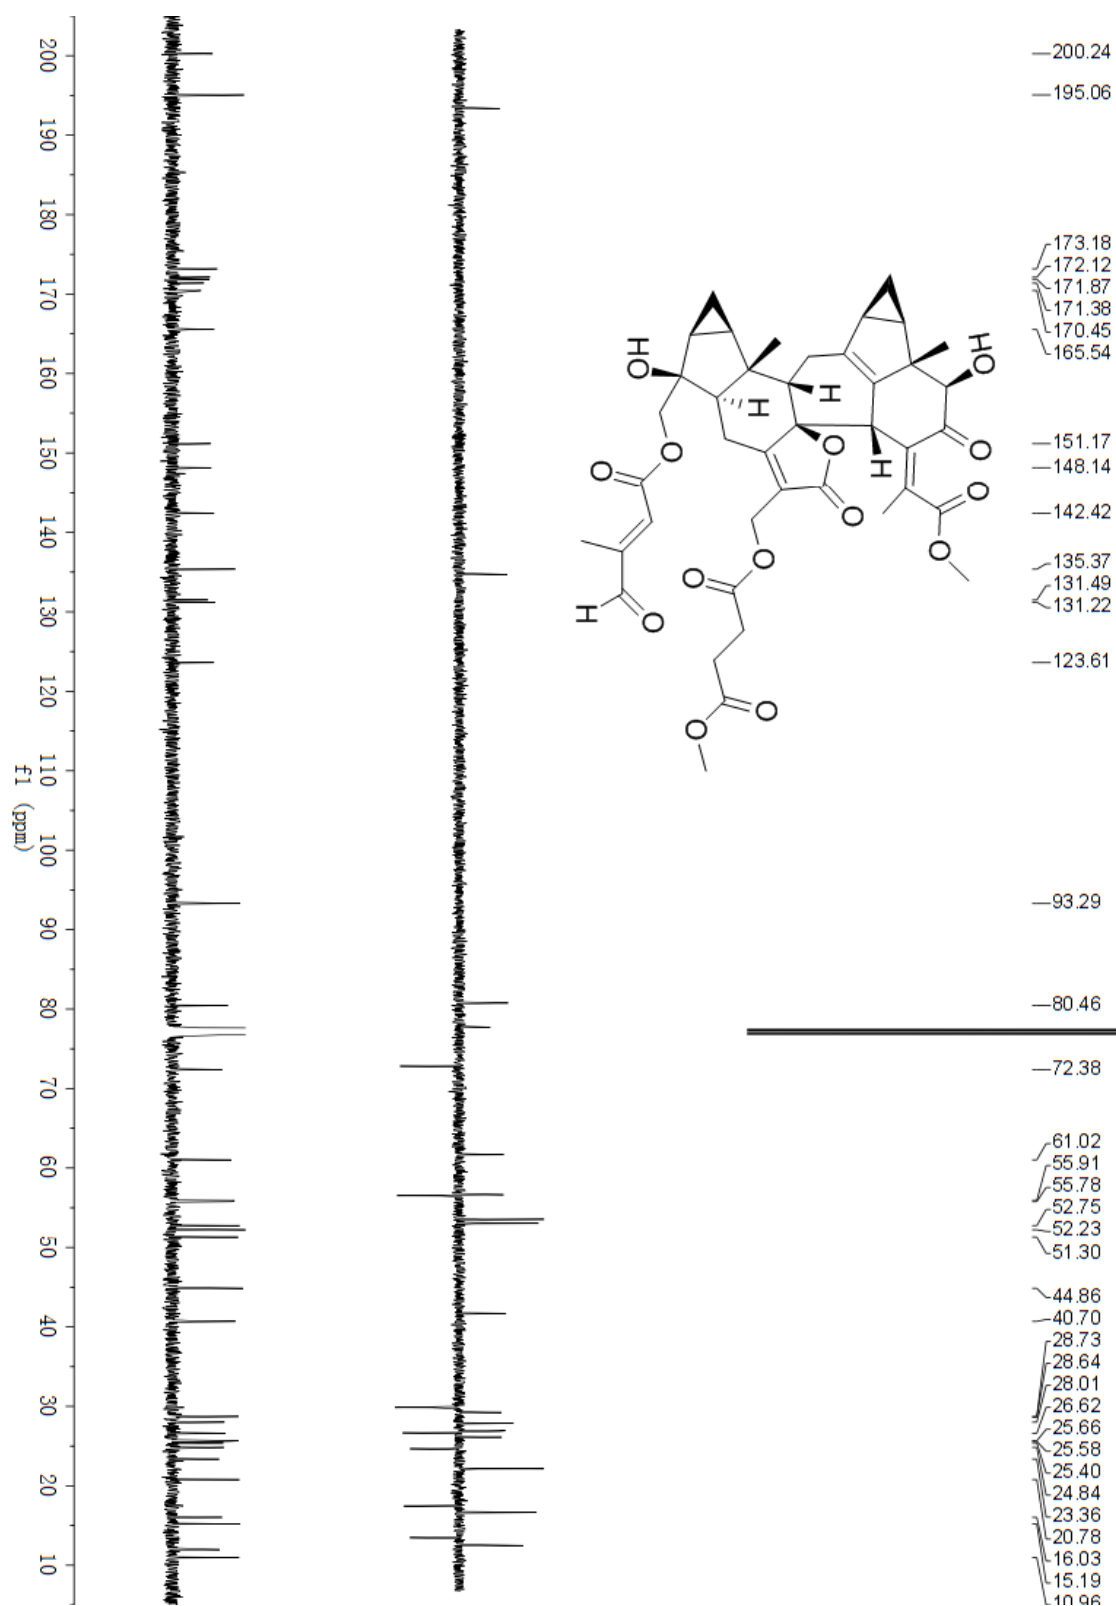

Figure S3. HSQC spectrum of fortunilide A (1) in CDCl<sub>3</sub>

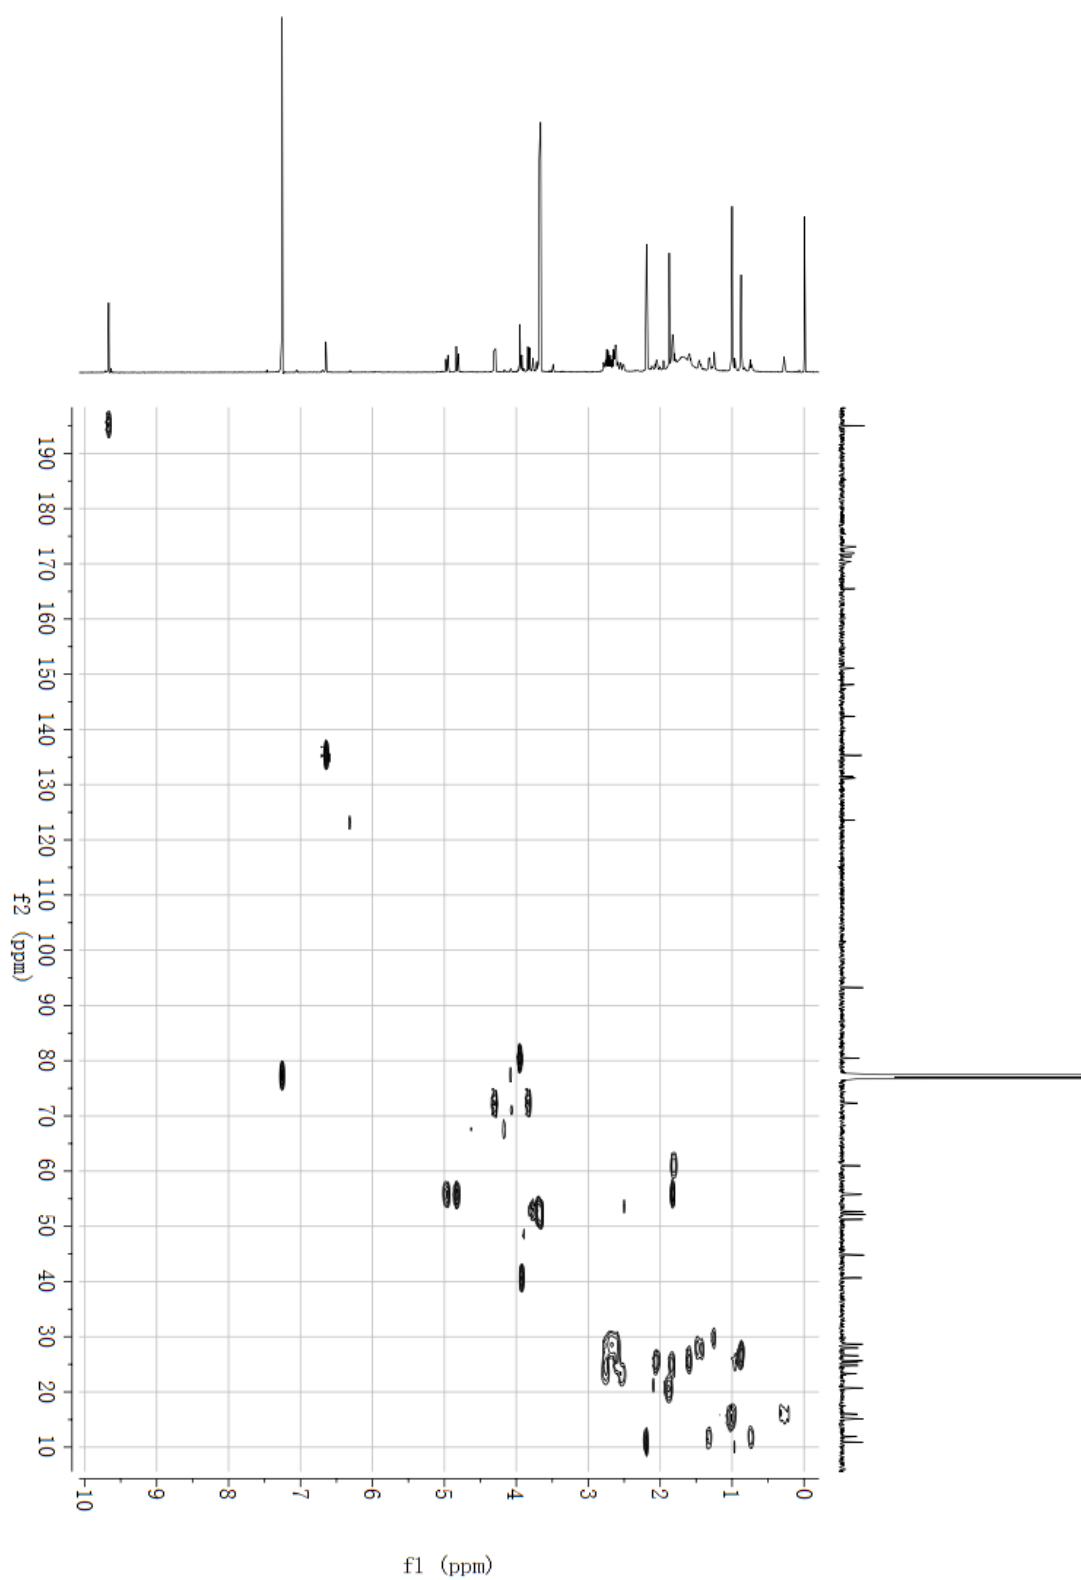



Figure S4. HMBC spectrum of fortunilide A (1) in CDCl<sub>3</sub>

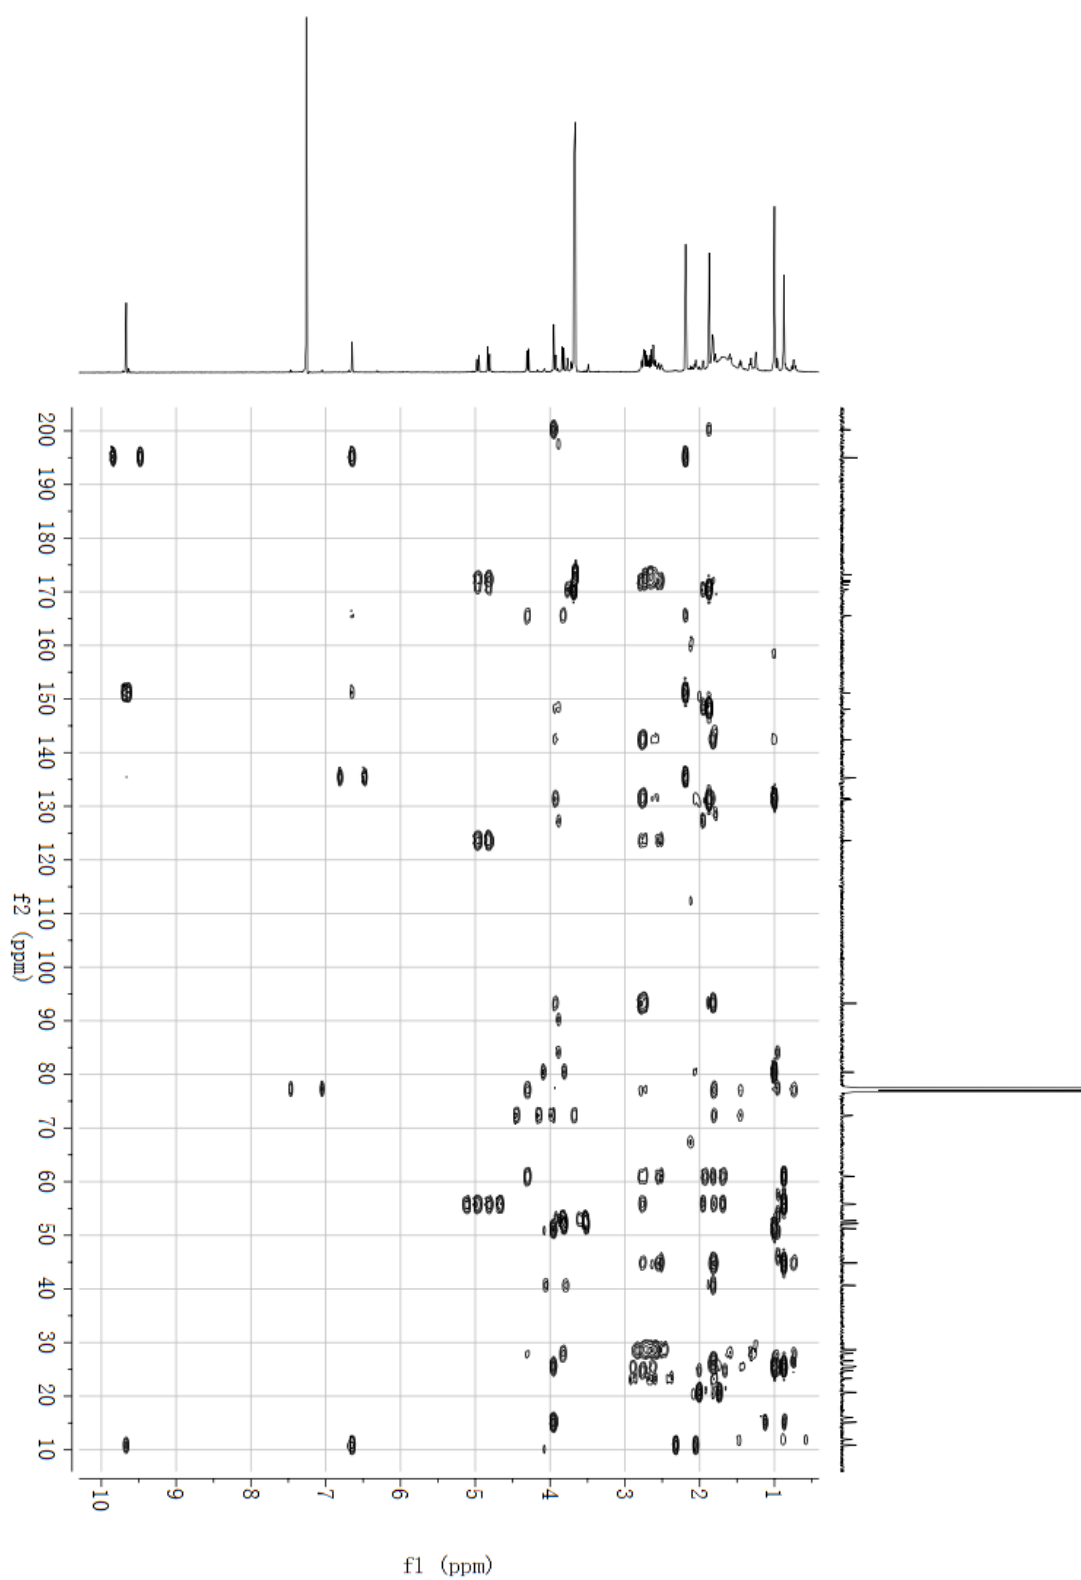

Figure S5. ROESY spectrum of fortunilide A (1) in CDCl<sub>3</sub>

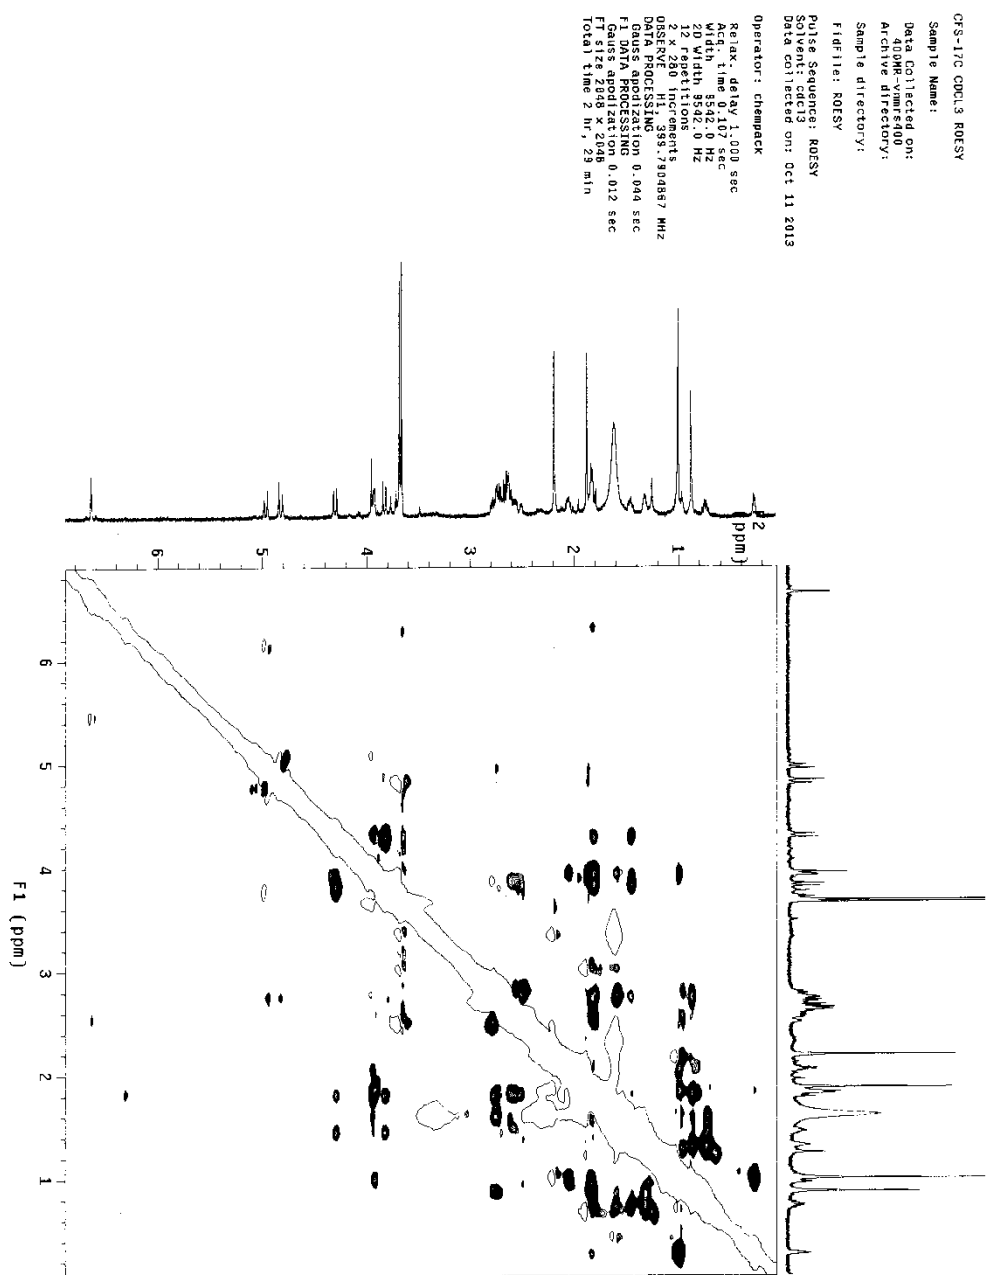

Figure S6. (+)-ESIMS of fortunilide A (1)

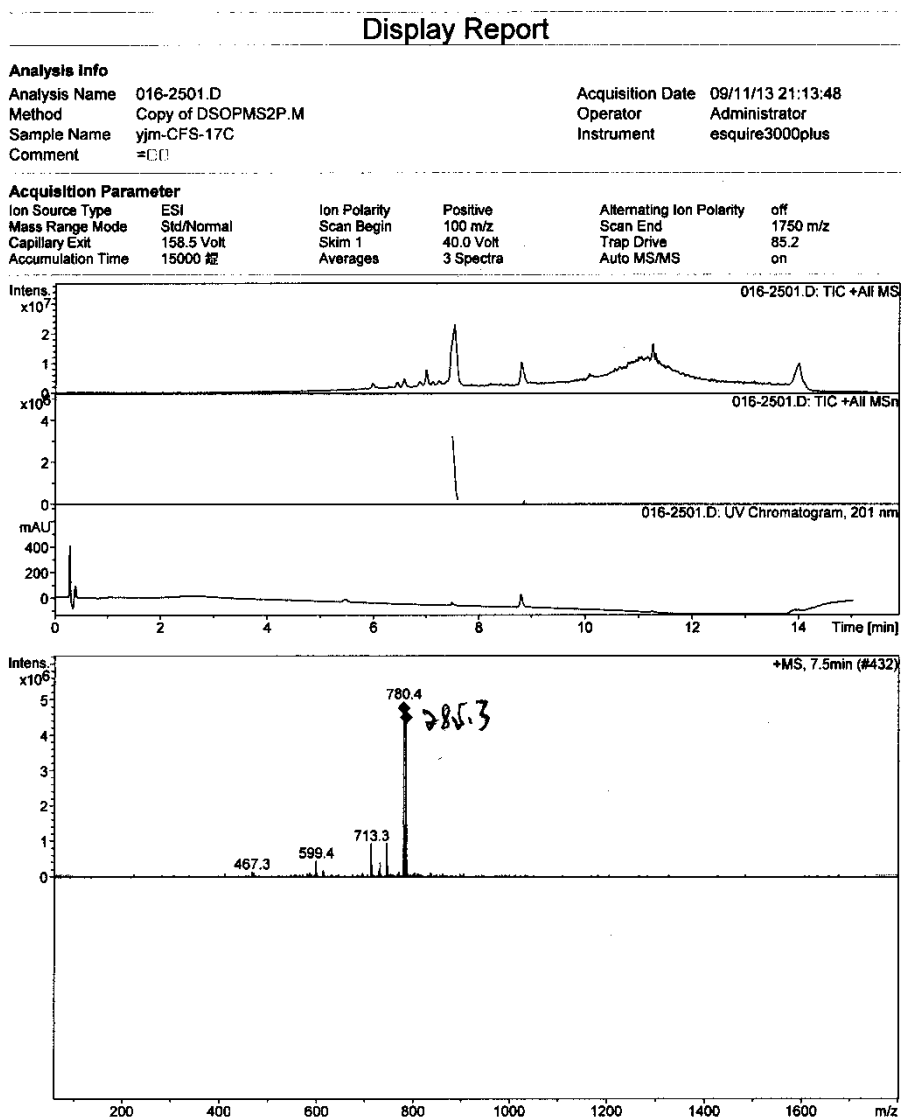

Figure S7. (-)-ESIMS of fortunilide A (1)

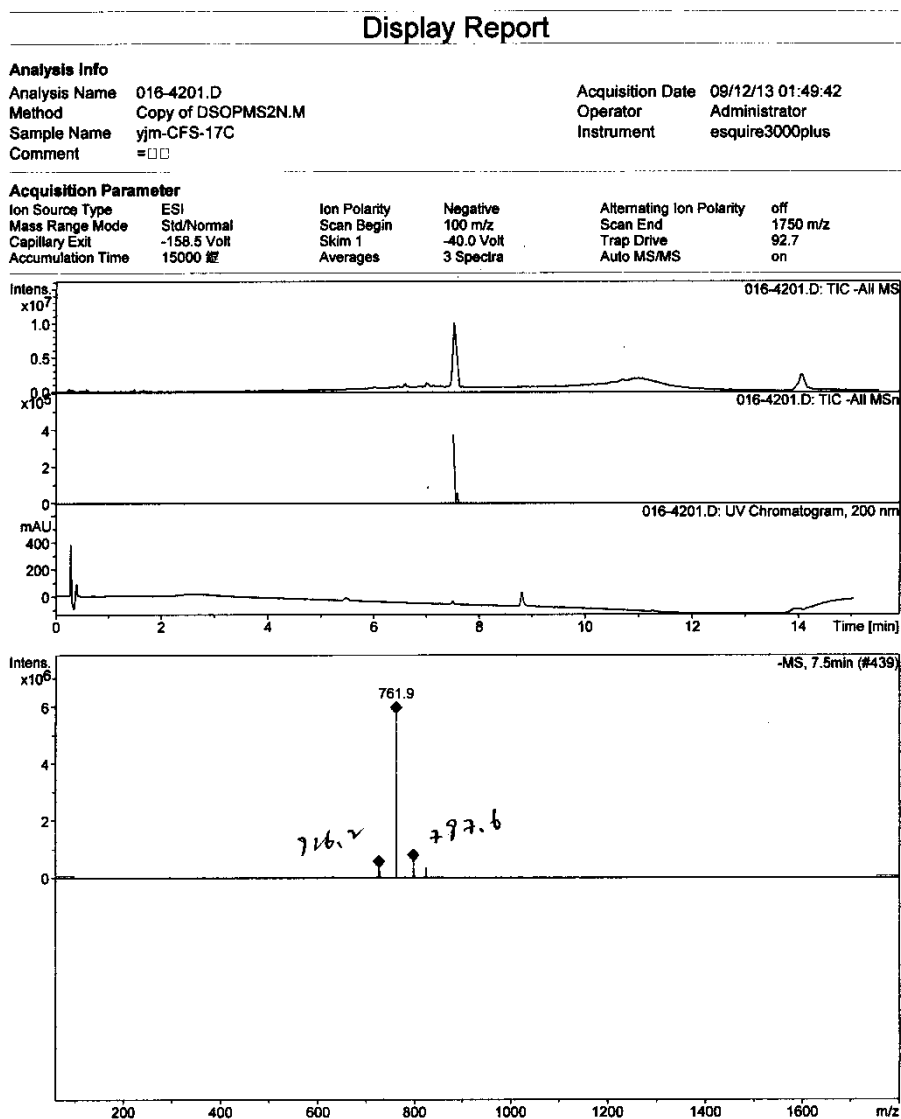

**Figure S8. (+)-HRESIMS of fortunilide (1)**

**Elemental Composition Report**

Page 1

**Single Mass Analysis**

Tolerance = 5.0 PPM / DBE: min = -1.5, max = 50.0

Element prediction: Off

Number of isotope peaks used for i-FIT = 3

Monoisotopic Mass, Even Electron Ions

336 formula(e) evaluated with 3 results within limits (up to 50 closest results for each mass)

Elements Used:

C: 5-80 H: 2-120 O: 0-20 Na: 0-1

CFS-17C

LCT PXE KE324

13-Sep-2013

13:54:24

CFS-17C\_0913 43 (0.935) AM2 (Ar,10000.0,0.00,1.00); ABS; Cm (27.45)

1: TOF MS ES+  
2.20e+004

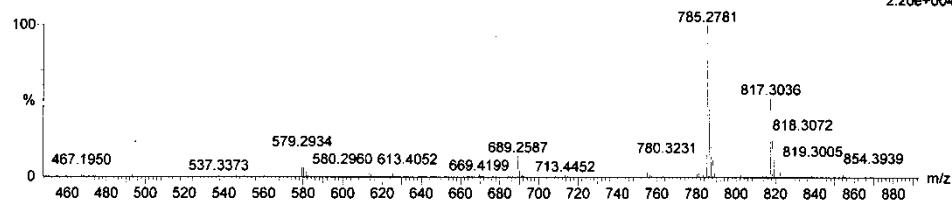

Minimum:

Maximum: 3.0 5.0 -1.5

Maximum: 3.0 5.0 50.0

| Mass     | Calc. Mass | mDa  | PPM  | DBE  | i-FIT | i-FIT (Norm) | Formula        |
|----------|------------|------|------|------|-------|--------------|----------------|
| 785.2781 | 785.2785   | -0.4 | -0.5 | 18.5 | 78.4  | 1.0          | C41 H46 O14 Na |
|          | 785.2809   | -2.8 | -3.6 | 21.5 | 78.8  | 1.5          | C43 H45 O14    |
|          | 785.2751   | 3.0  | 3.8  | 30.5 | 78.3  | 0.9          | C50 H41 O9     |

Figure S9. IR spectrum of fortunilide A (1)

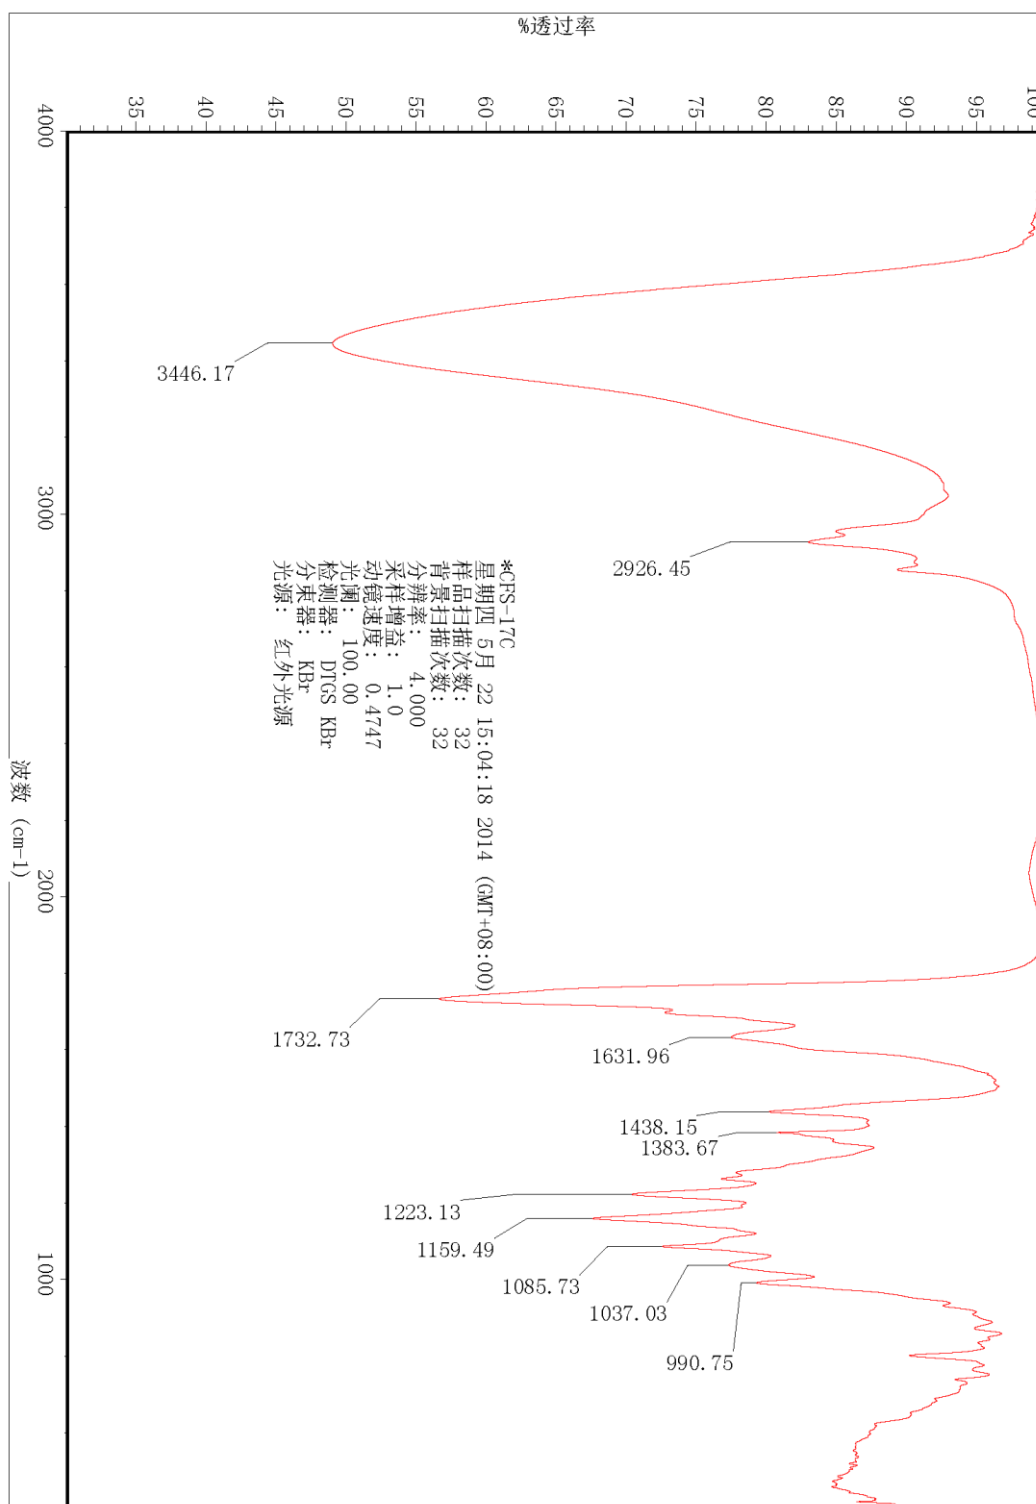

Figure S10. <sup>1</sup>H NMR spectrum of fortunilide B (2) in CDCl<sub>3</sub>

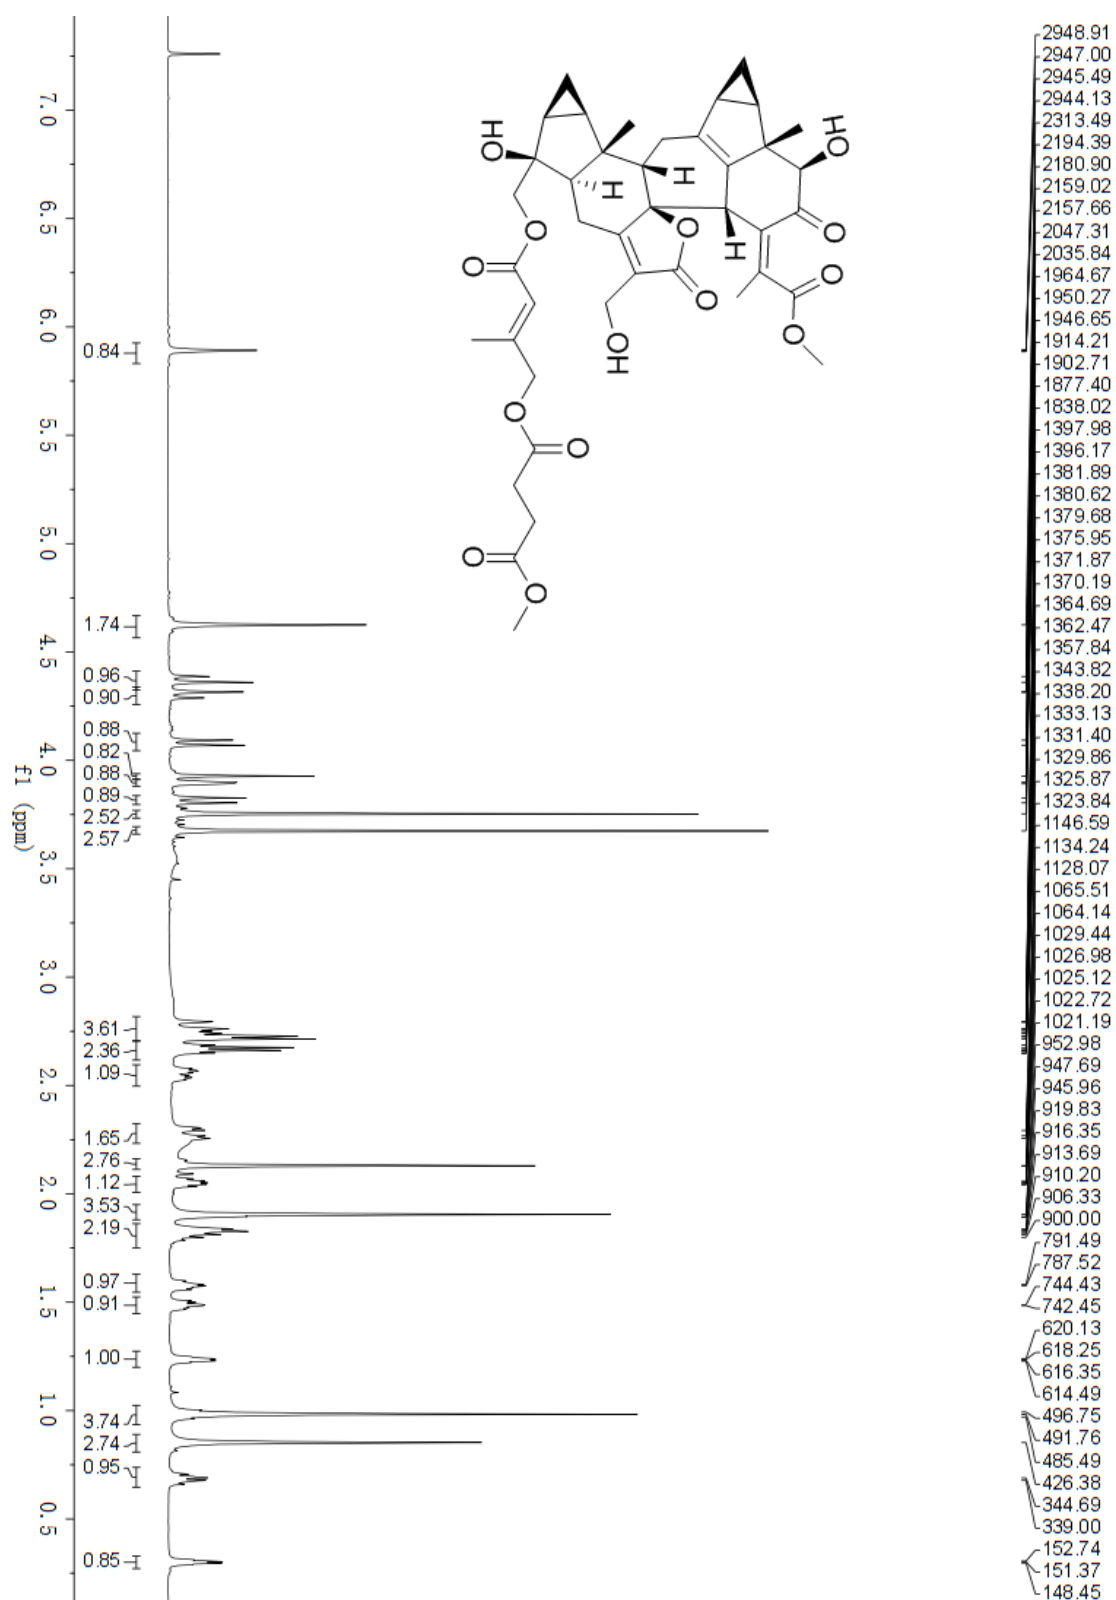

Figure S11.  $^{13}\text{C}$  NMR spectrum of fortunilide B (2) in  $\text{CDCl}_3$

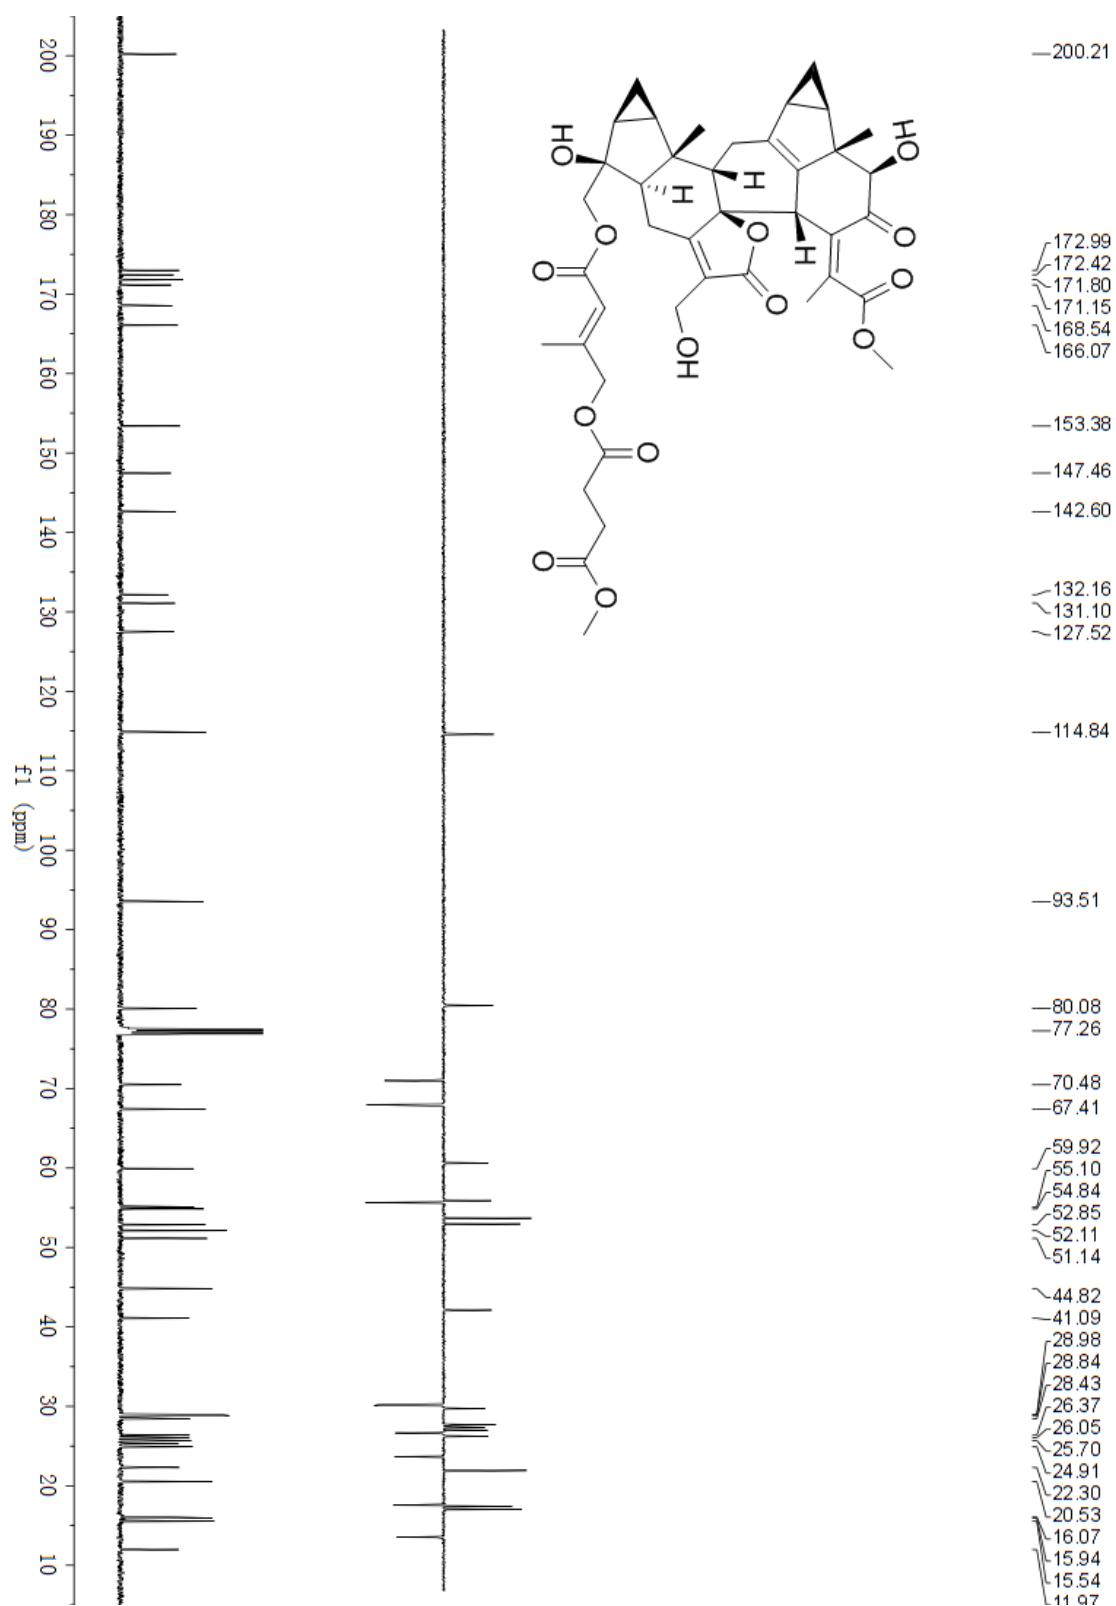



Figure S12. HSQC spectrum of fortunilide B (2) in CDCl<sub>3</sub>

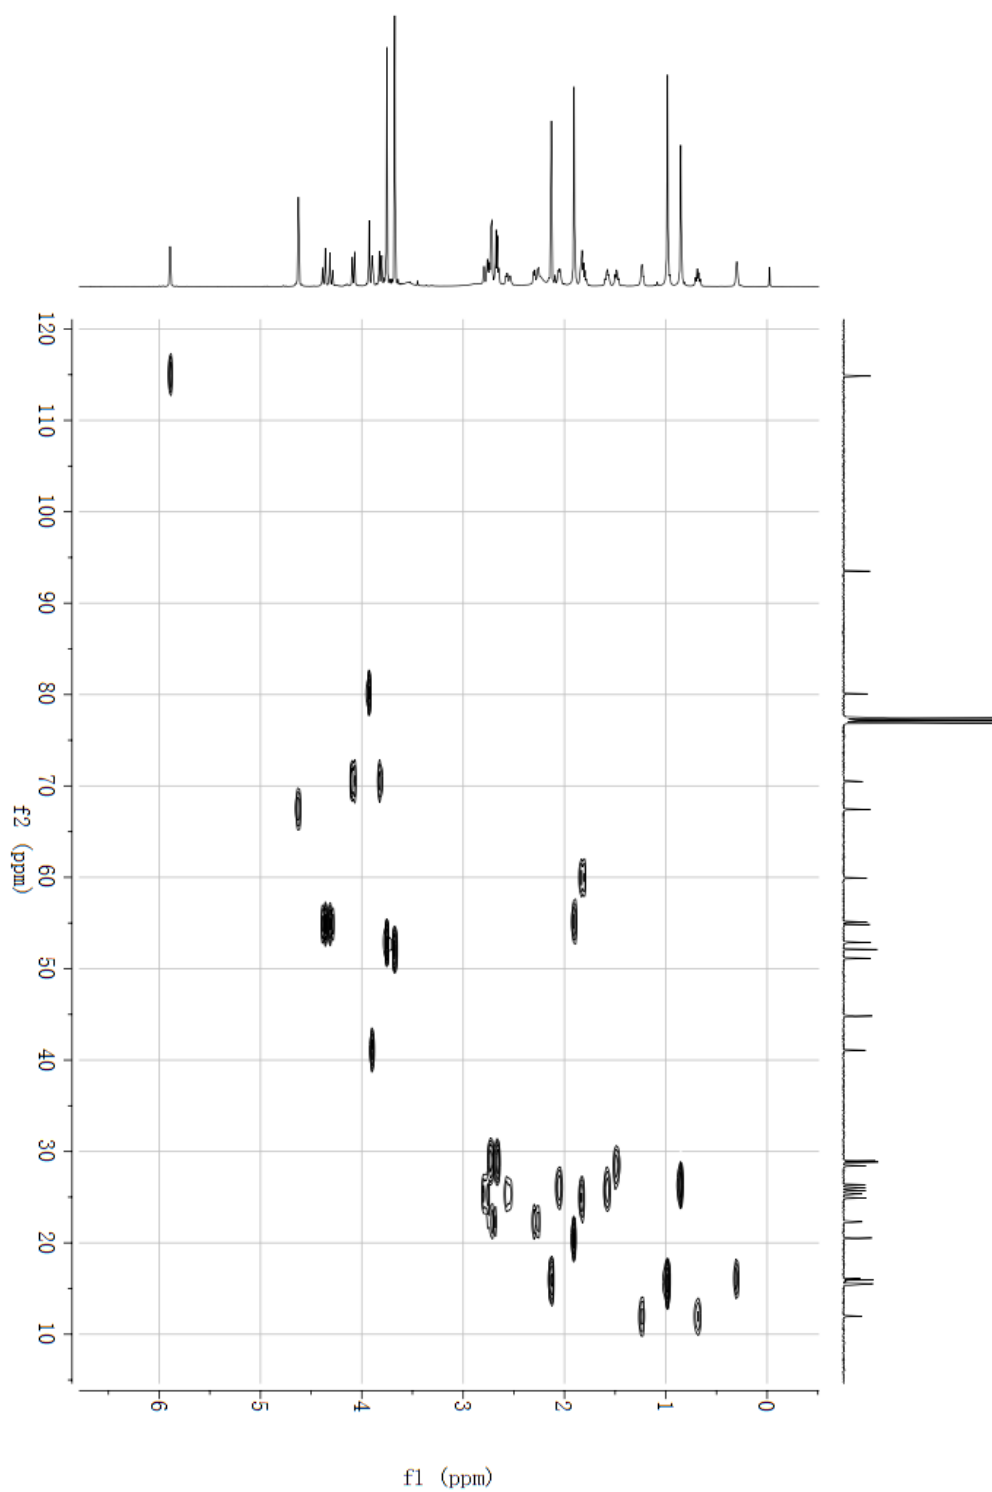

Figure S13. HMBC spectrum of fortunilide B (2) in CDCl<sub>3</sub>

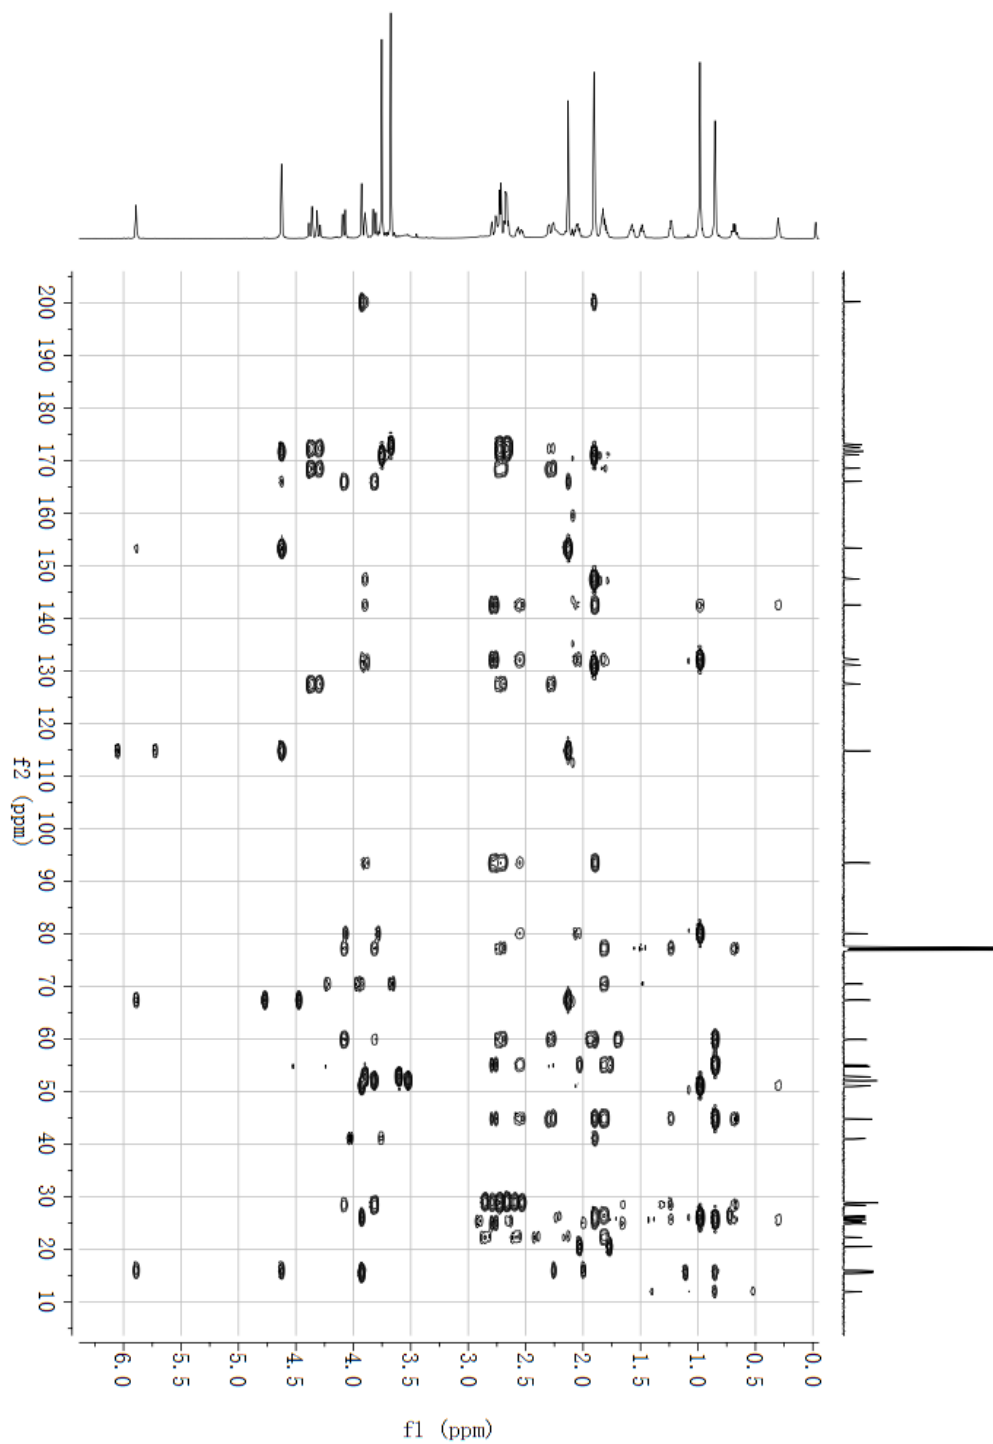

Figure S14. ROESY spectrum of fortunilide B (2) in CDCl<sub>3</sub>

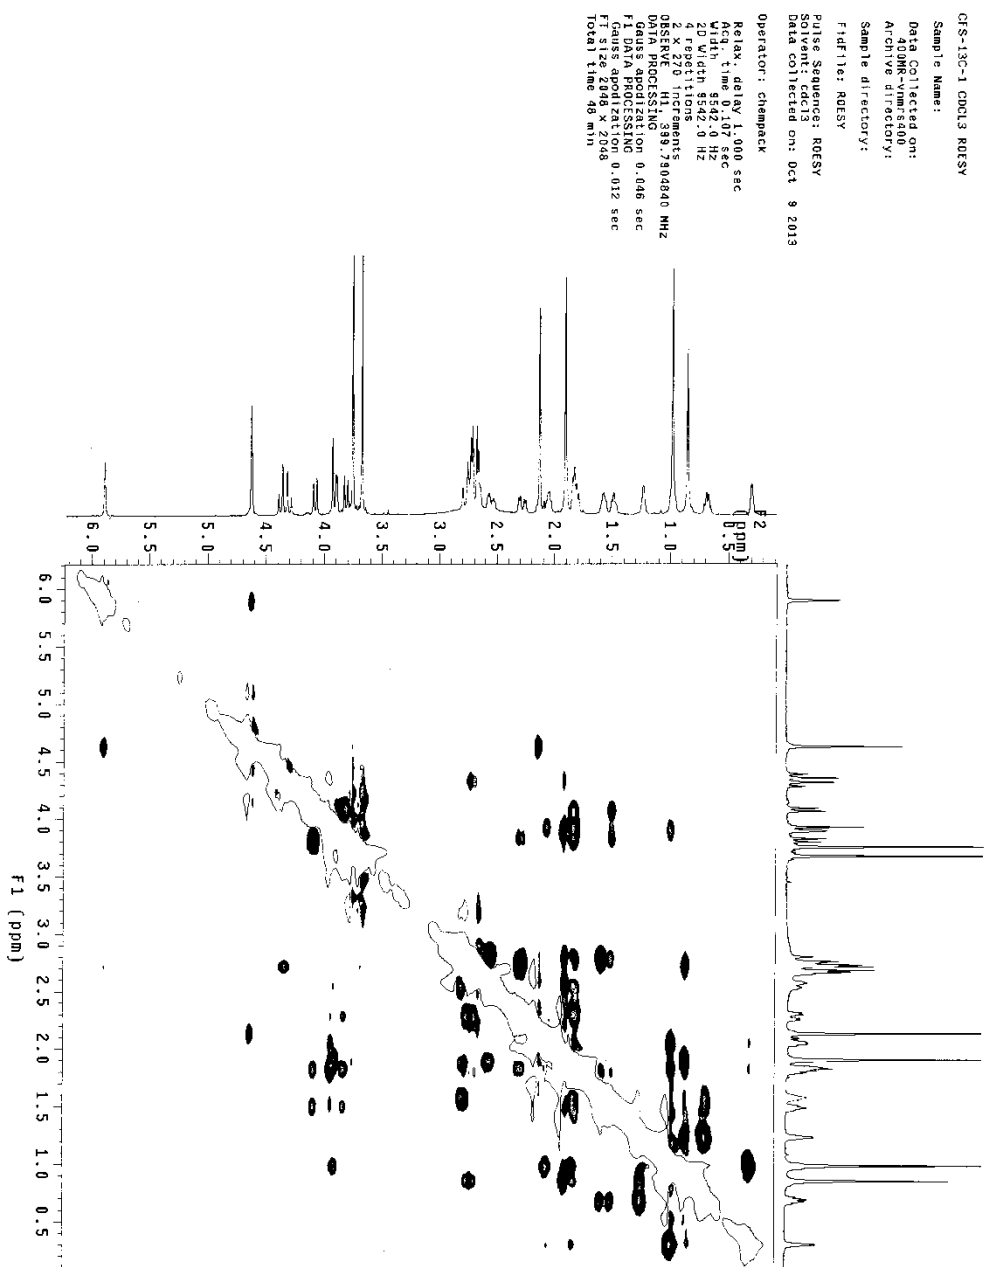

Figure S15. (+)-ESIMS of fortunilide B (2)

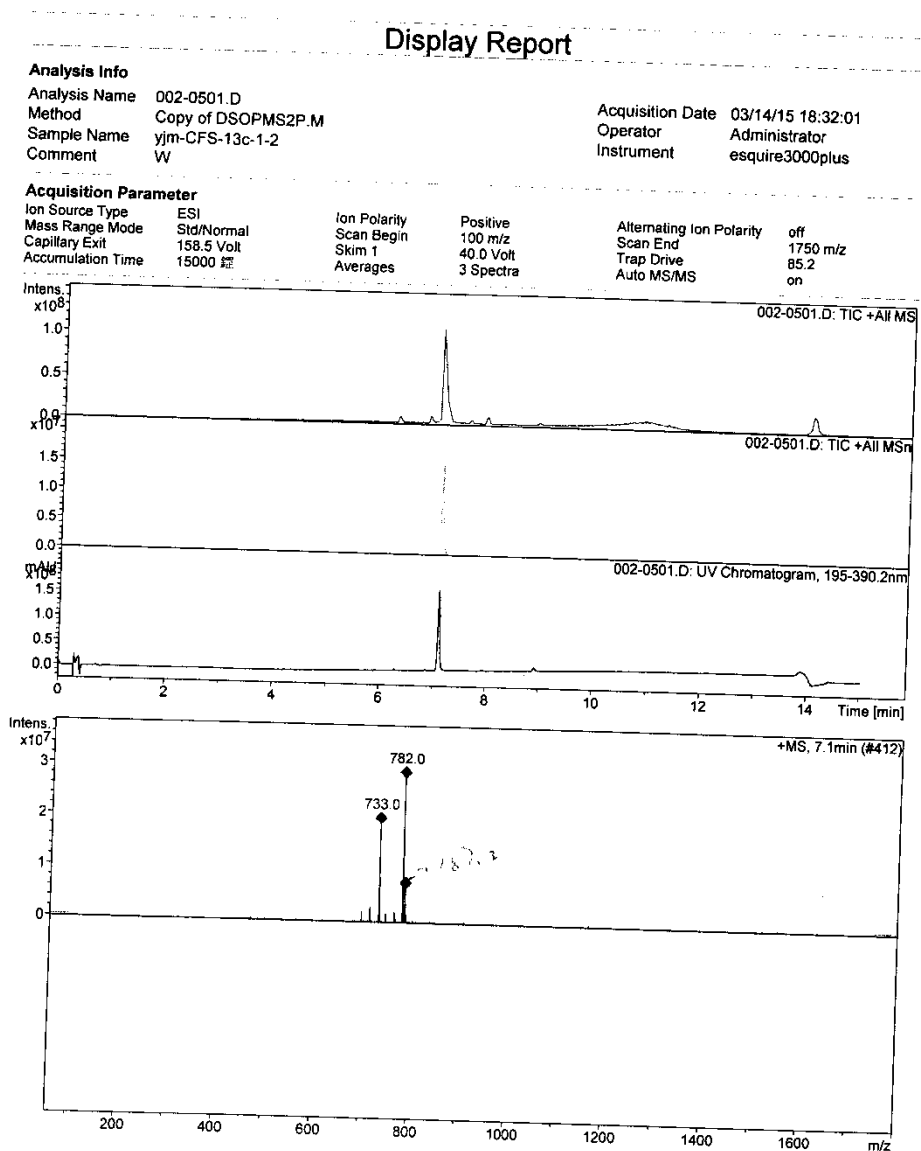

Figure S16. (-)-ESIMS of fortunilide B (2)

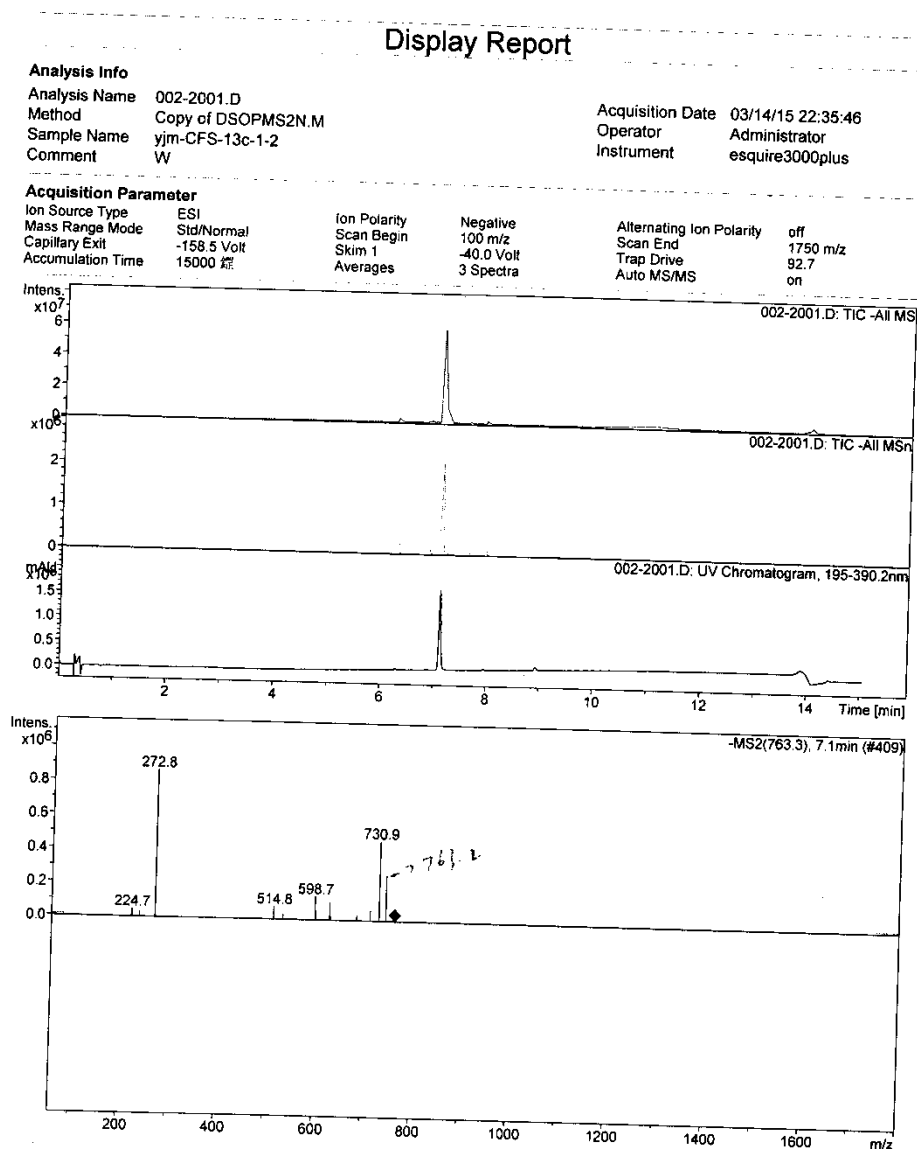

Figure S17. (+)-HRESIMS of fortunilide B (2)

Elemental Composition Report

Page 1

Single Mass Analysis

Tolerance = 3.0 PPM / DBE: min = -1.5, max = 50.0

Element prediction: Off

Number of isotope peaks used for i-FIT = 3

Monoisotopic Mass, Even Electron Ions

337 formula(e) evaluated with 3 results within limits (up to 50 closest results for each mass)

Elements Used:

C: 5-80 H: 2-120 O: 0-20 Na: 0-1

CFS-13C-1

LCT PXE KE324

03-Sep-2013

15:27:14

1: TOF MS ES+

1.15e+004

CFS-13C-1\_0903 38 (0.831) AM2 (Ar,10000.0,0.00,1.00); ABS; Cm (22:38)

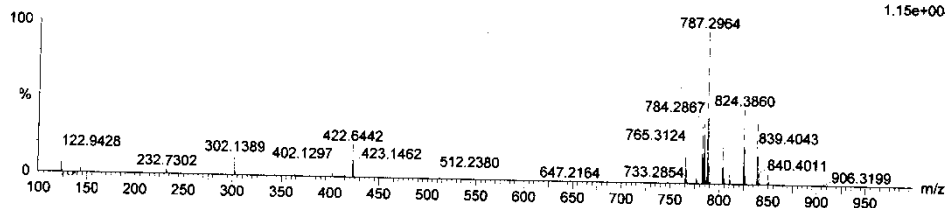

Minimum:

Maximum: 3.0 3.0 -1.5

50.0

| Mass     | Calc. Mass | mDa  | PPM  | DBE  | i-FIT | i-FIT (Norm) | Formula        |
|----------|------------|------|------|------|-------|--------------|----------------|
| 787.2964 | 787.2966   | -0.2 | -0.3 | 20.5 | 50.3  | 1.3          | C43 H47 O14    |
|          | 787.2977   | -1.3 | -1.7 | 39.5 | 56.5  | 7.5          | C59 H40 O Na   |
|          | 787.2942   | 2.2  | 2.8  | 17.5 | 49.4  | 0.3          | C41 H48 O14 Na |

Figure S18. IR spectrum of fortunilide B (2)

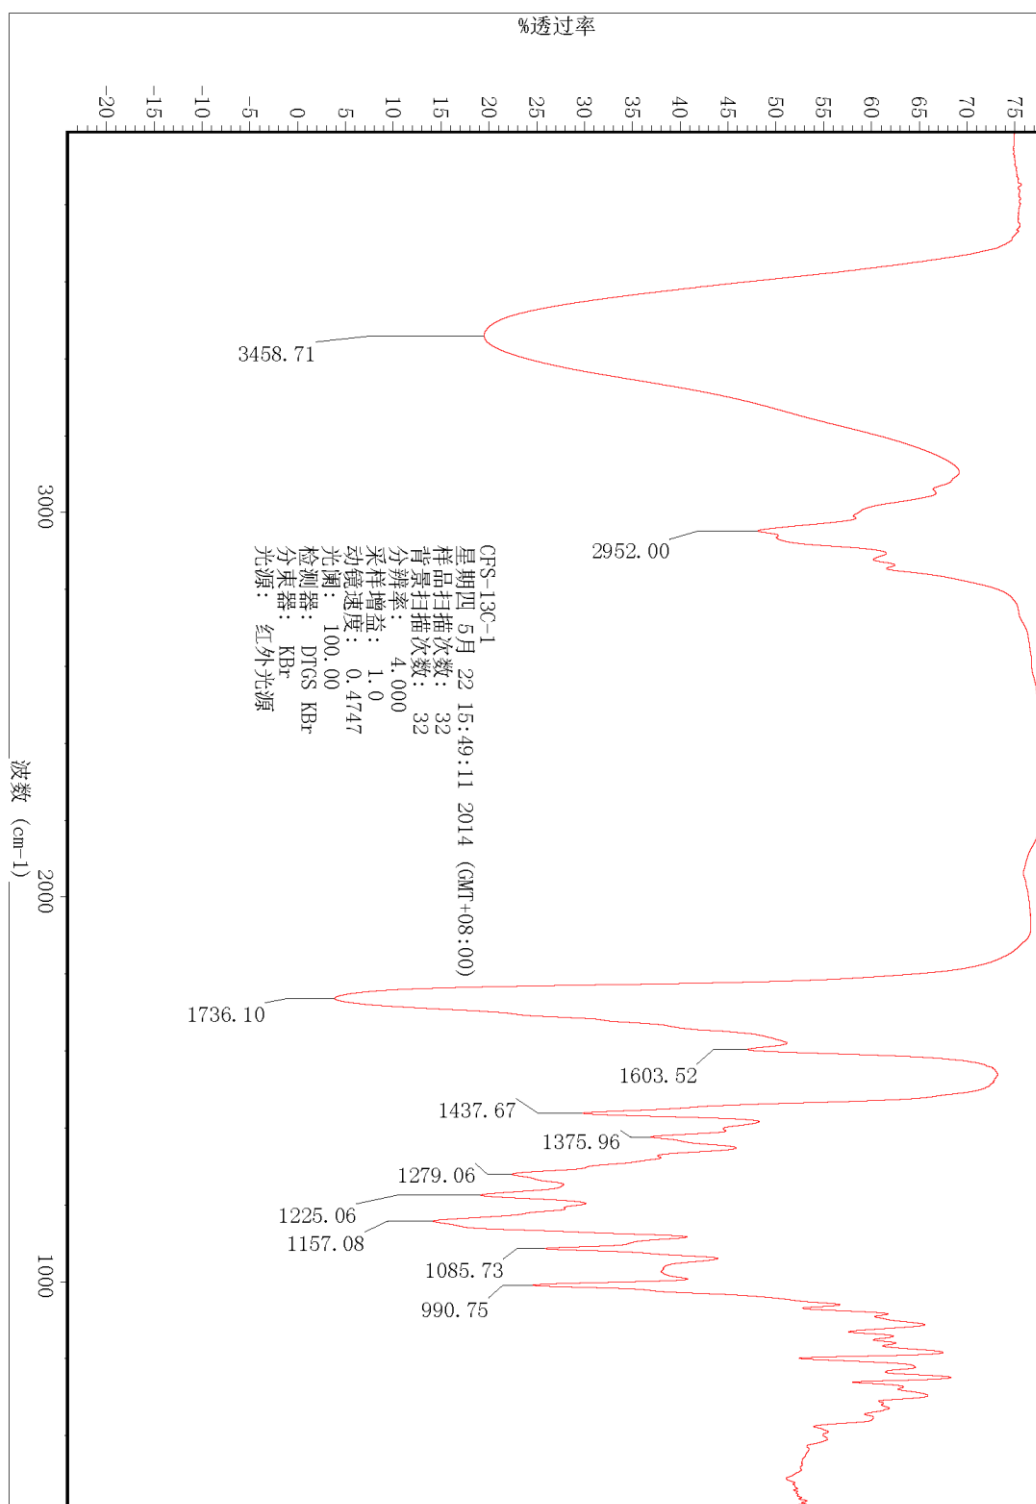

Figure S19. <sup>1</sup>H NMR spectrum of fortunilide C (3) in CDCl<sub>3</sub>

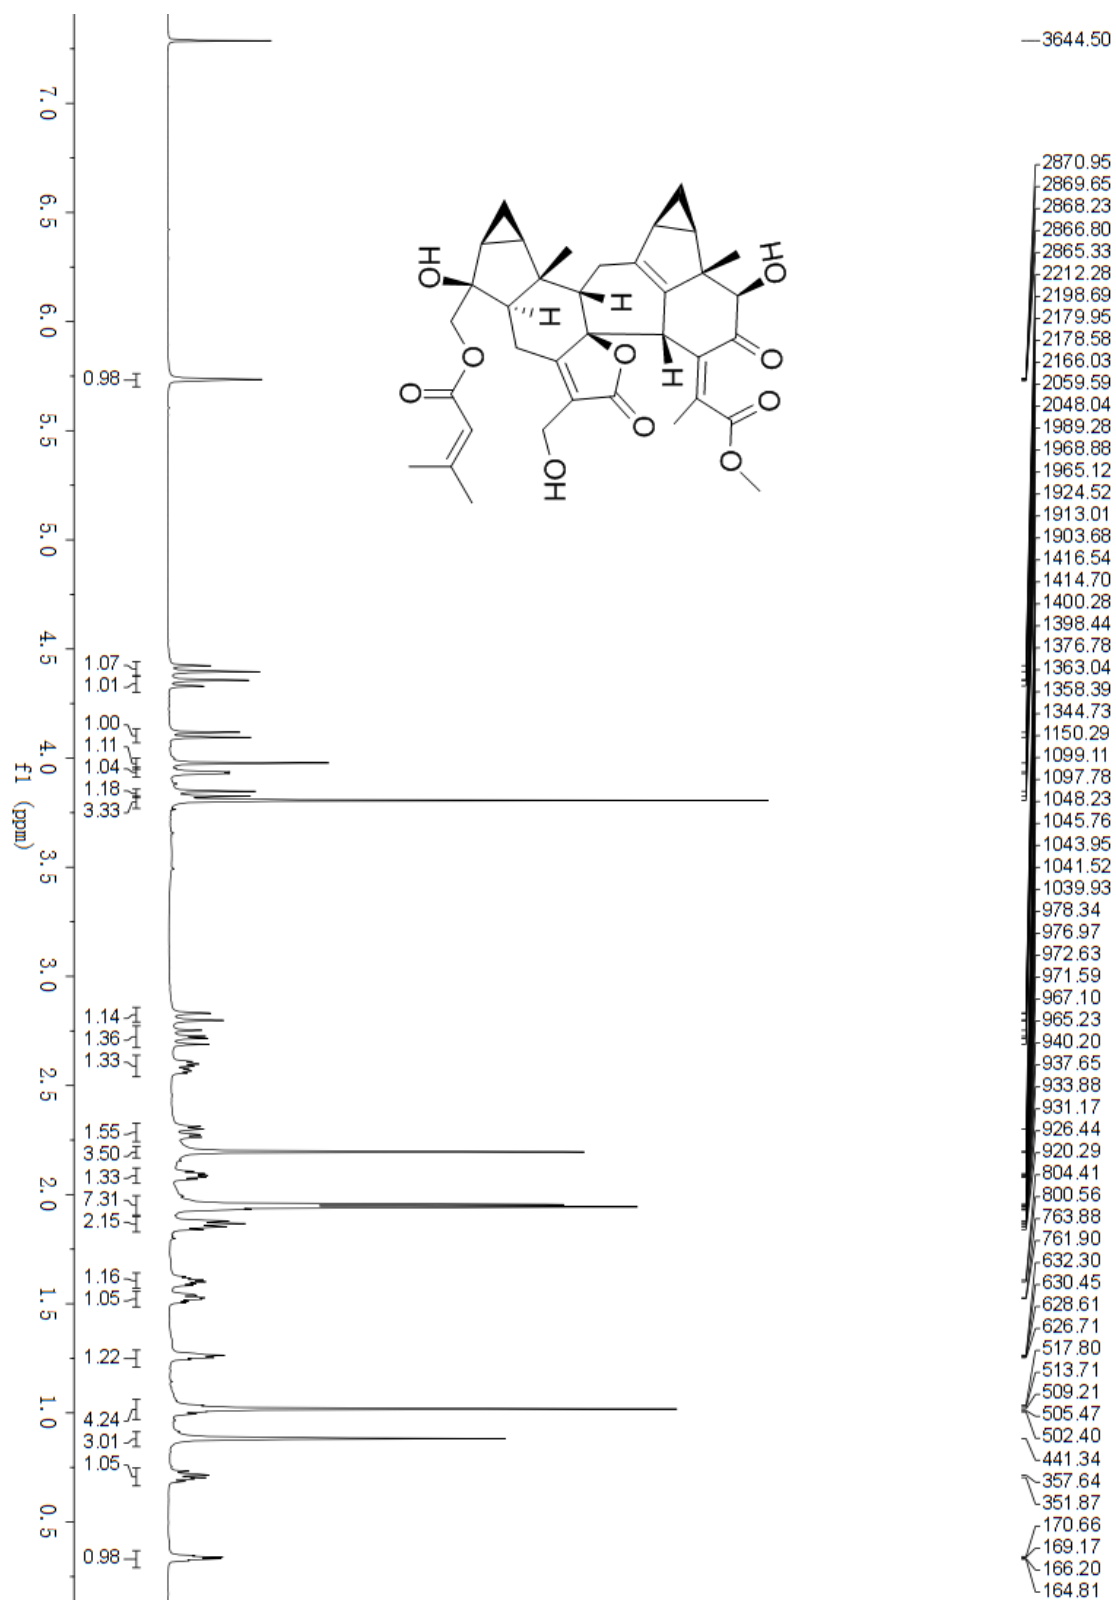



Figure S20.  $^{13}\text{C}$  NMR spectrum of fortunilide C (3) in  $\text{CDCl}_3$

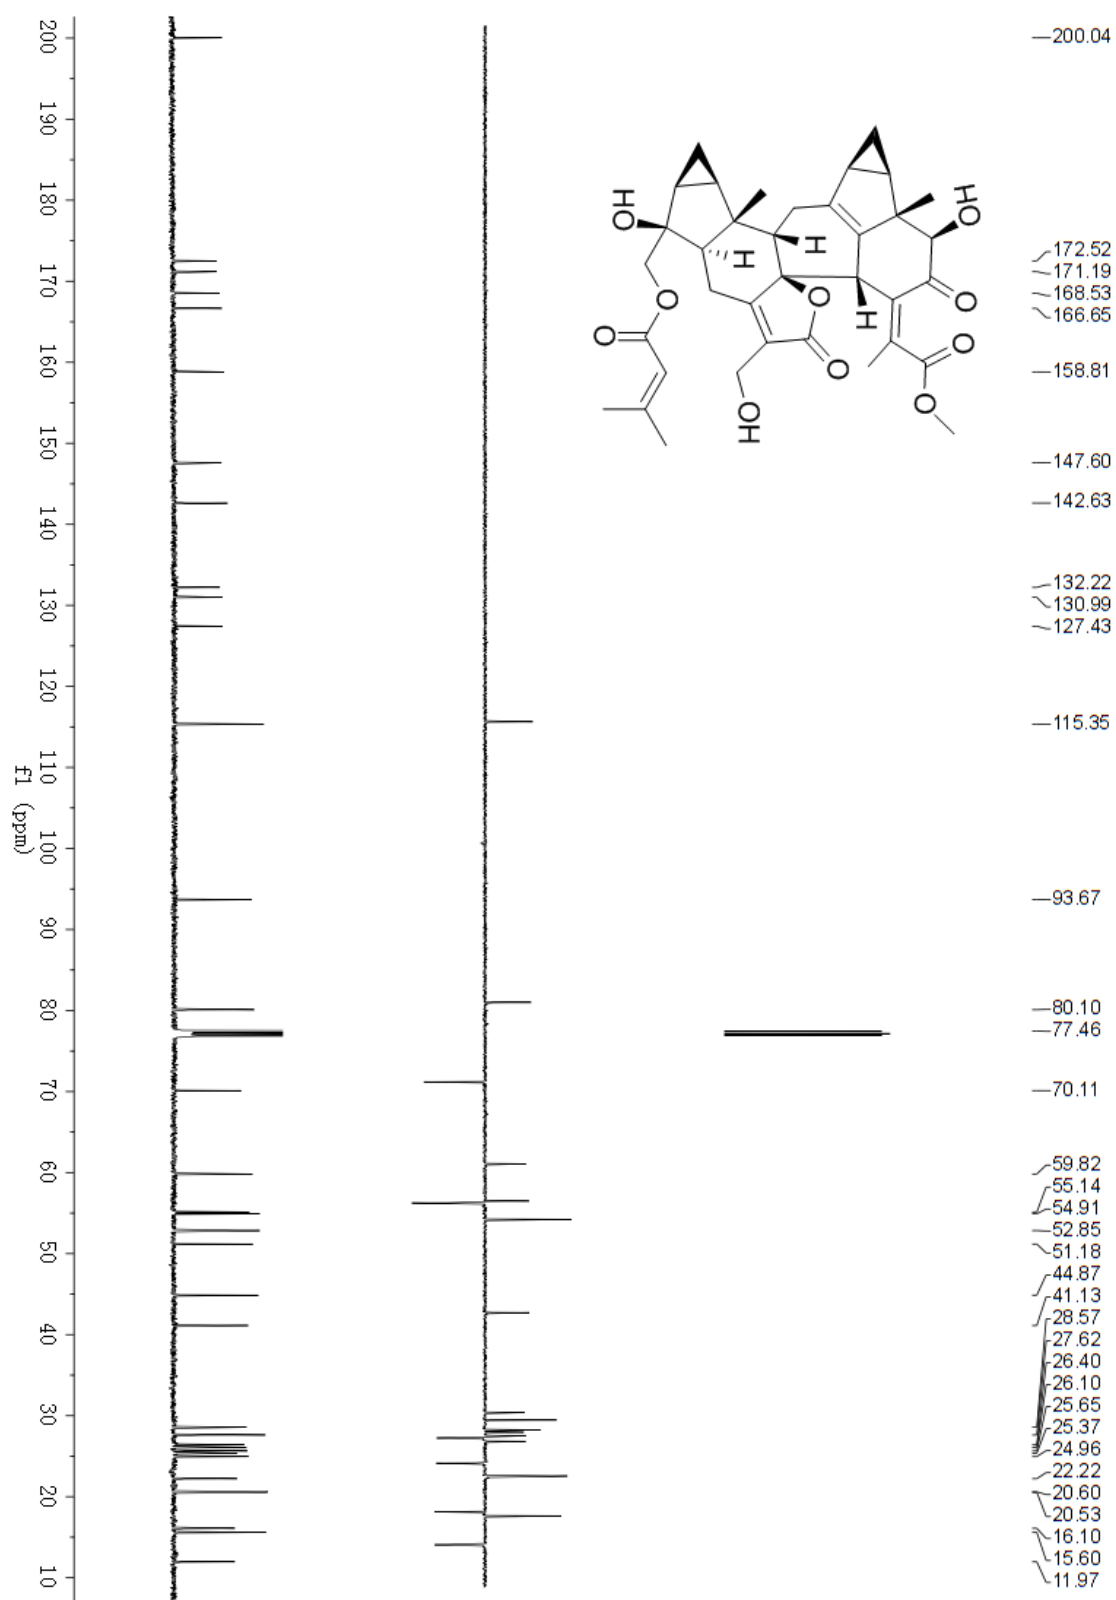

Figure S21. HSQC spectrum of fortunilide C (3) in CDCl<sub>3</sub>

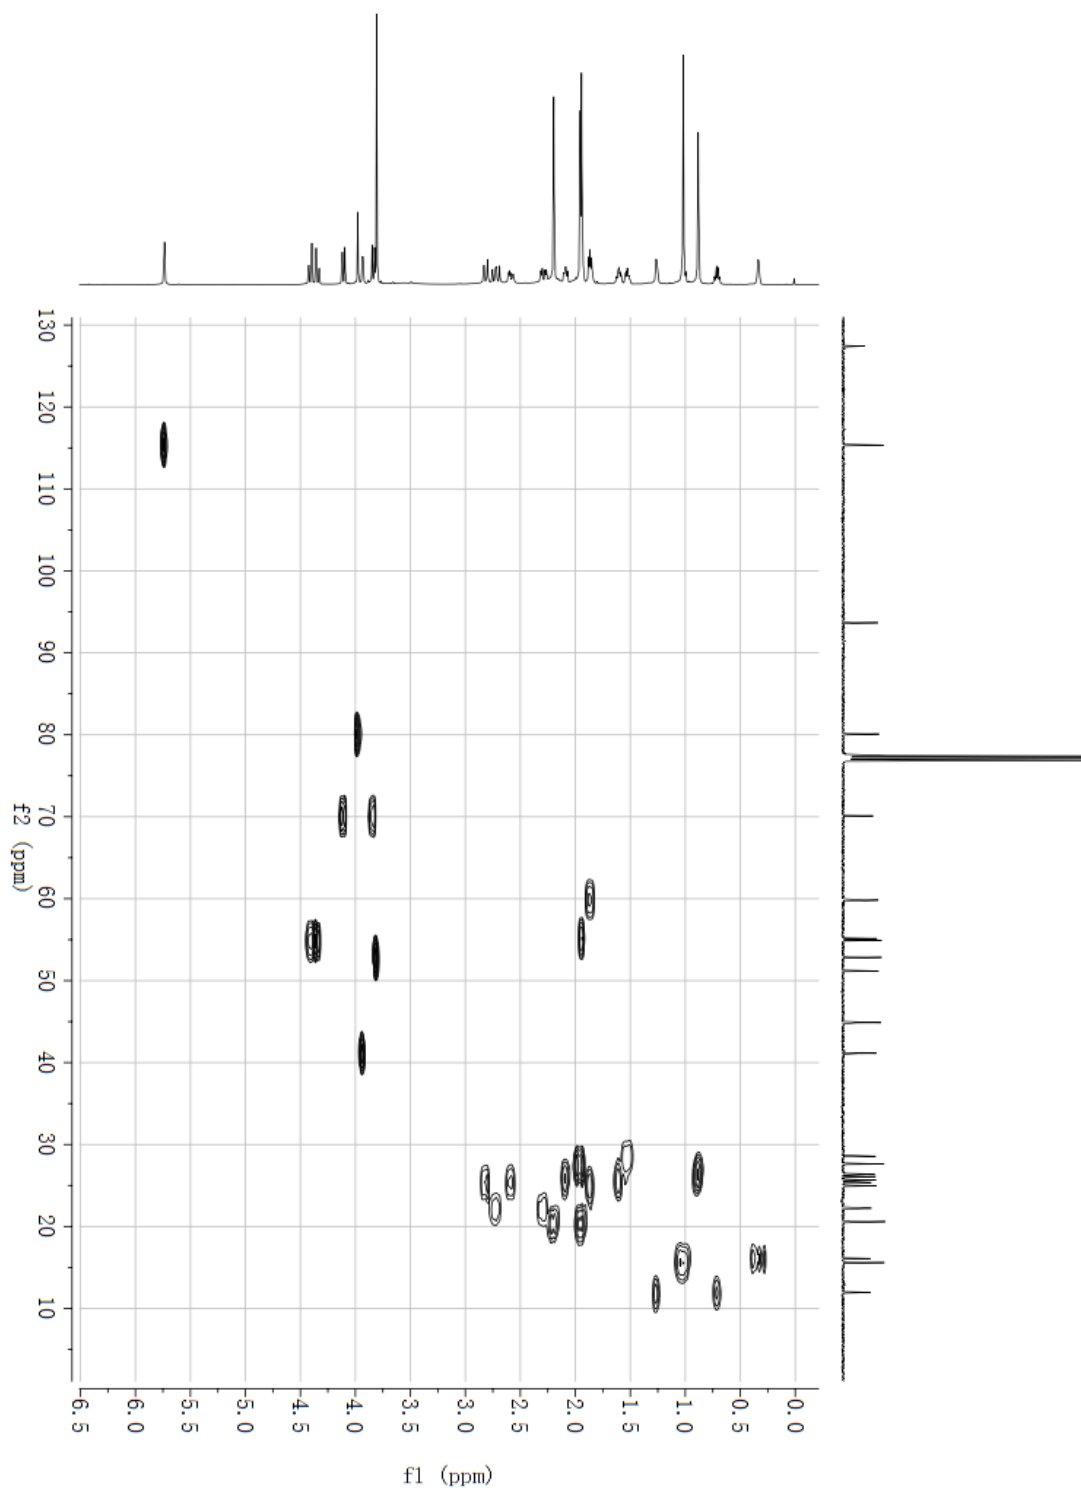

Figure S22. HMBC spectrum of fortunilide C (3) in CDCl<sub>3</sub>

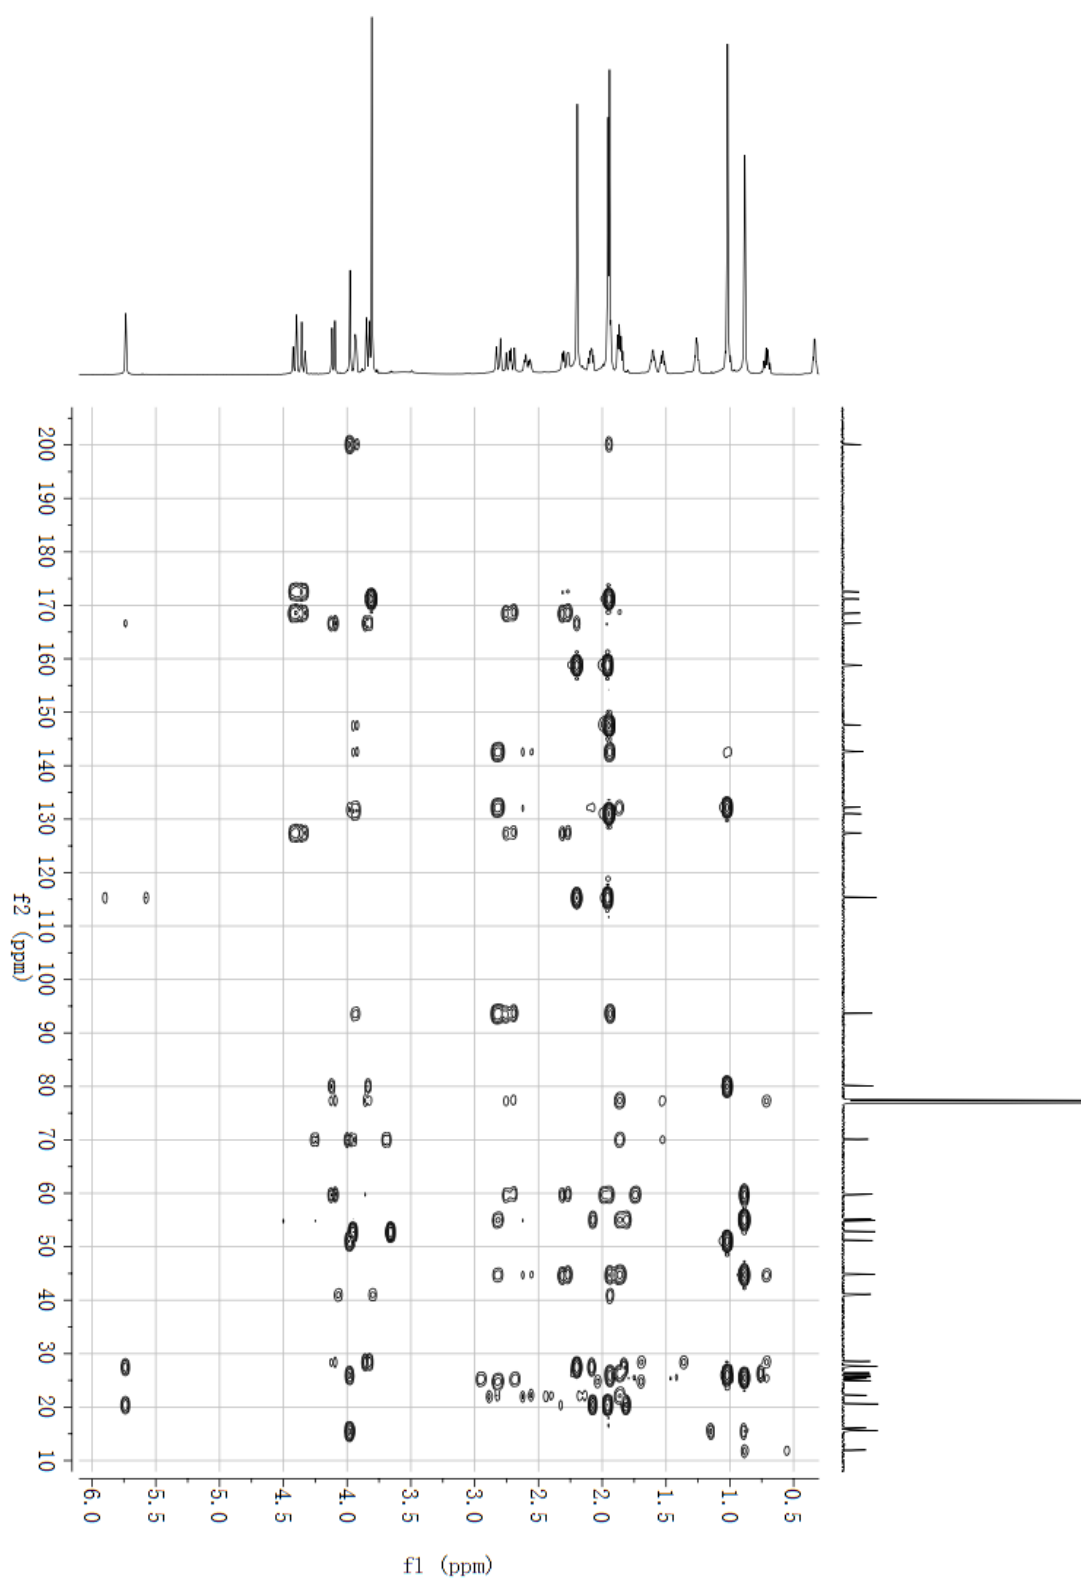

Figure S23. ROESY spectrum of fortunilide C (3)

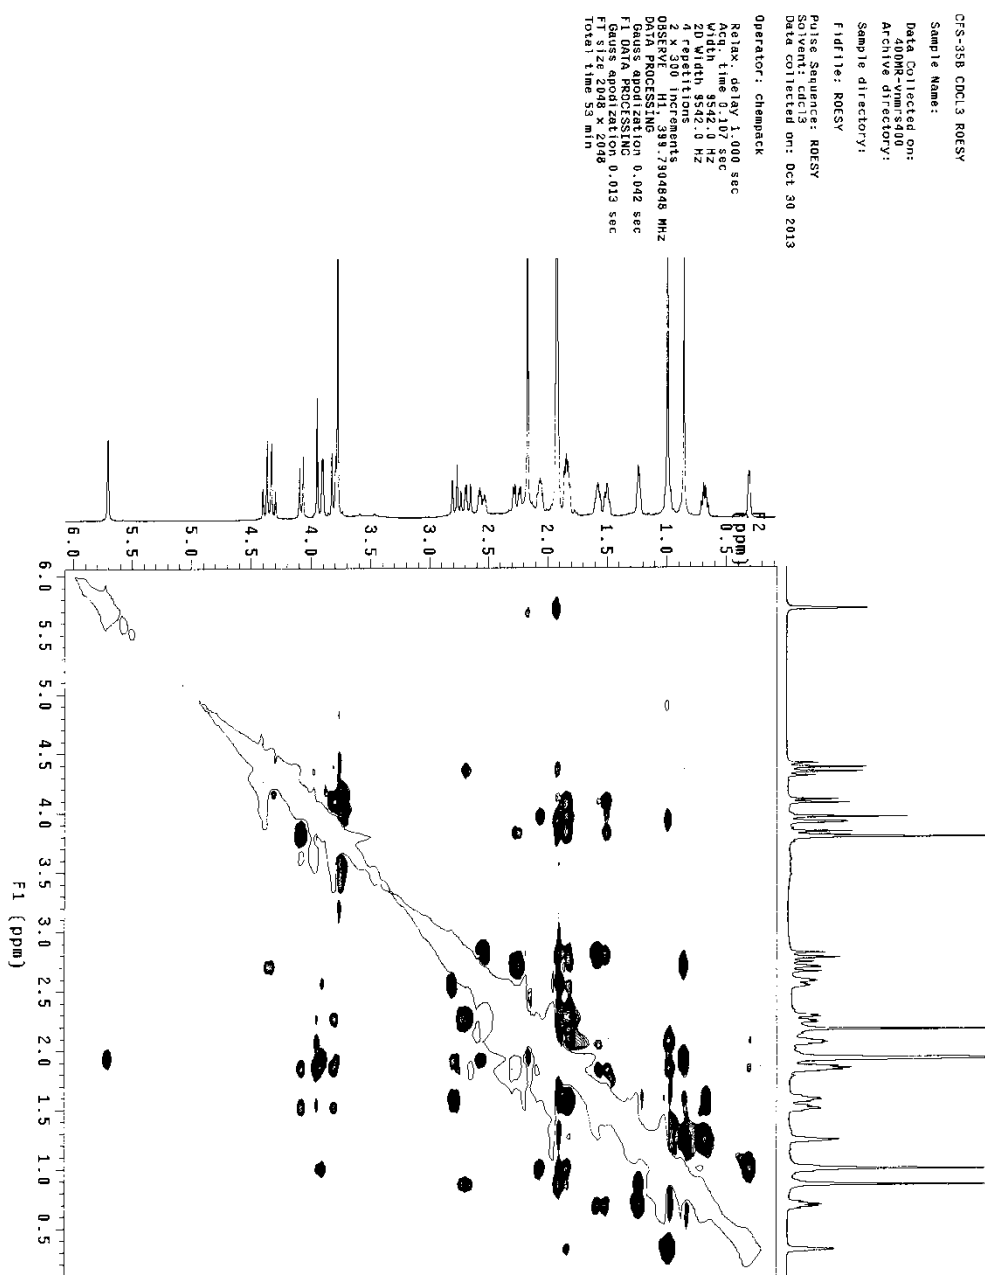

Figure S24. (+)-ESIMS spectrum of fortunilide C (3)

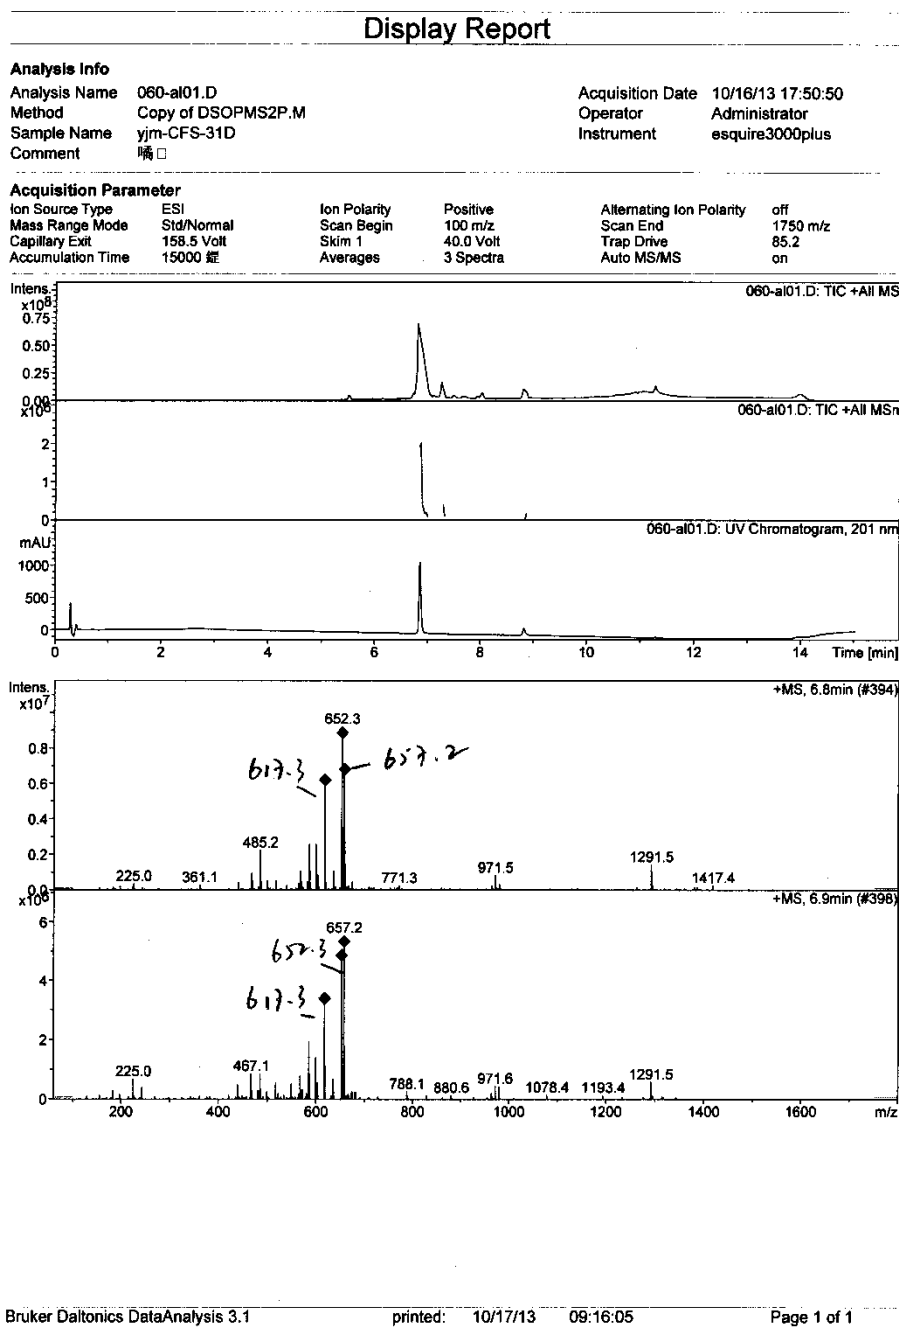

Figure S25. (-)-ESIMS spectrum of fortunilide C (3)

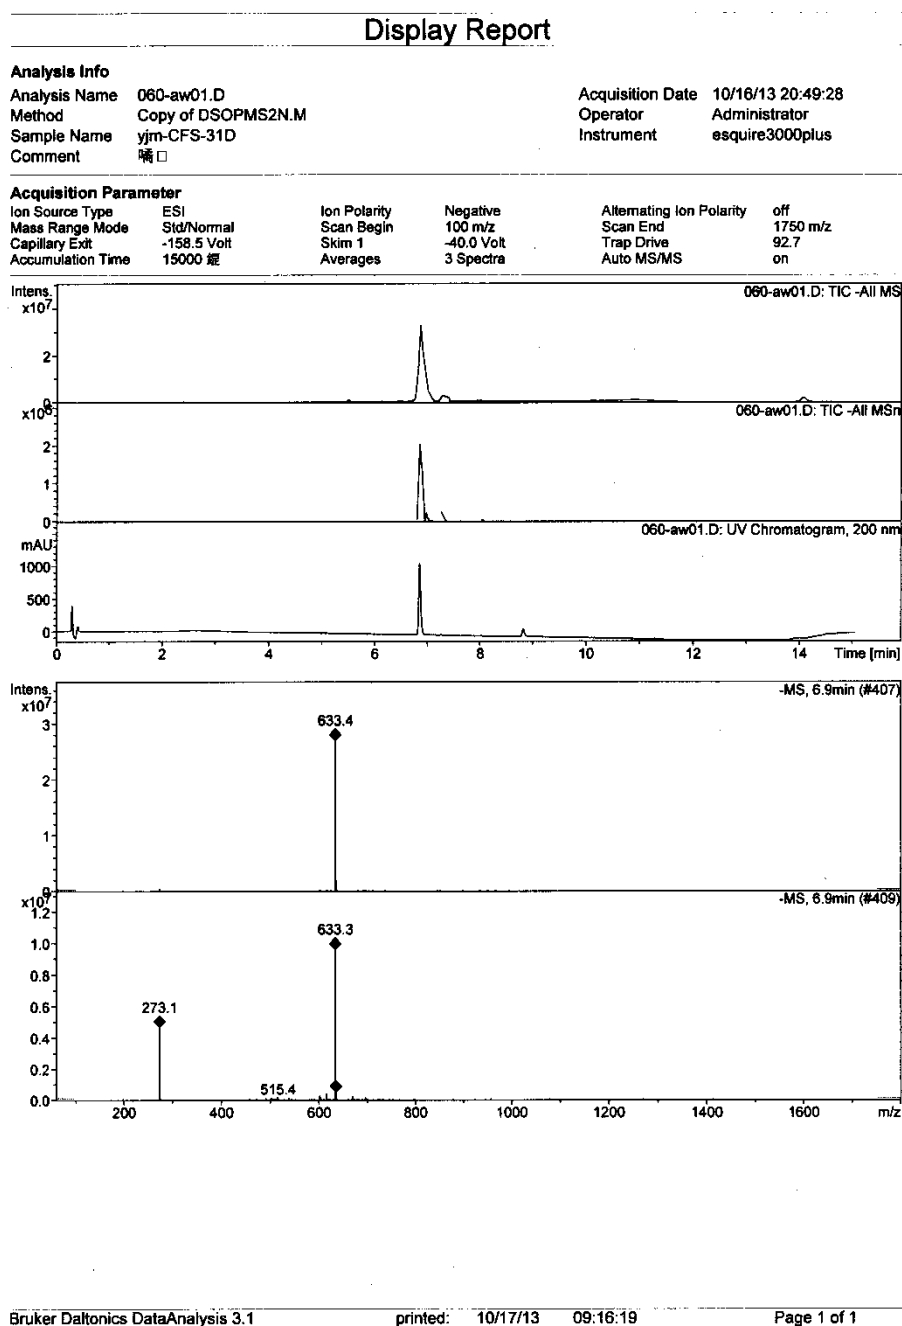

Figure S26. (+)-HRESIMS spectrum of fortunilide C (3)

Elemental Composition Report

Single Mass Analysis

Tolerance = 3.0 PPM / DBE: min = -1.5, max = 50.0

Element prediction: Off

Number of isotope peaks used for i-FIT = 3

Monoisotopic Mass, Even Electron Ions

272 formula(e) evaluated with 1 results within limits (up to 50 closest results for each mass)

Elements Used:

C: 5-80 H: 2-120 O: 0-20 Na: 0-1

CFS-35B

LCT PXE KE324

CFS-35B\_1119 63 (1.378) AM2 (Ar,10500.0,0.00,0.70); ABS; Cm (56.80)

19-Nov-2013  
15:55:04  
1: TOF MS ES+  
6.72e+003

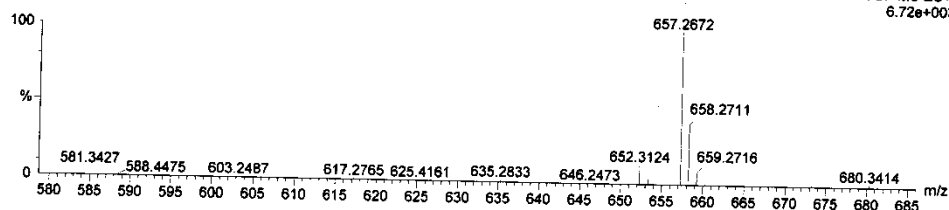

Minimum:

Maximum: 5.0 3.0 -1.5

| Mass     | Calc. Mass | mDa  | PPM  | DBE  | i-FIT | i-FIT (Norm) | Formula        |
|----------|------------|------|------|------|-------|--------------|----------------|
| 657.2672 | 657.2676   | -0.4 | -0.6 | 15.5 | 36.2  | 0.0          | C36 H42 O10 Na |

Figure S27. IR spectrum of fortunilide C (3)

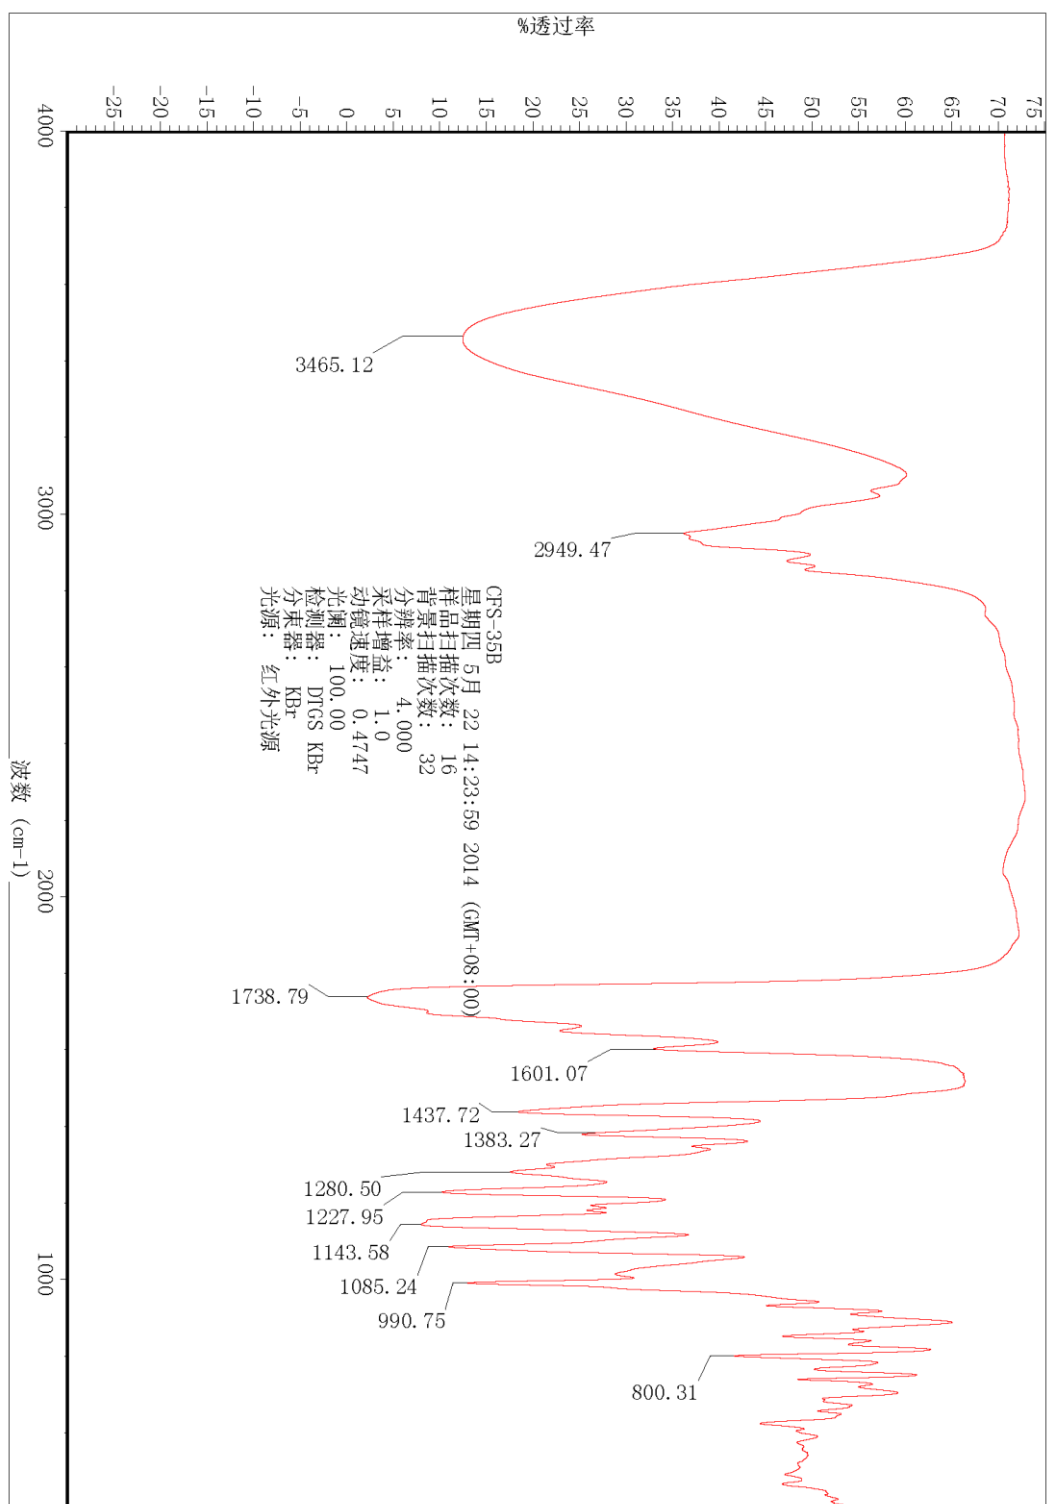



Figure S28. <sup>1</sup>H NMR spectrum of fortunilide D (4) in CDCl<sub>3</sub>

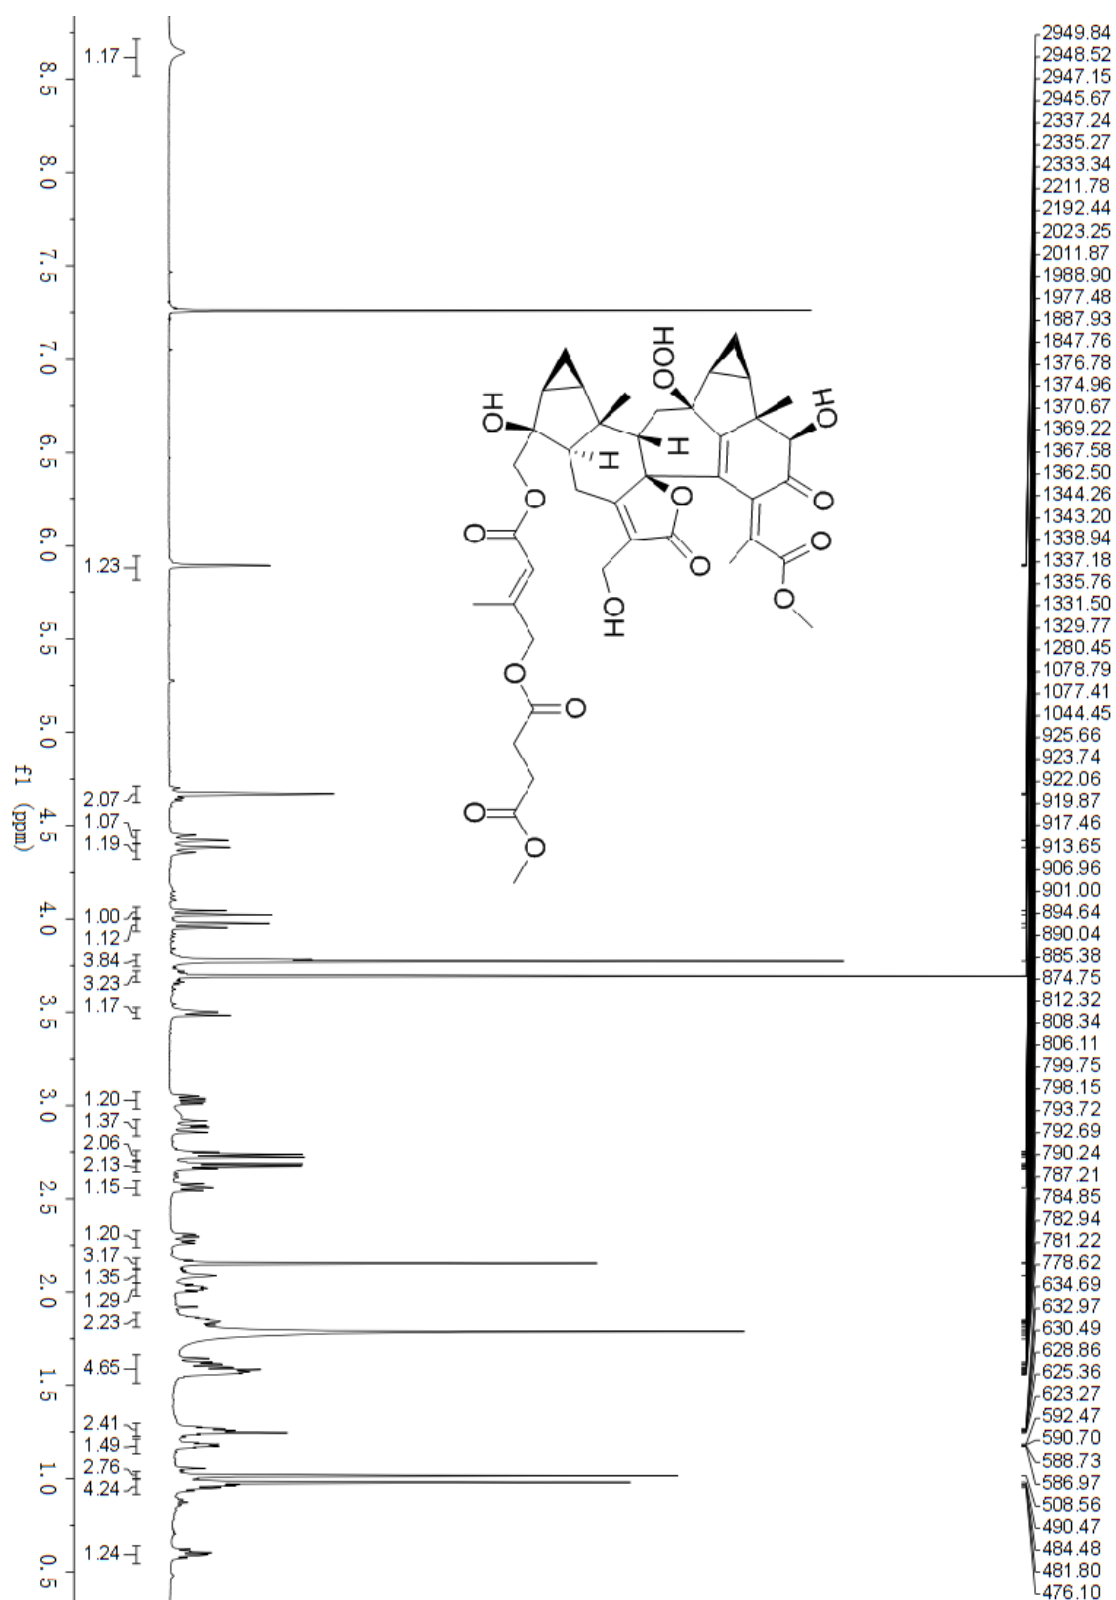

Figure S29.  $^{13}\text{C}$  NMR spectrum of fortunilide D (4) in  $\text{CDCl}_3$

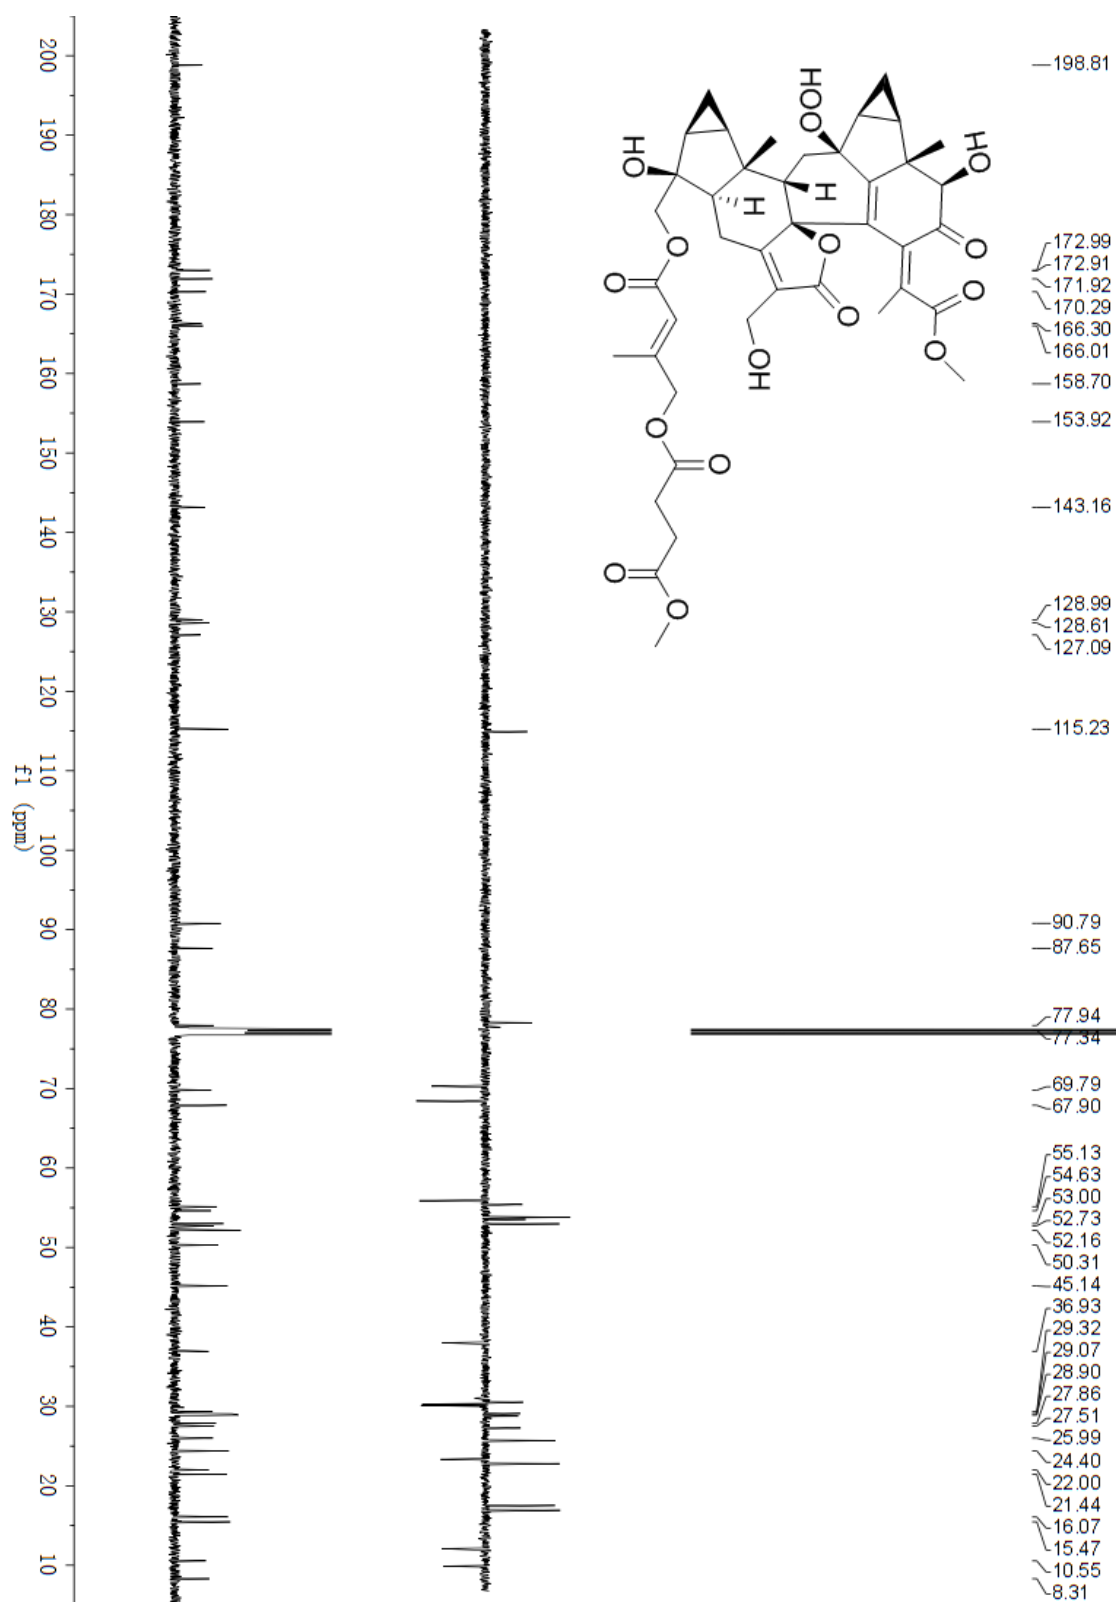

Figure S30. HSQC spectrum of fortunilide D (4) in CDCl<sub>3</sub>

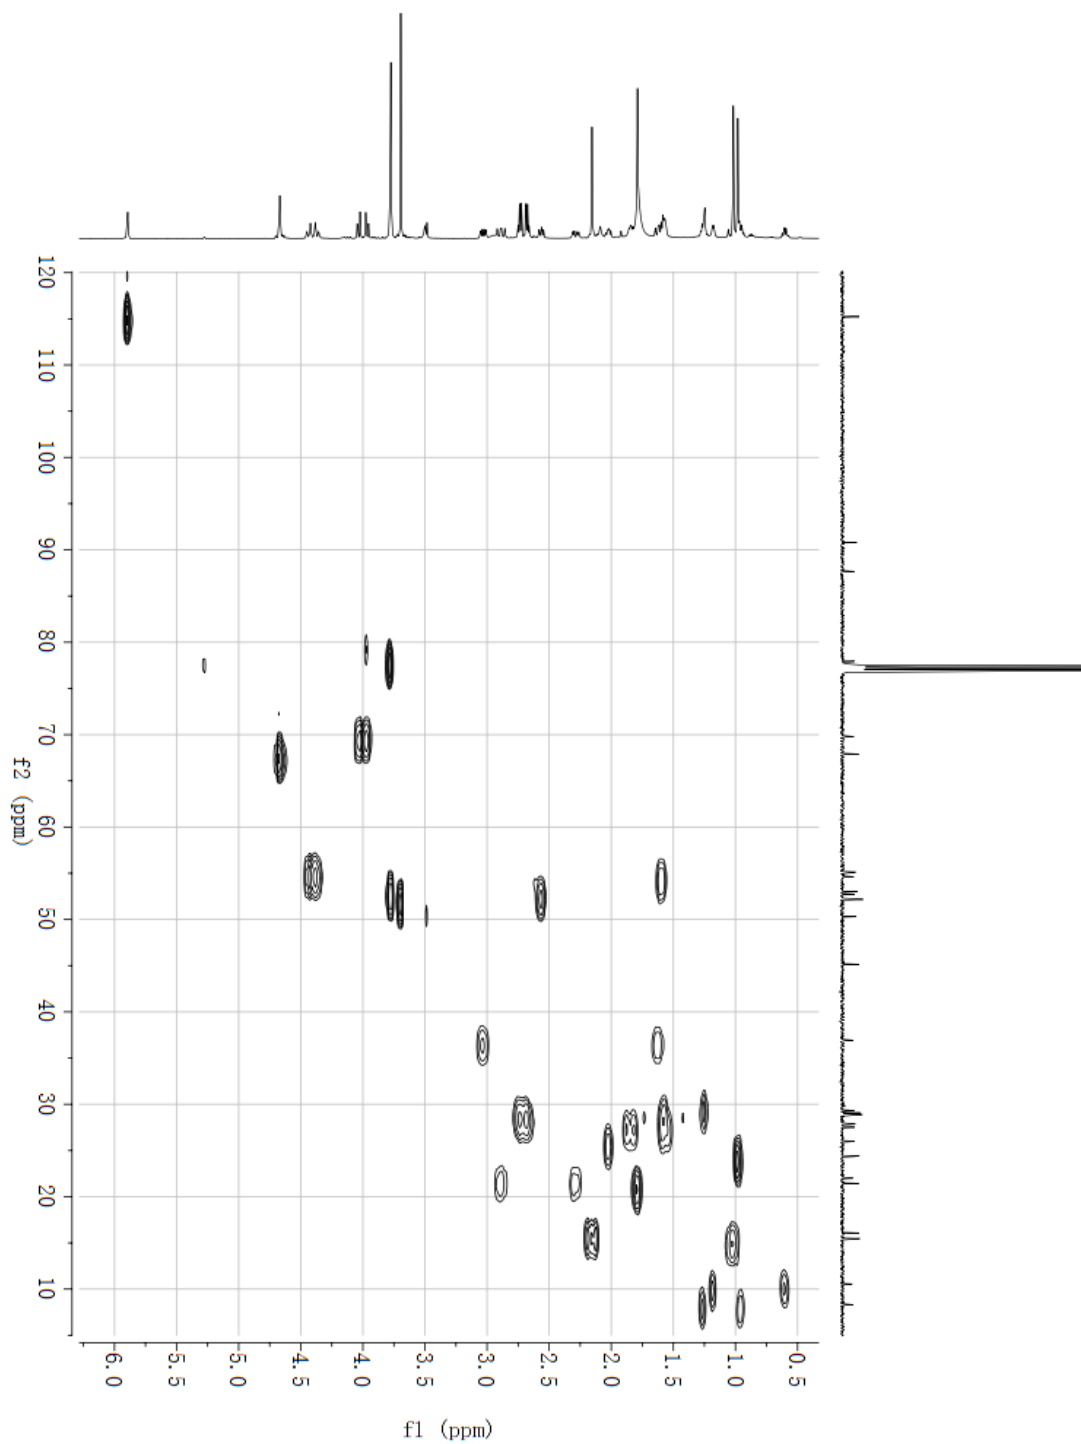

Figure S31. HMBC spectrum of fortunilide D (4) in CDCl<sub>3</sub>

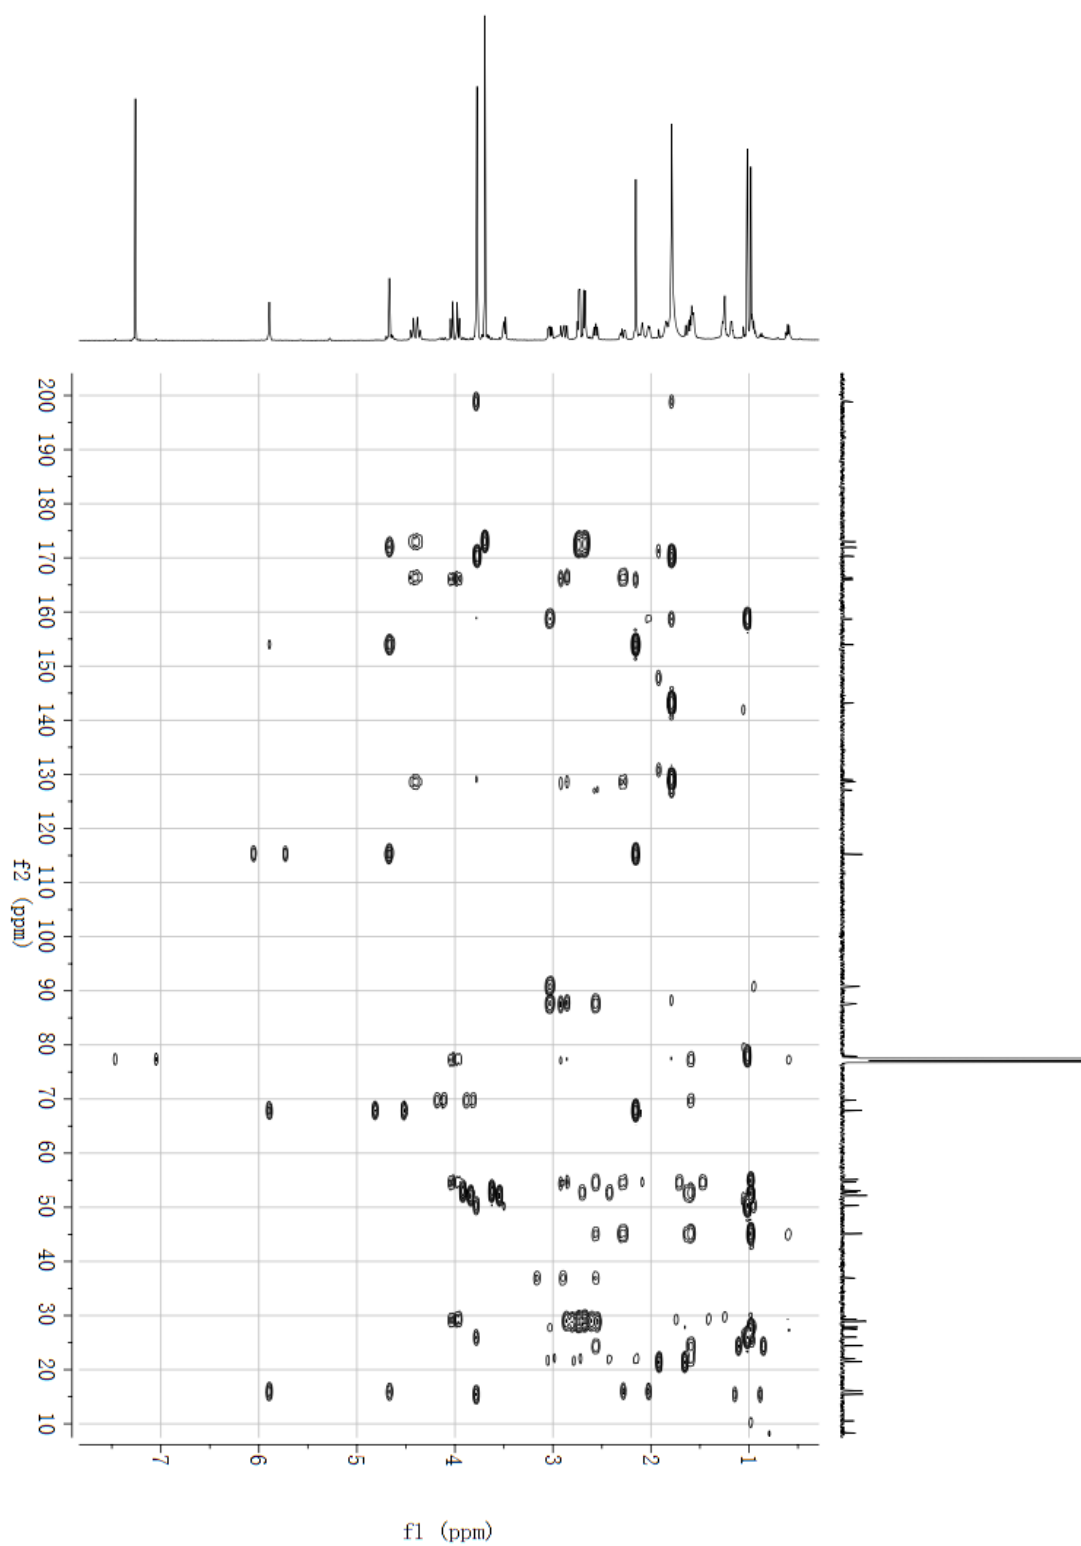

Figure S32. ROESY spectrum of fortunilide D (4)

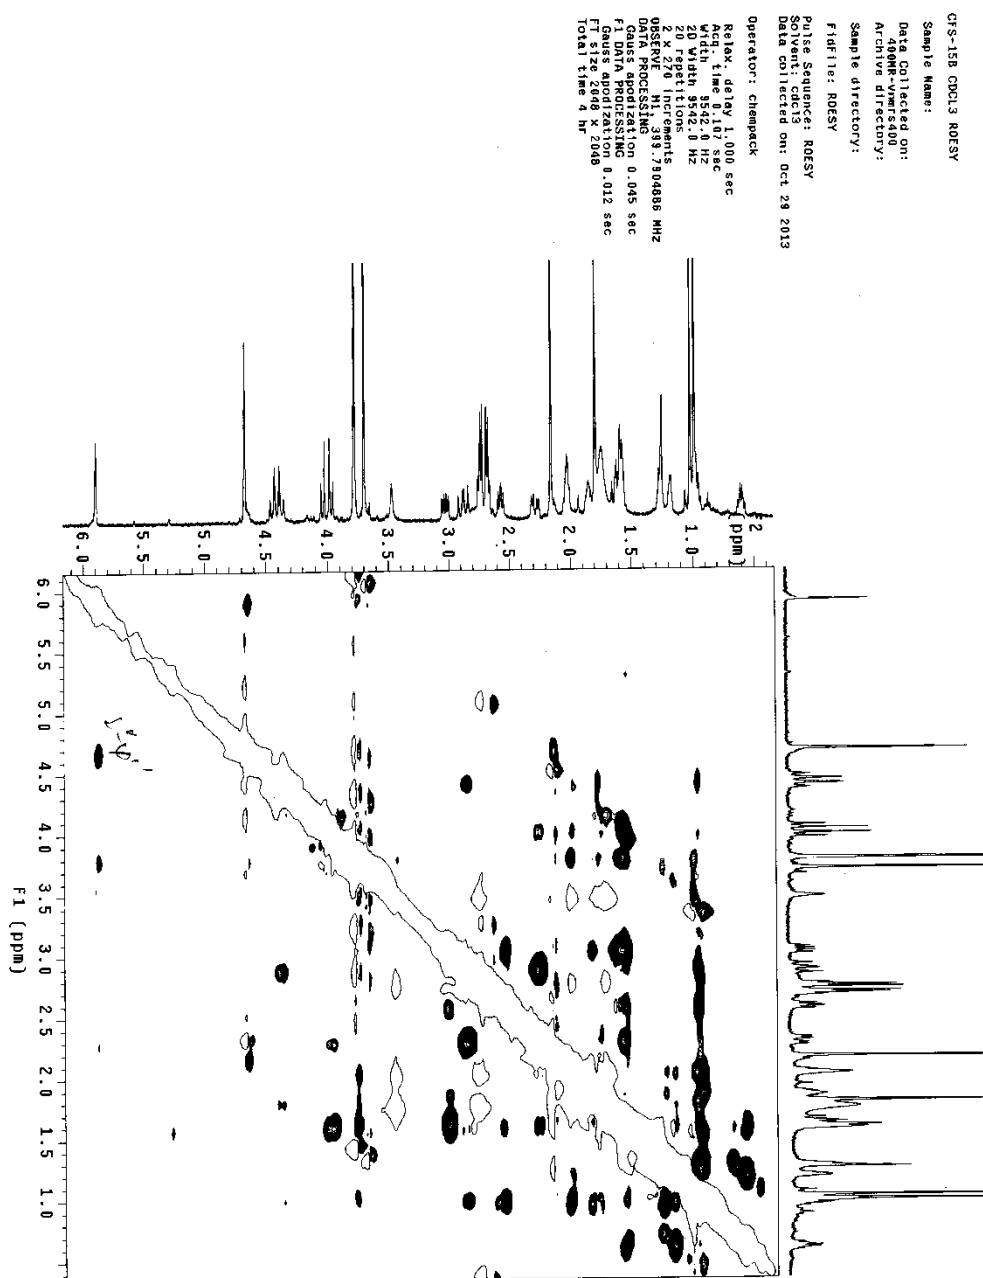

Figure S33. (+)-ESIMS spectrum of fortunilide D (4)

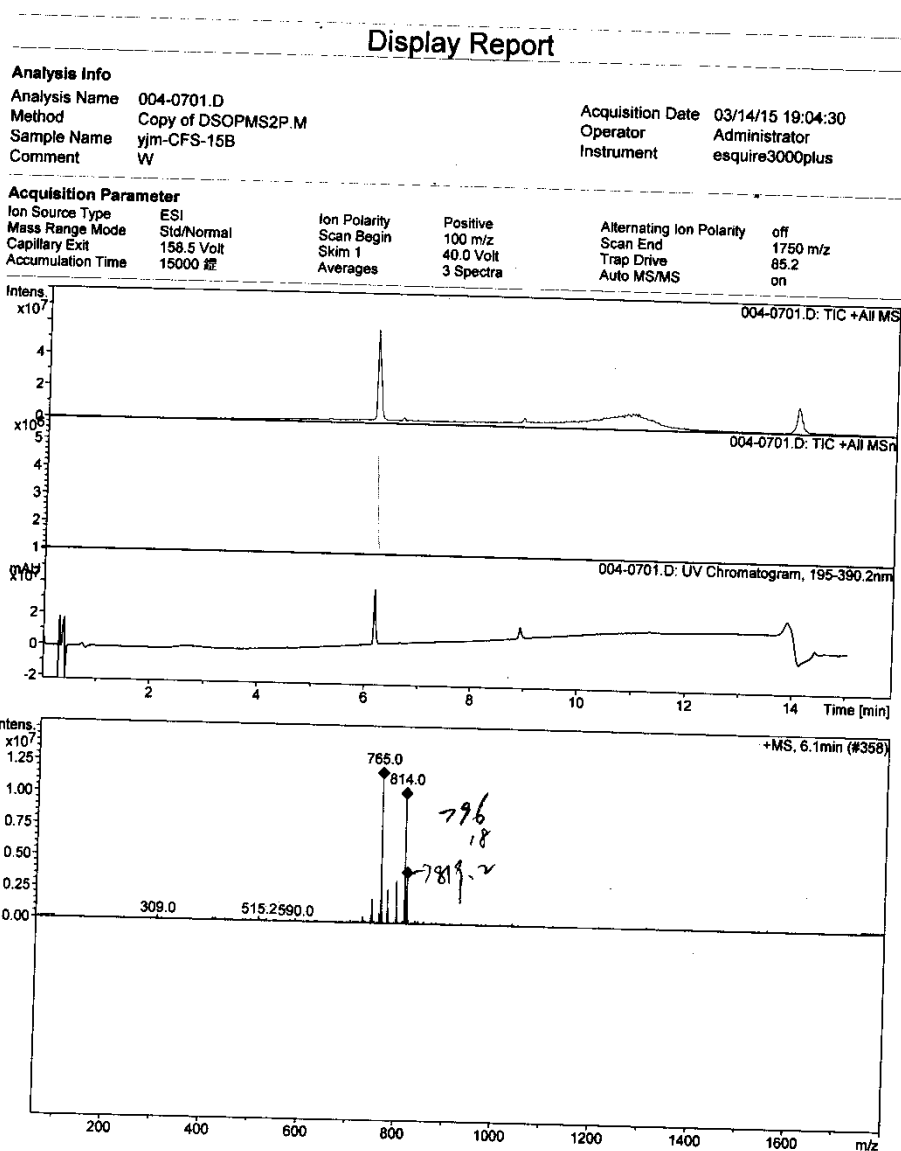

Figure S34. (-)-ESIMS spectrum of fortunilide D (4)

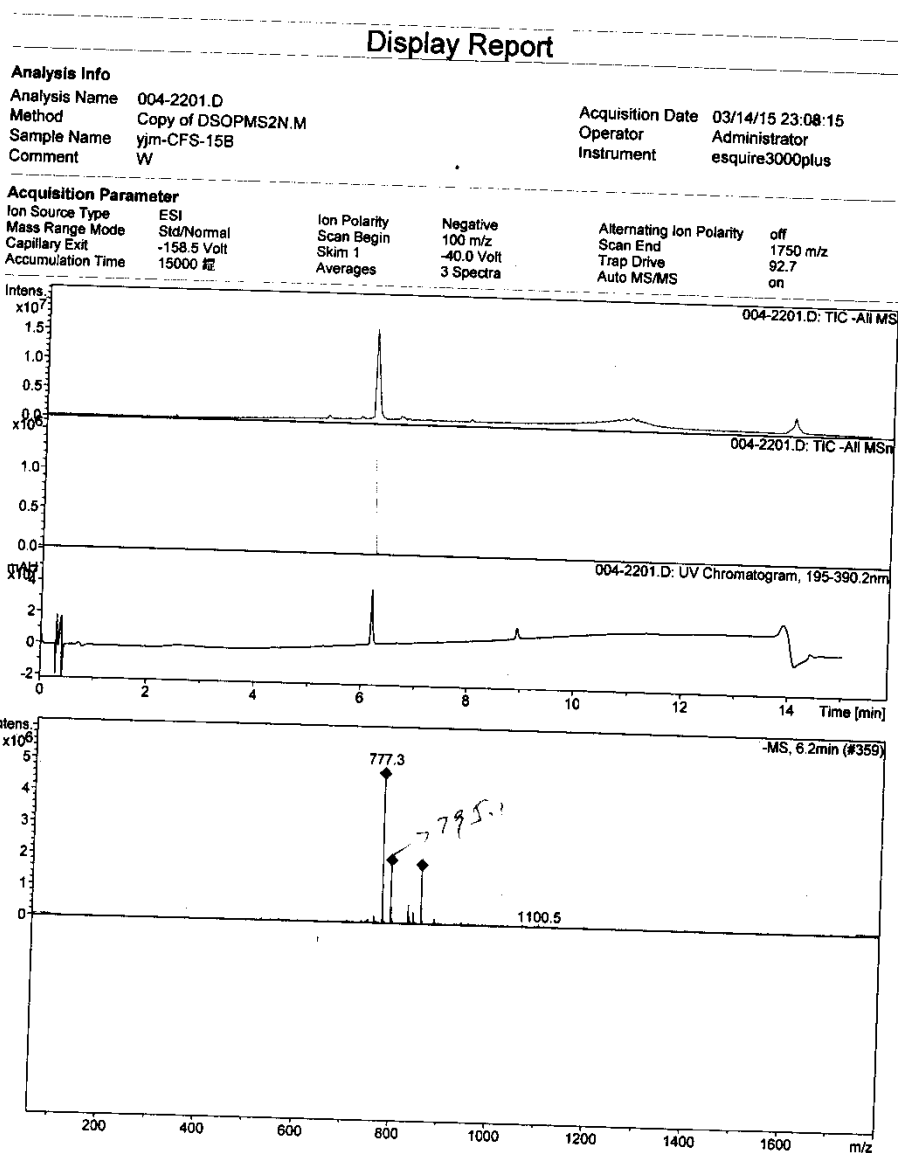

Figure S35. (+)-HRESIMS spectrum of fortunilide D (4)

Elemental Composition Report

Page 1

Single Mass Analysis

Tolerance = 4.0 PPM / DBE: min = -1.5, max = 50.0

Element prediction: Off

Number of isotope peaks used for i-FIT = 3

Monoisotopic Mass, Even Electron Ions

352 formula(e) evaluated with 3 results within limits (up to 50 closest results for each mass)

Elements Used:

C: 5-80 H: 2-120 O: 0-20 Na: 0-1

CFS-15B

LCT PXE KE324

13-Sep-2013

13:42:58

1: TOF MS ES+  
1.55e+004

CFS-15B\_0913 4 (0.070) AM2 (Ar,10000.0,0.00,1.00); ABS; Cm (4:21)

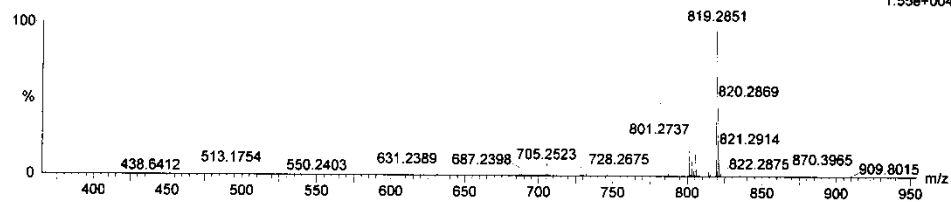

Minimum:

Maximum: 3.0 4.0 -1.5

Mass Calc. Mass mDa PPM DBE i-FIT i-FIT (Norm) Formula

| Mass     | Calc. Mass | mDa  | PPM  | DBE  | i-FIT | i-FIT (Norm) | Formula        |
|----------|------------|------|------|------|-------|--------------|----------------|
| 819.2851 | 819.2840   | 1.1  | 1.3  | 17.5 | 61.4  | 0.0          | C41 H48 O16 Na |
|          | 819.2864   | -1.3 | -1.6 | 20.5 | 65.7  | 4.3          | C43 H47 O16    |
|          | 819.2875   | -2.4 | -2.9 | 39.5 | 73.4  | 11.9         | C59 H40 O3 Na  |



Figure S36. IR spectrum of fortunilide D (4)

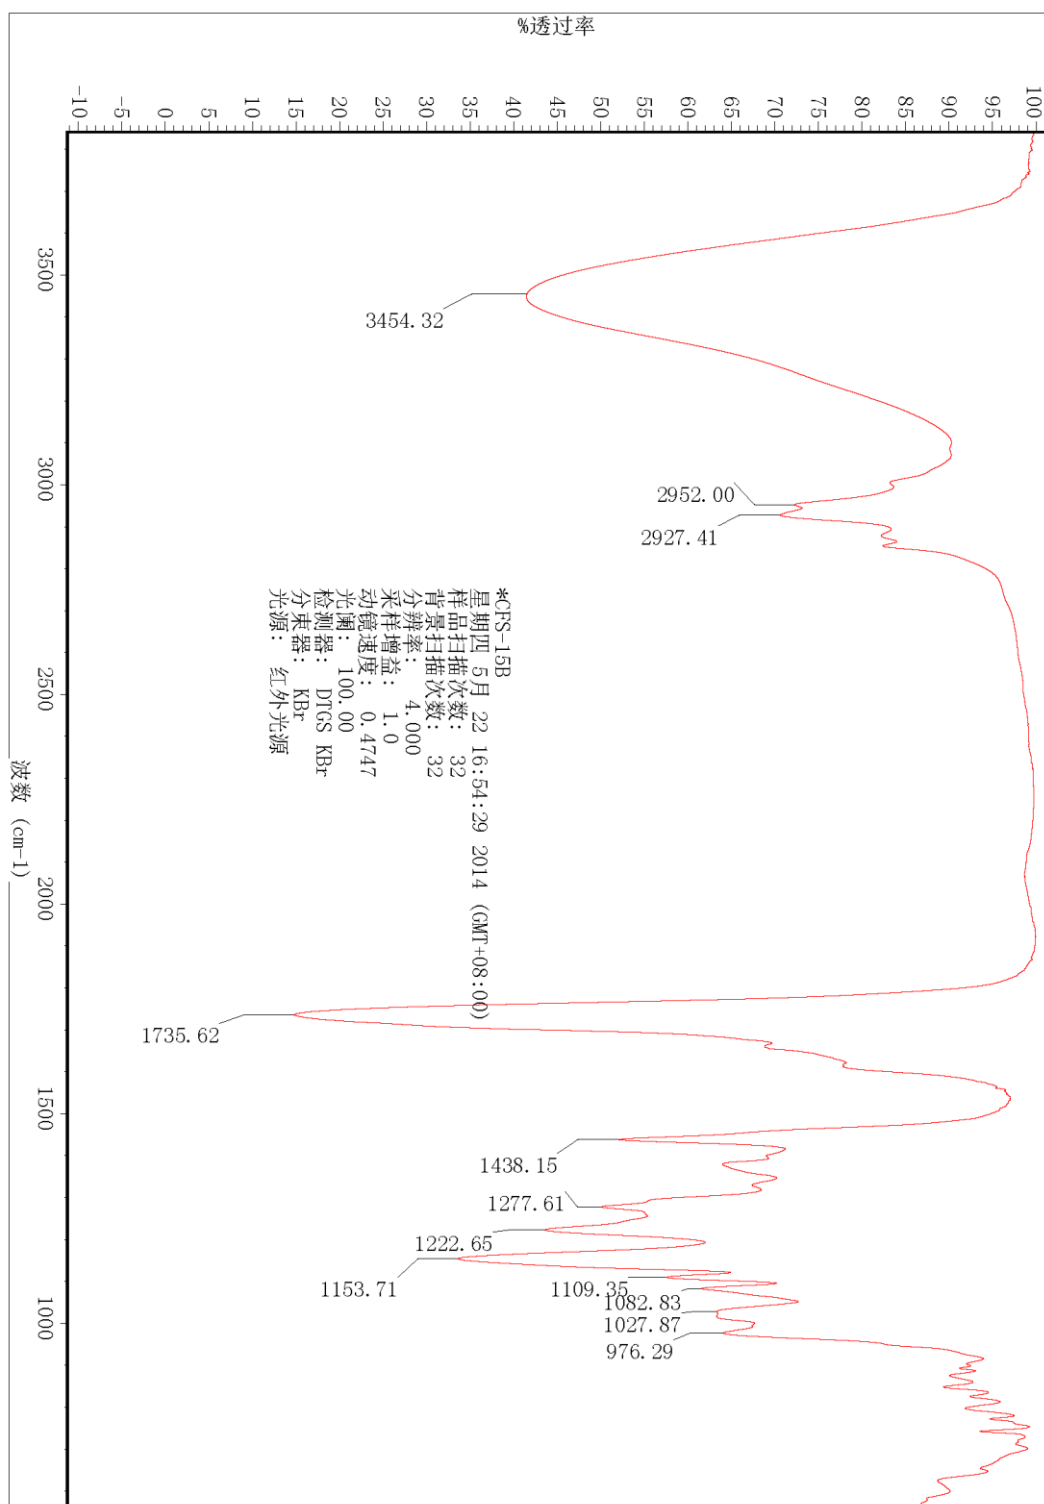

Figure S37. <sup>1</sup>H NMR spectrum of fortunilide E (5) in CDCl<sub>3</sub>

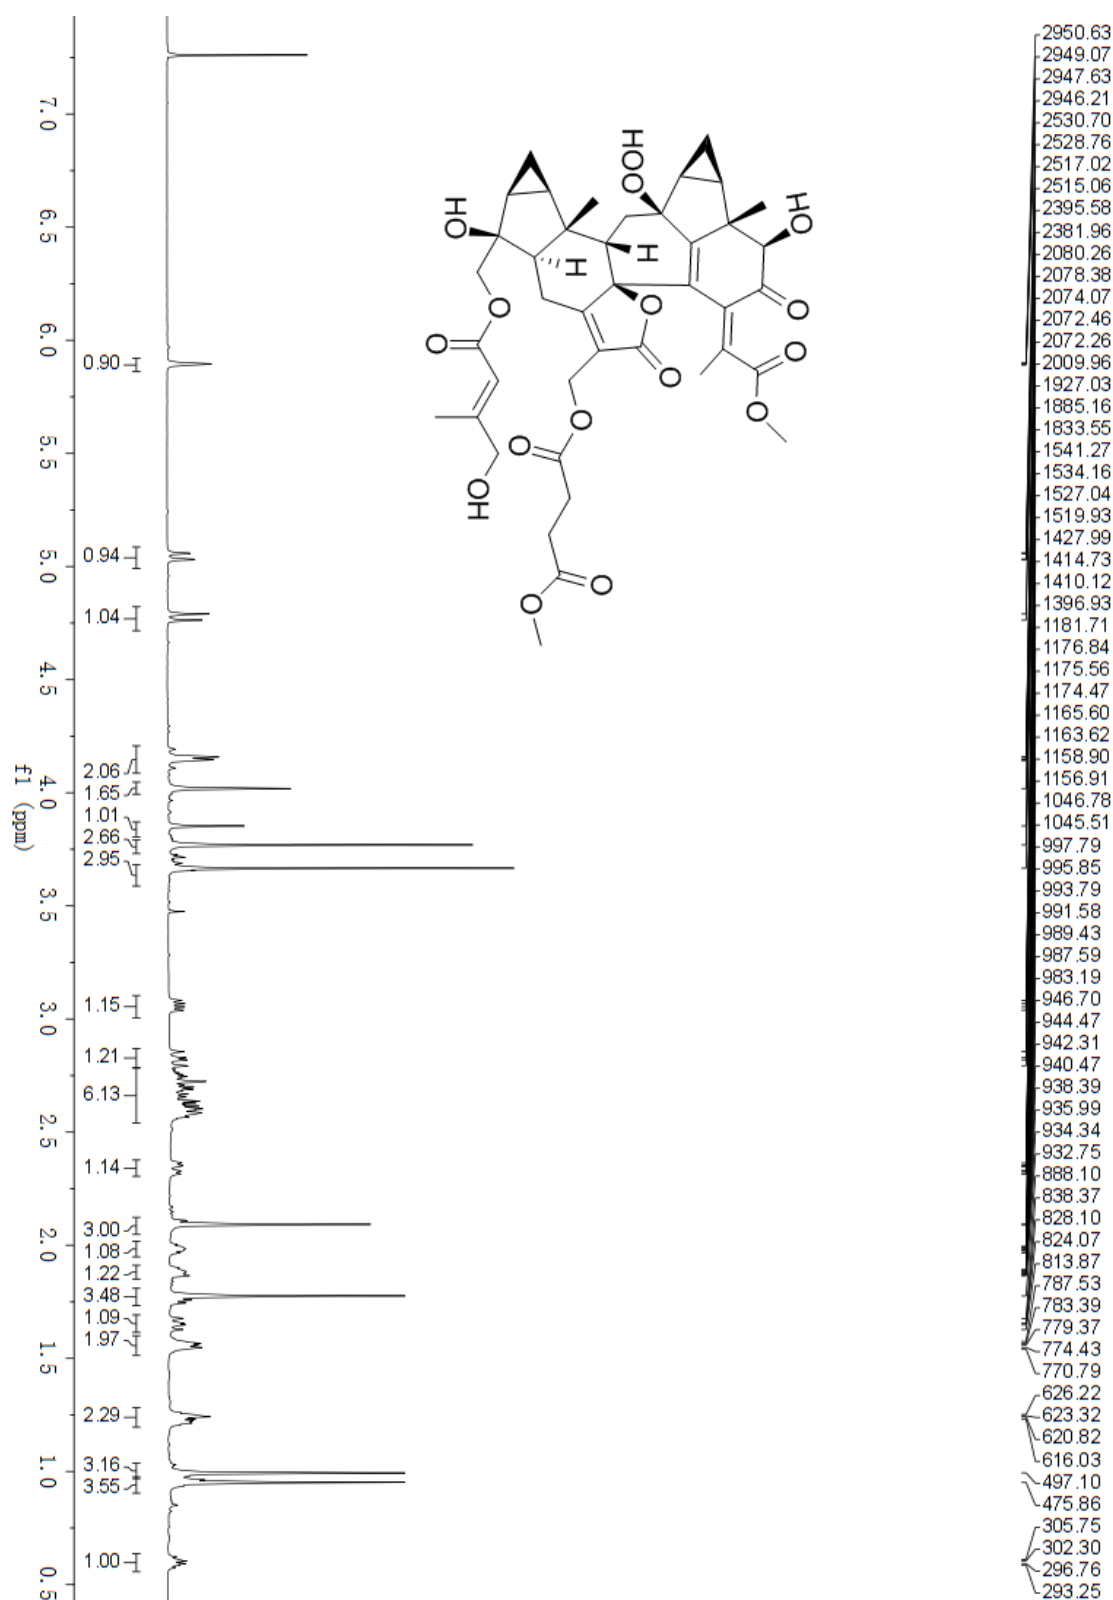

Figure S38.  $^{13}\text{C}$  NMR spectrum of fortunilide E (5) in  $\text{CDCl}_3$

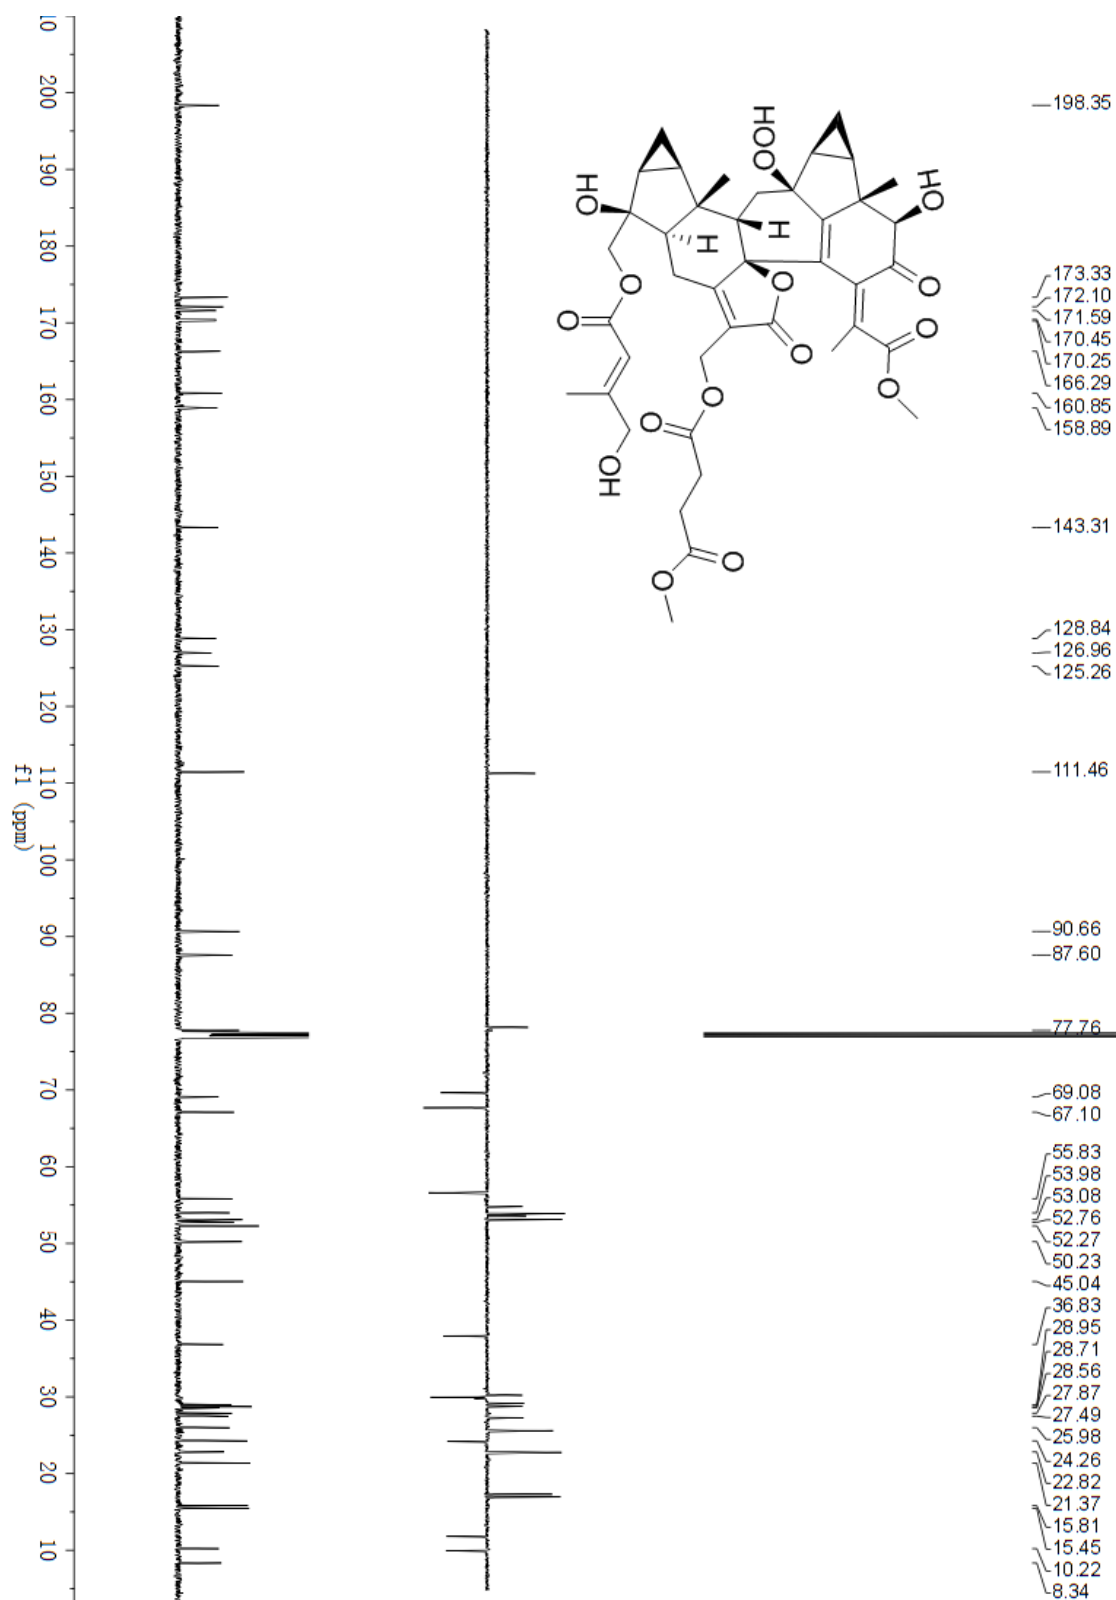

Figure S39. HSQC spectrum of fortunilide E (5) in CDCl<sub>3</sub>

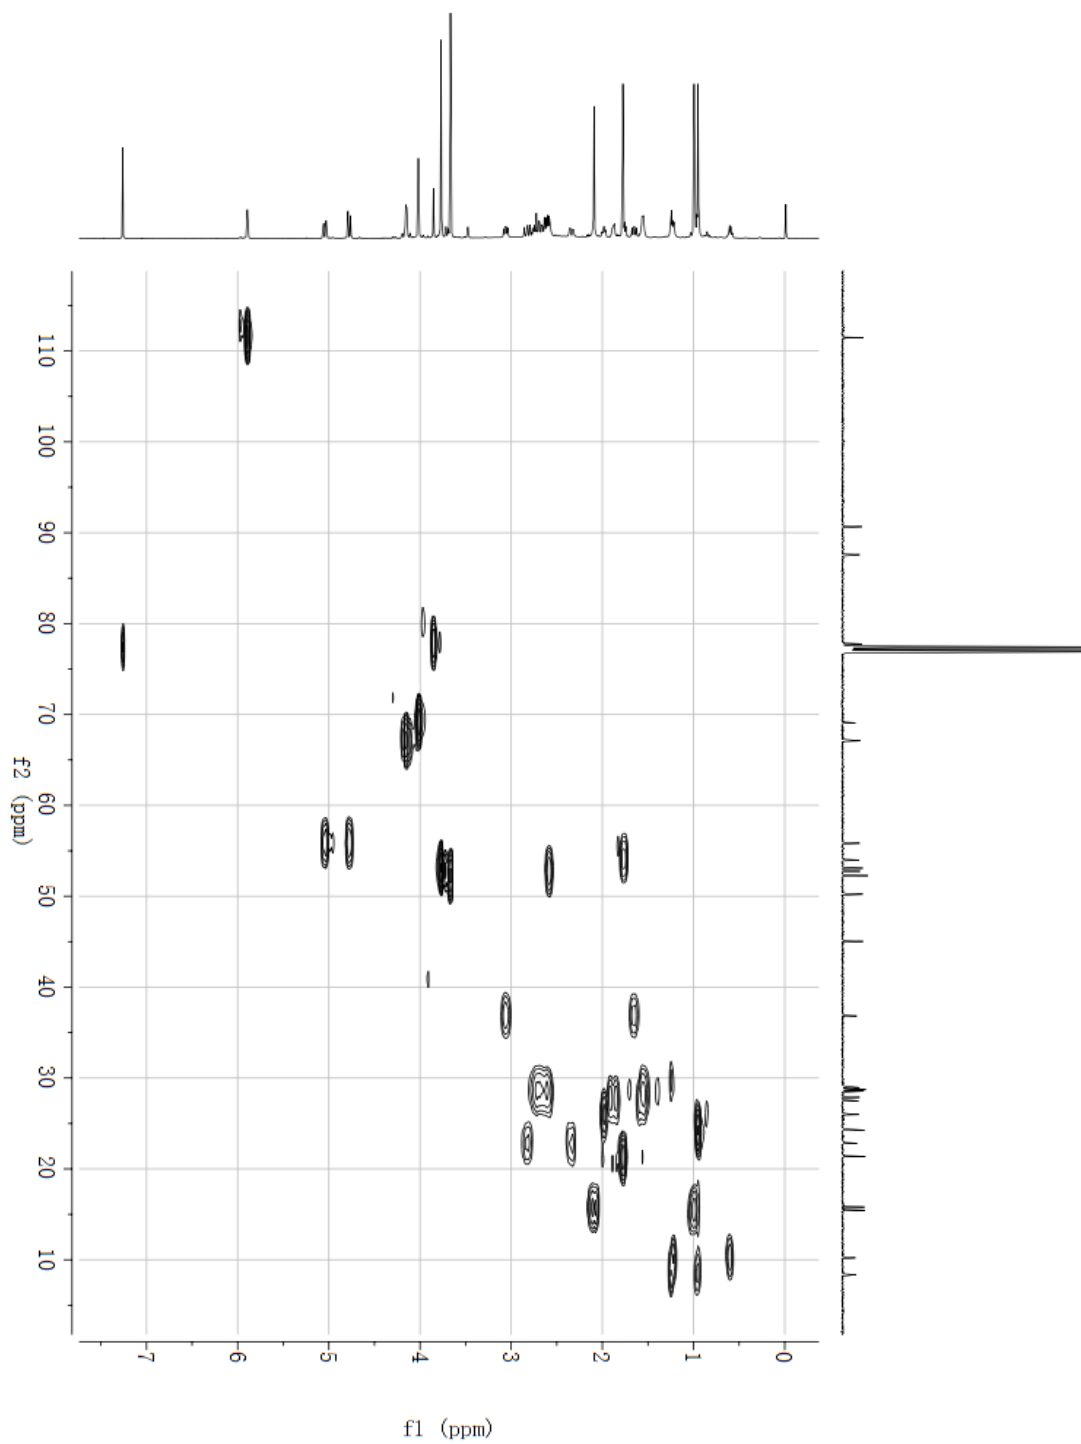

Figure S40. HMBC spectrum of fortunilide E (5) in CDCl<sub>3</sub>

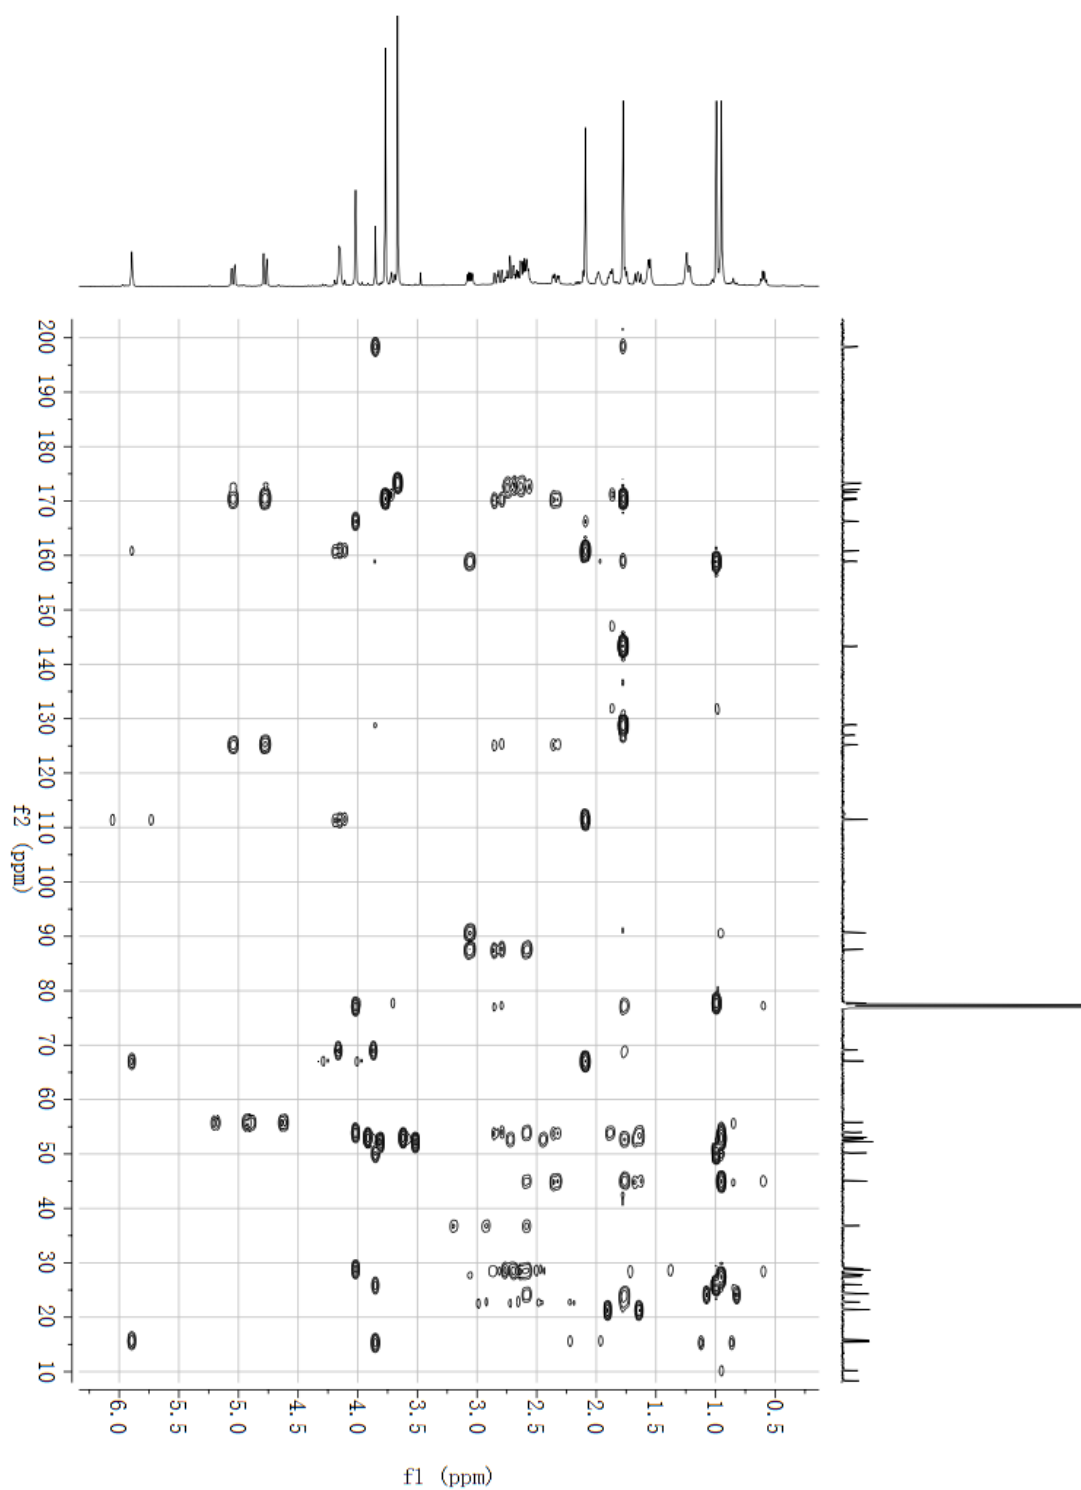

Figure S41. ROESY spectrum of fortunilide E (5)

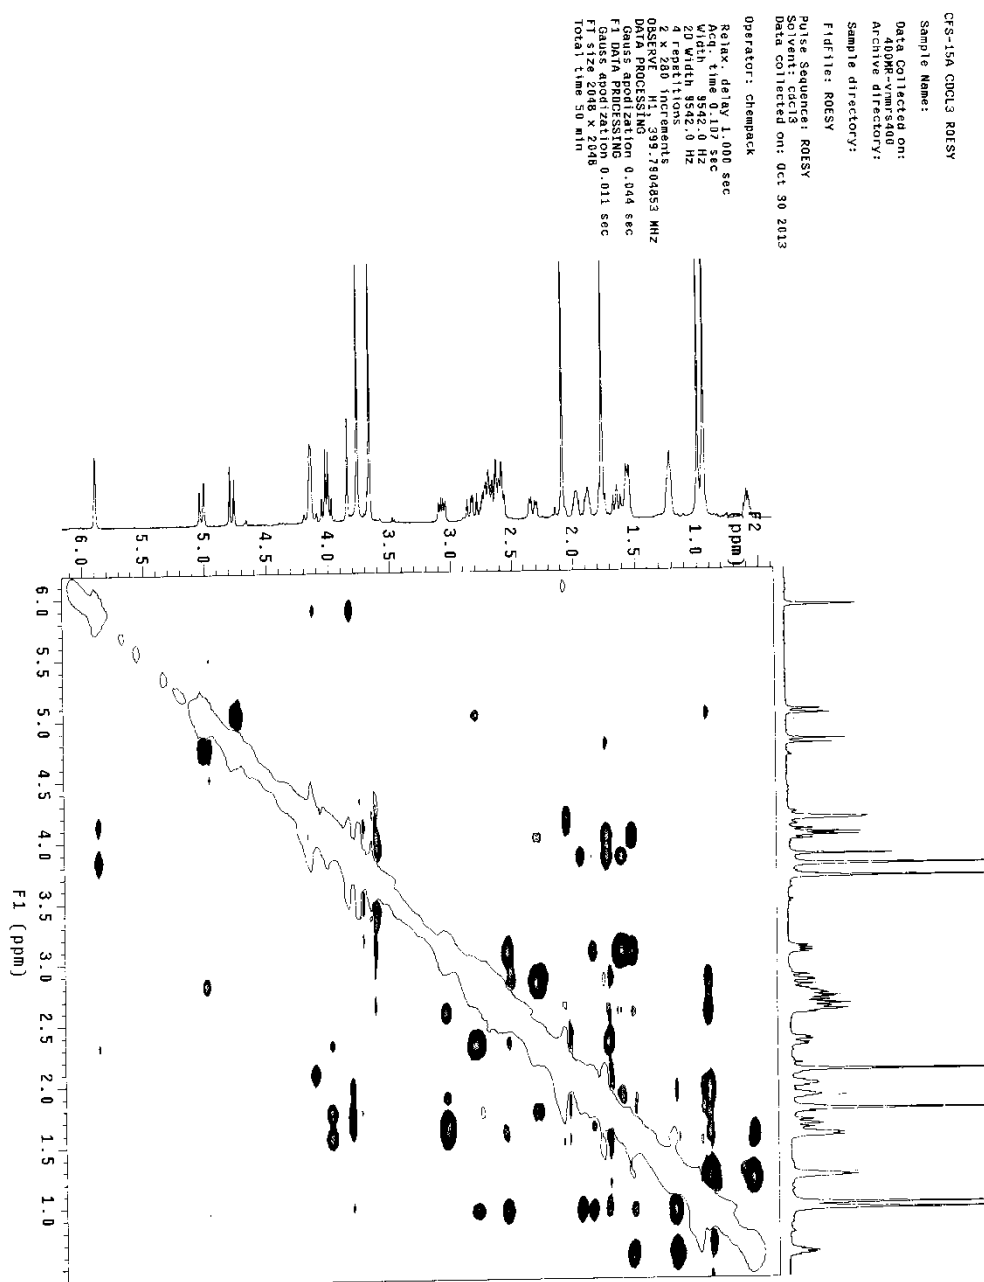

Figure S42. (+)-ESIMS spectrum of fortunilide E (5)

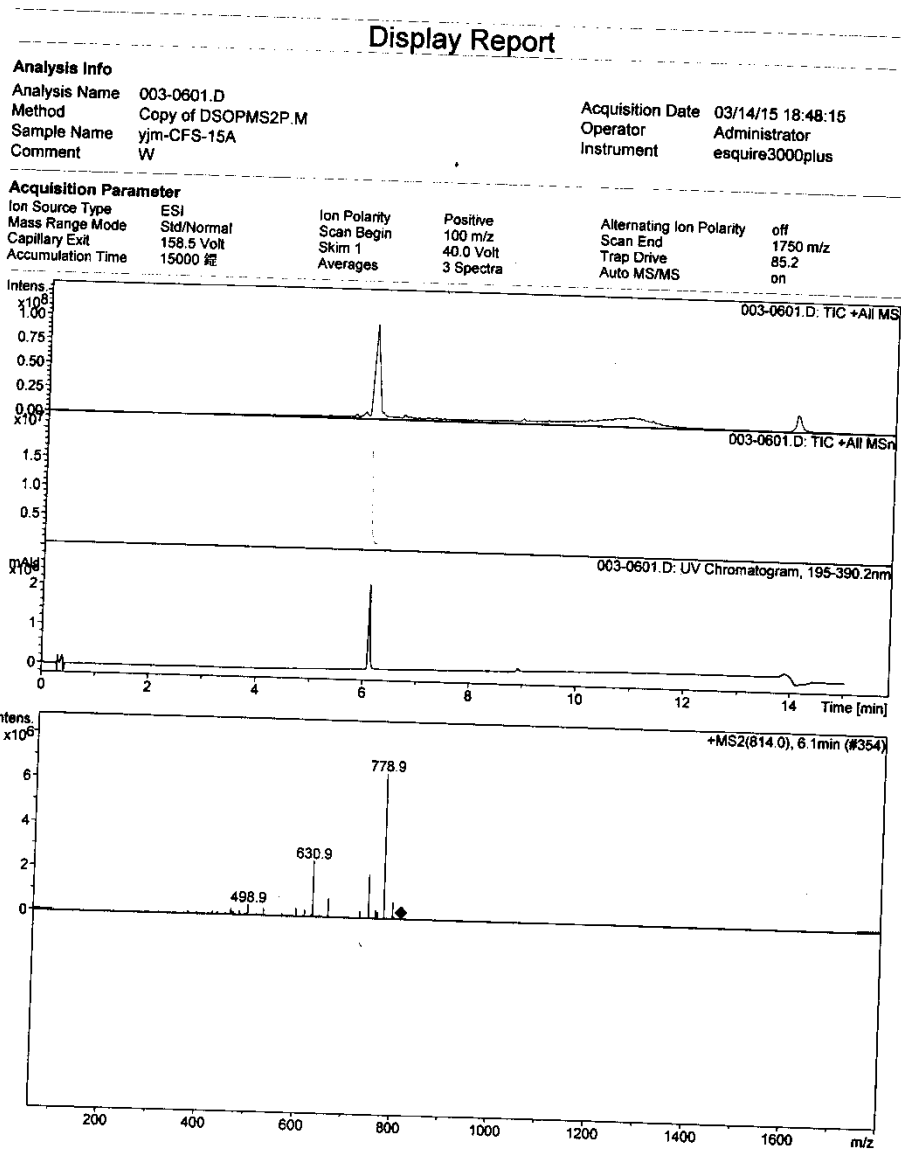

Figure S43. (-)-ESIMS spectrum of fortunilide E (5)

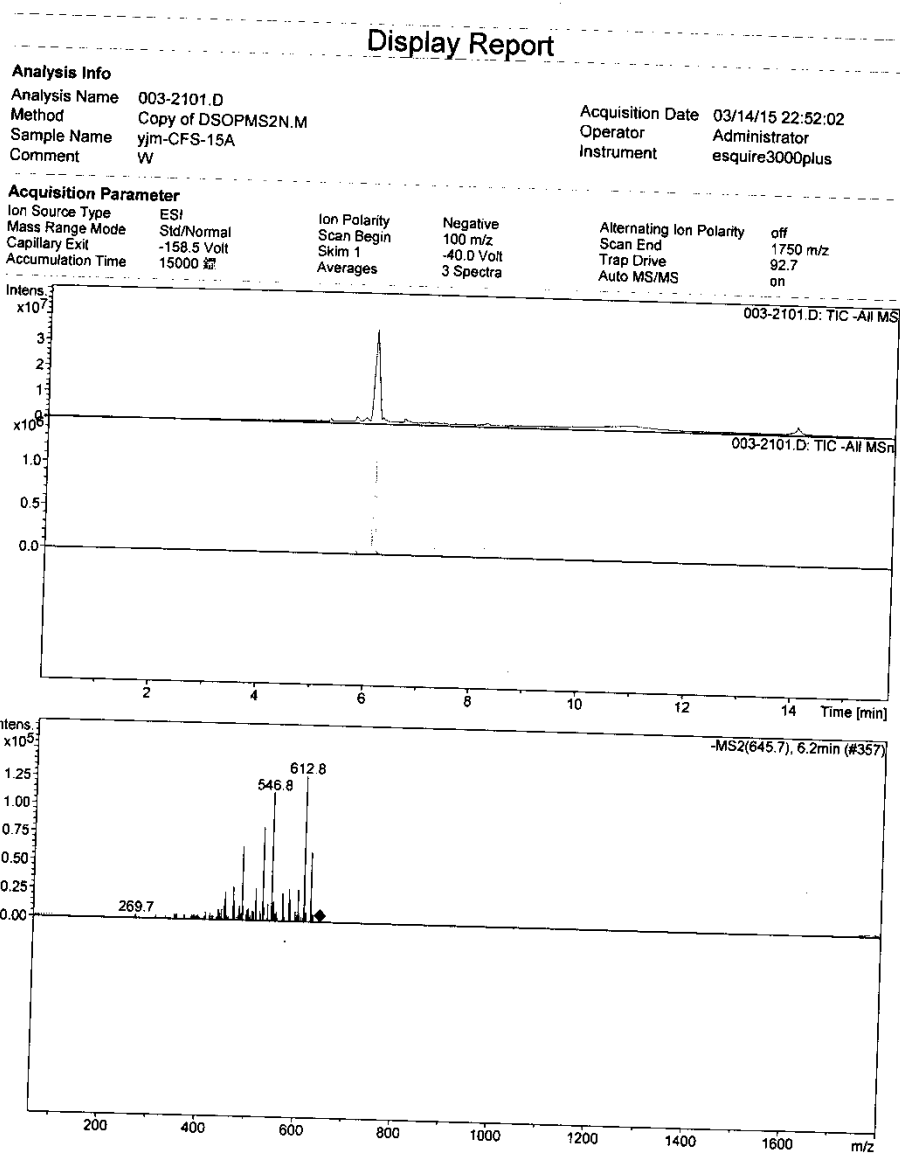



Figure S44. (+)-HRESIMS spectrum of fortunilide E (5)

Elemental Composition Report

Single Mass Analysis

Tolerance = 4.0 PPM / DBE: min = -1.5, max = 50.0

Element prediction: Off

Number of isotope peaks used for i-FIT = 3

Monoisotopic Mass, Even Electron Ions

352 formula(e) evaluated with 2 results within limits (up to 50 closest results for each mass)

Elements Used:

C: 5-80 H: 2-120 O: 0-20 Na: 0-1

CFS-15A

LCT PXE KE324

13-Sep-2013

13:38:06

CFS-15A\_0913 4 (0.070) AM2 (Ar.10000.0,0.00,1.00); ABS; Cm (2:19)

1: TOF MS ES+

1.11e+004

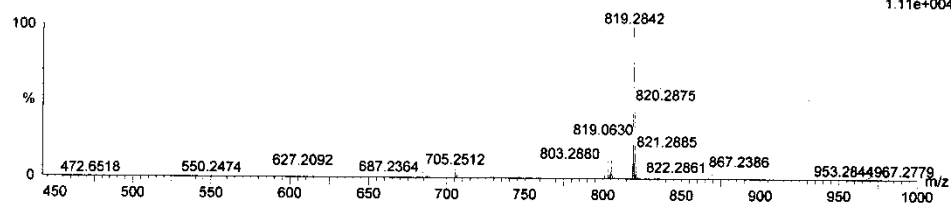

Minimum:

Maximum: 3.0 4.0 -1.5

50.0

| Mass     | Calc. Mass | mDa  | PPM  | DBE  | i-FIT | i-FIT (Norm) | Formula         |
|----------|------------|------|------|------|-------|--------------|-----------------|
| 819.2842 | 819.2840   | 0.2  | 0.2  | 17.5 | 61.1  | 0.0          | C41, H48 O16 Na |
|          | 819.2864   | -2.2 | -2.7 | 20.5 | 65.5  | 4.4          | C43 H47 O16     |

Figure S45. IR spectrum of fortunilide E (5)

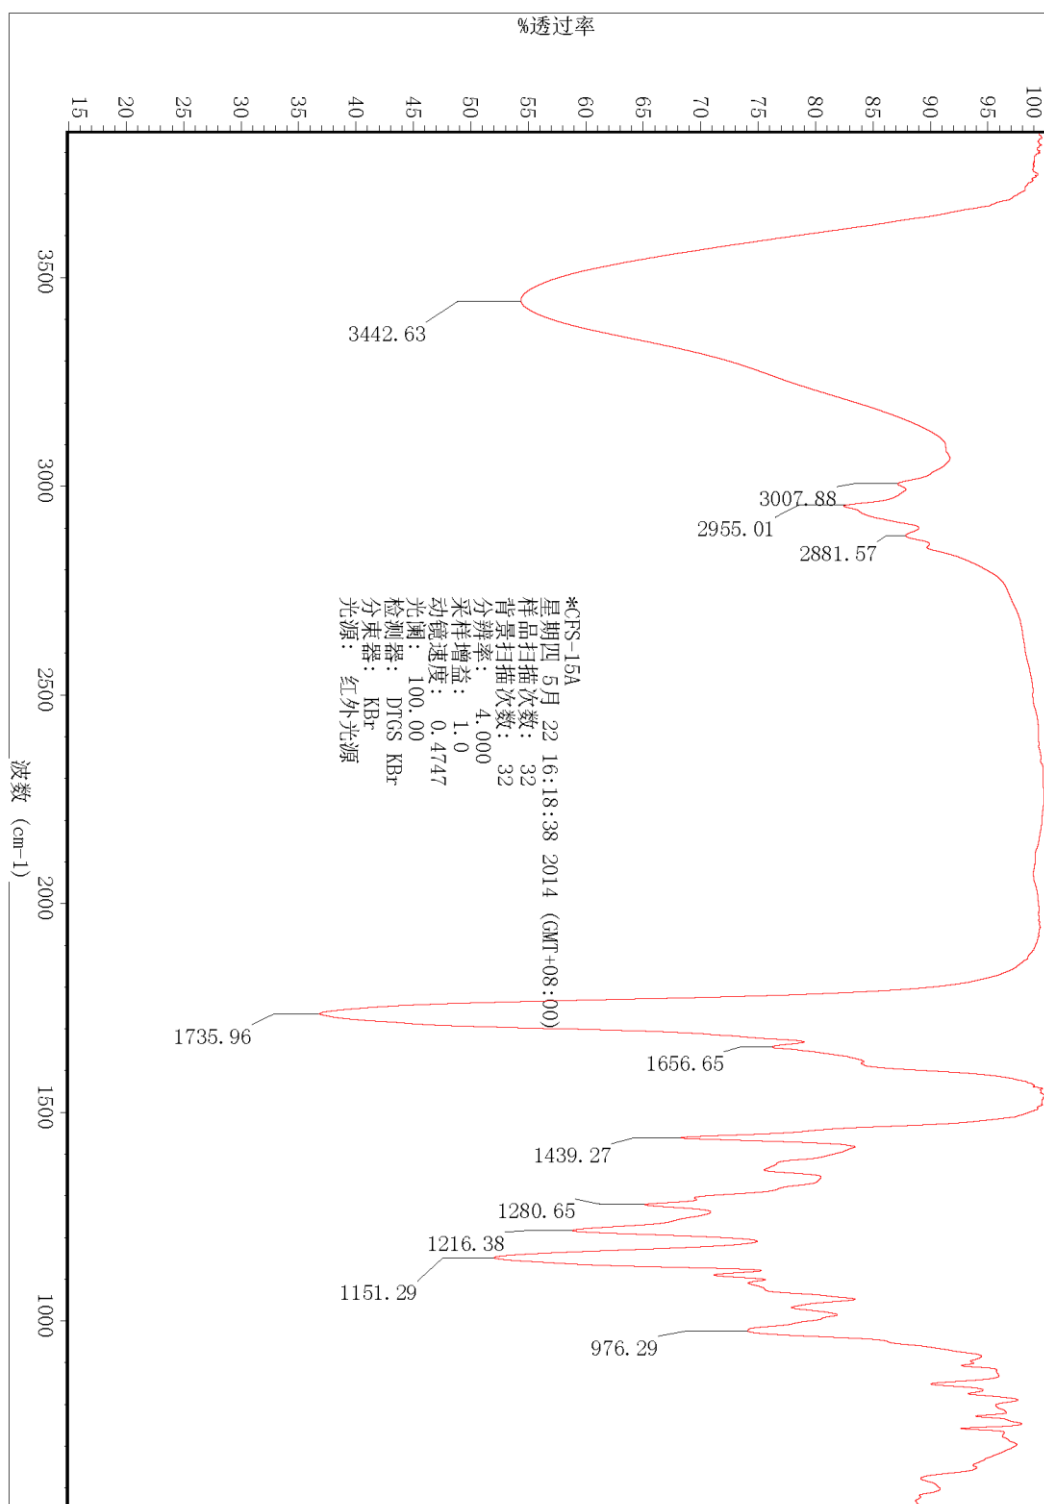

Figure S46. <sup>1</sup>H NMR spectrum of fortunilide F (6) in CD<sub>3</sub>OD

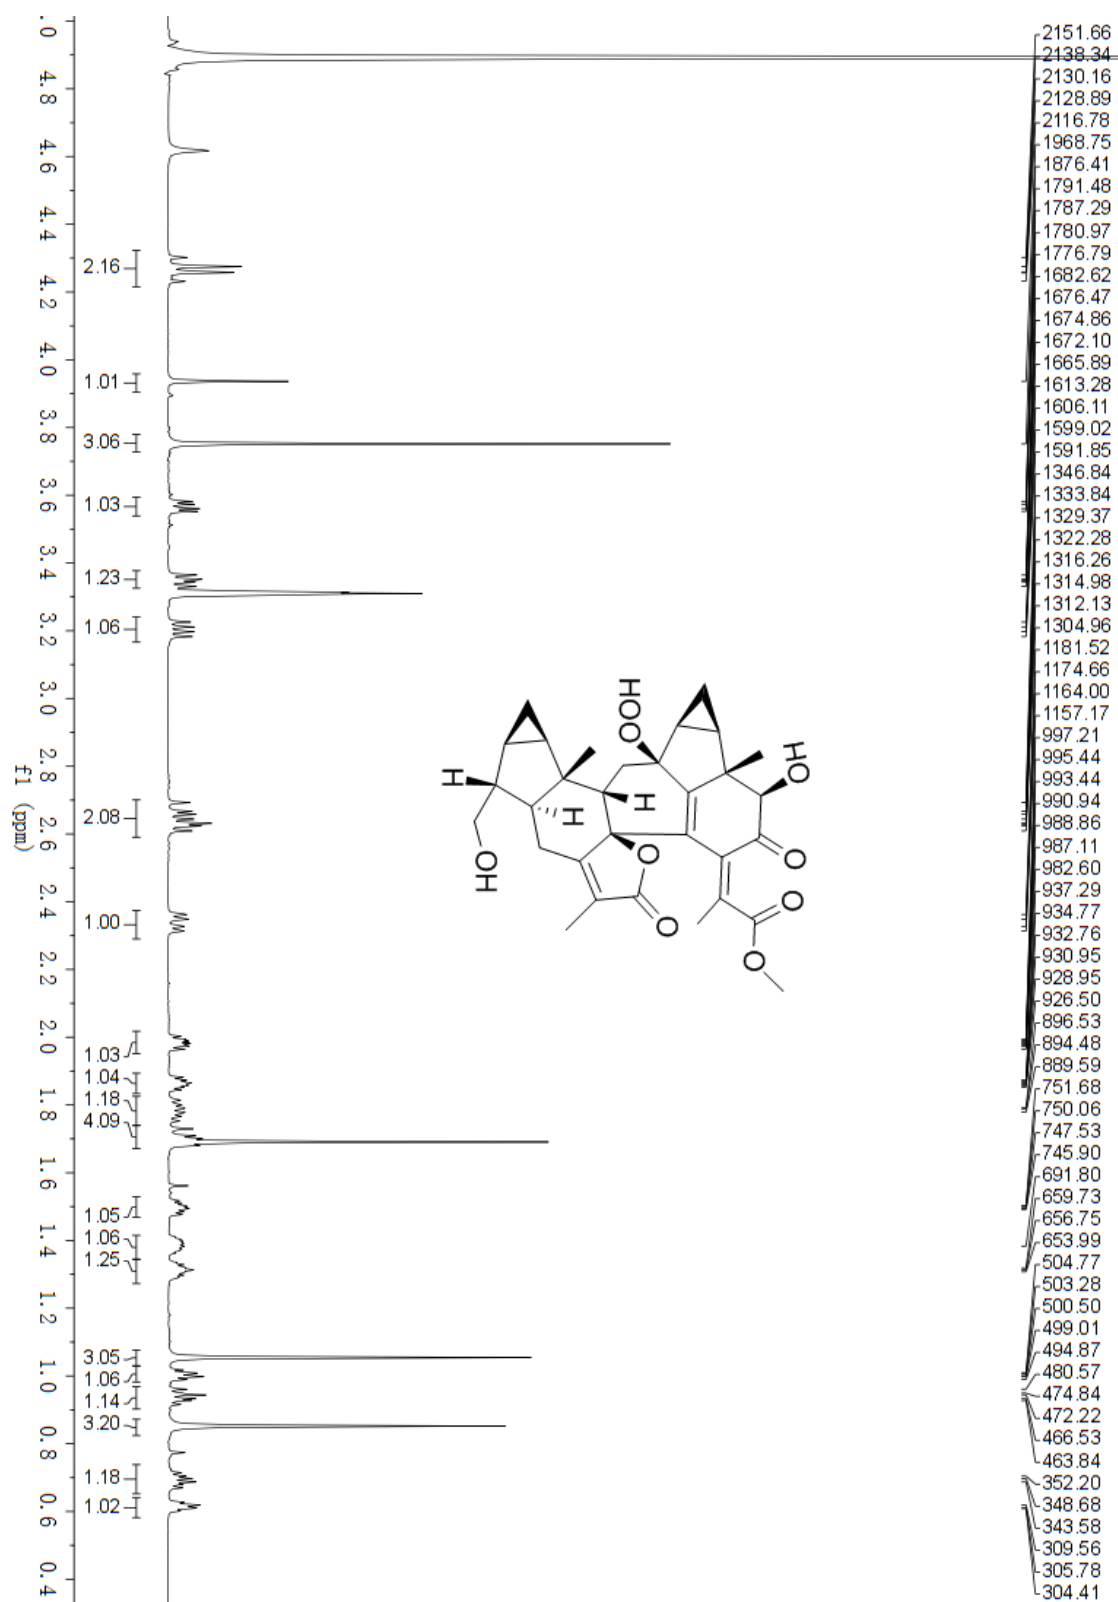

Figure S47.  $^{13}\text{C}$  NMR spectrum of fortunilide F (6) in  $\text{CD}_3\text{OD}$

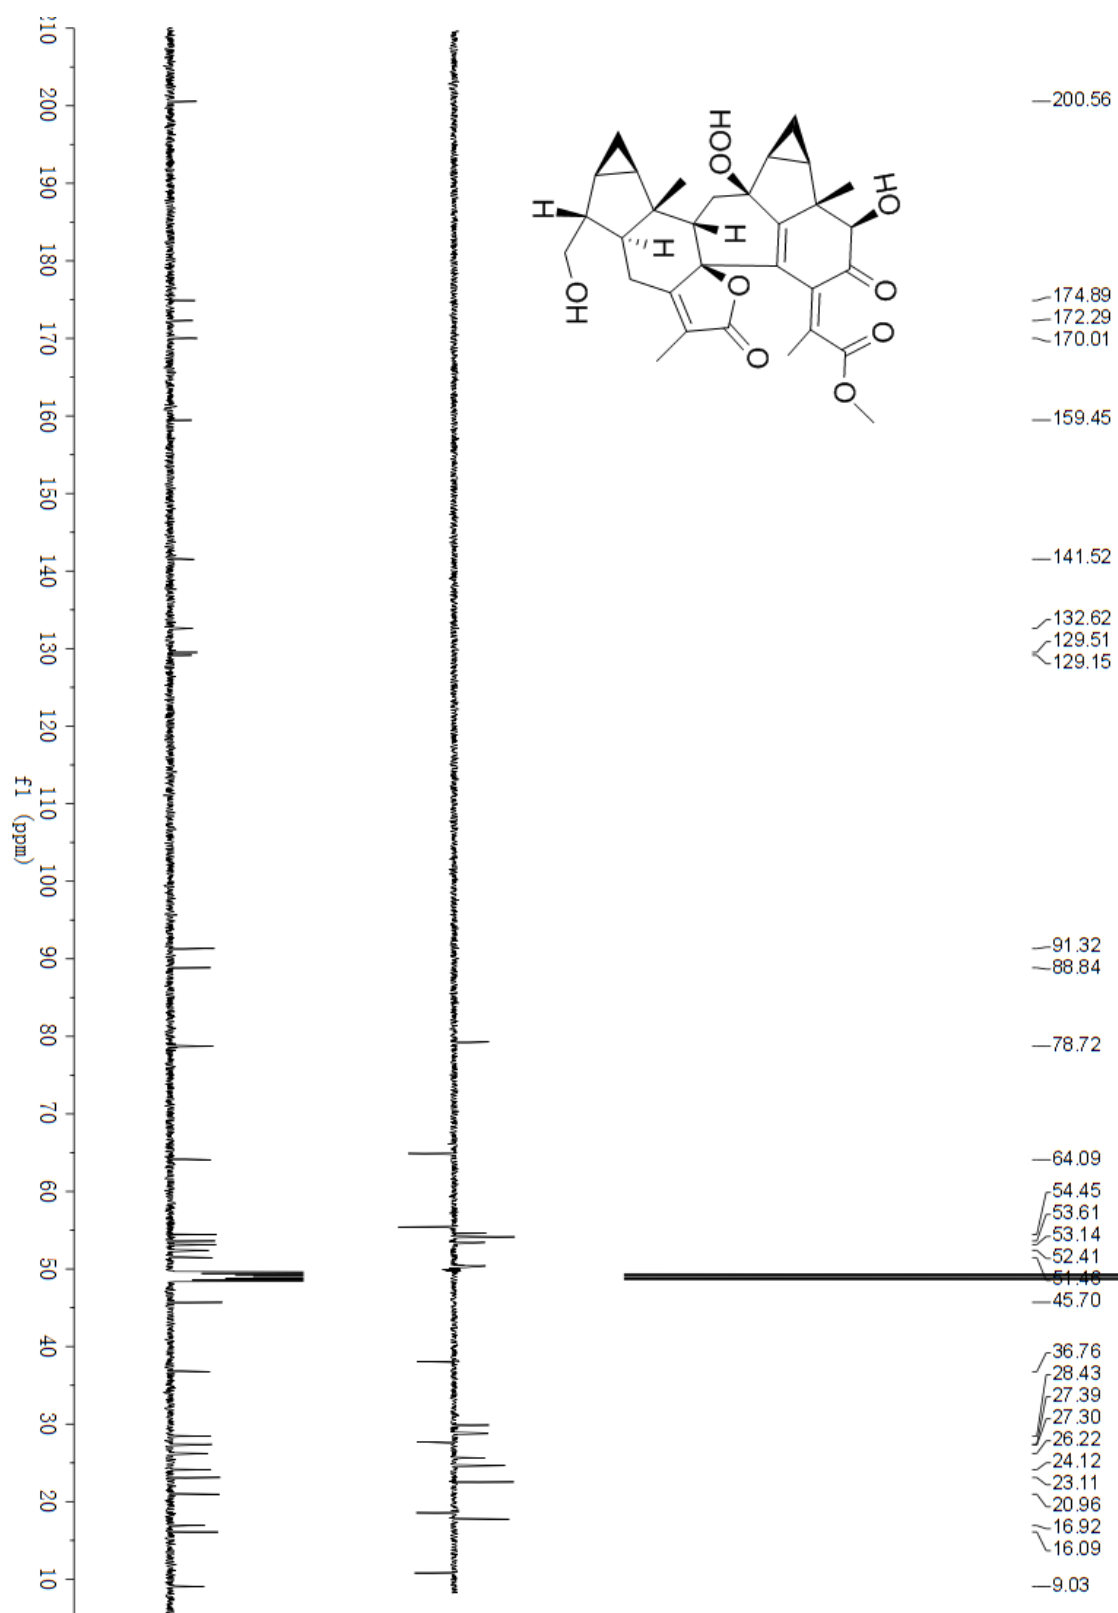

Figure S48. HSQC spectrum of fortunilide F (6) in CD<sub>3</sub>OD

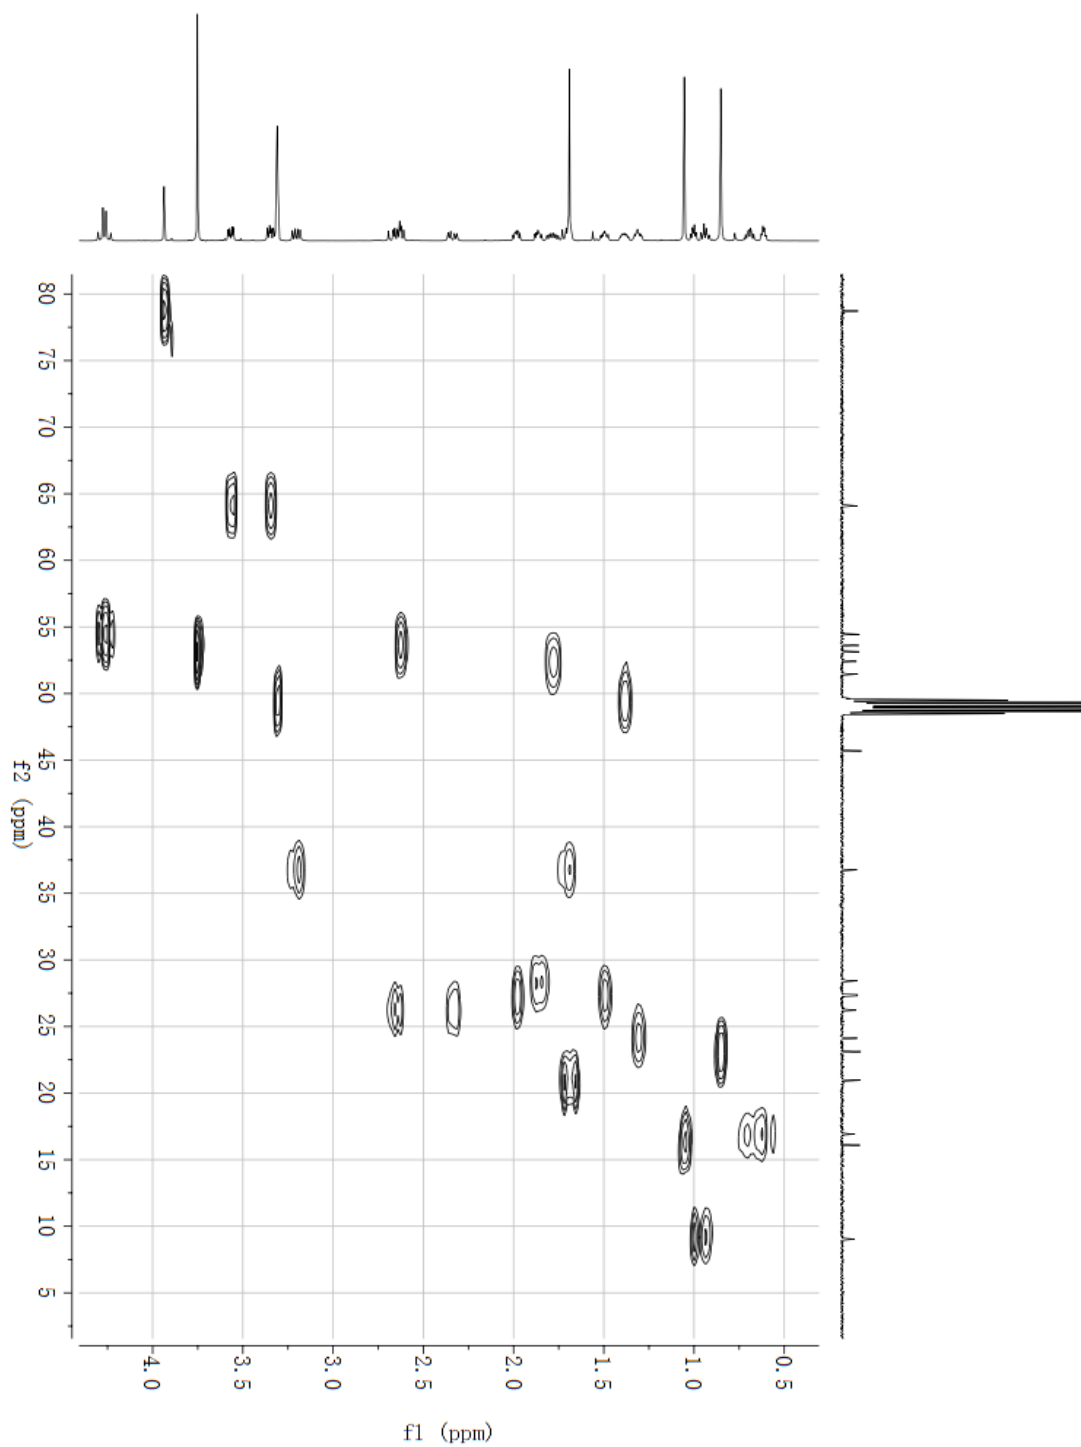

Figure S49. HMBC spectrum of fortunilide F (6) in CD<sub>3</sub>OD

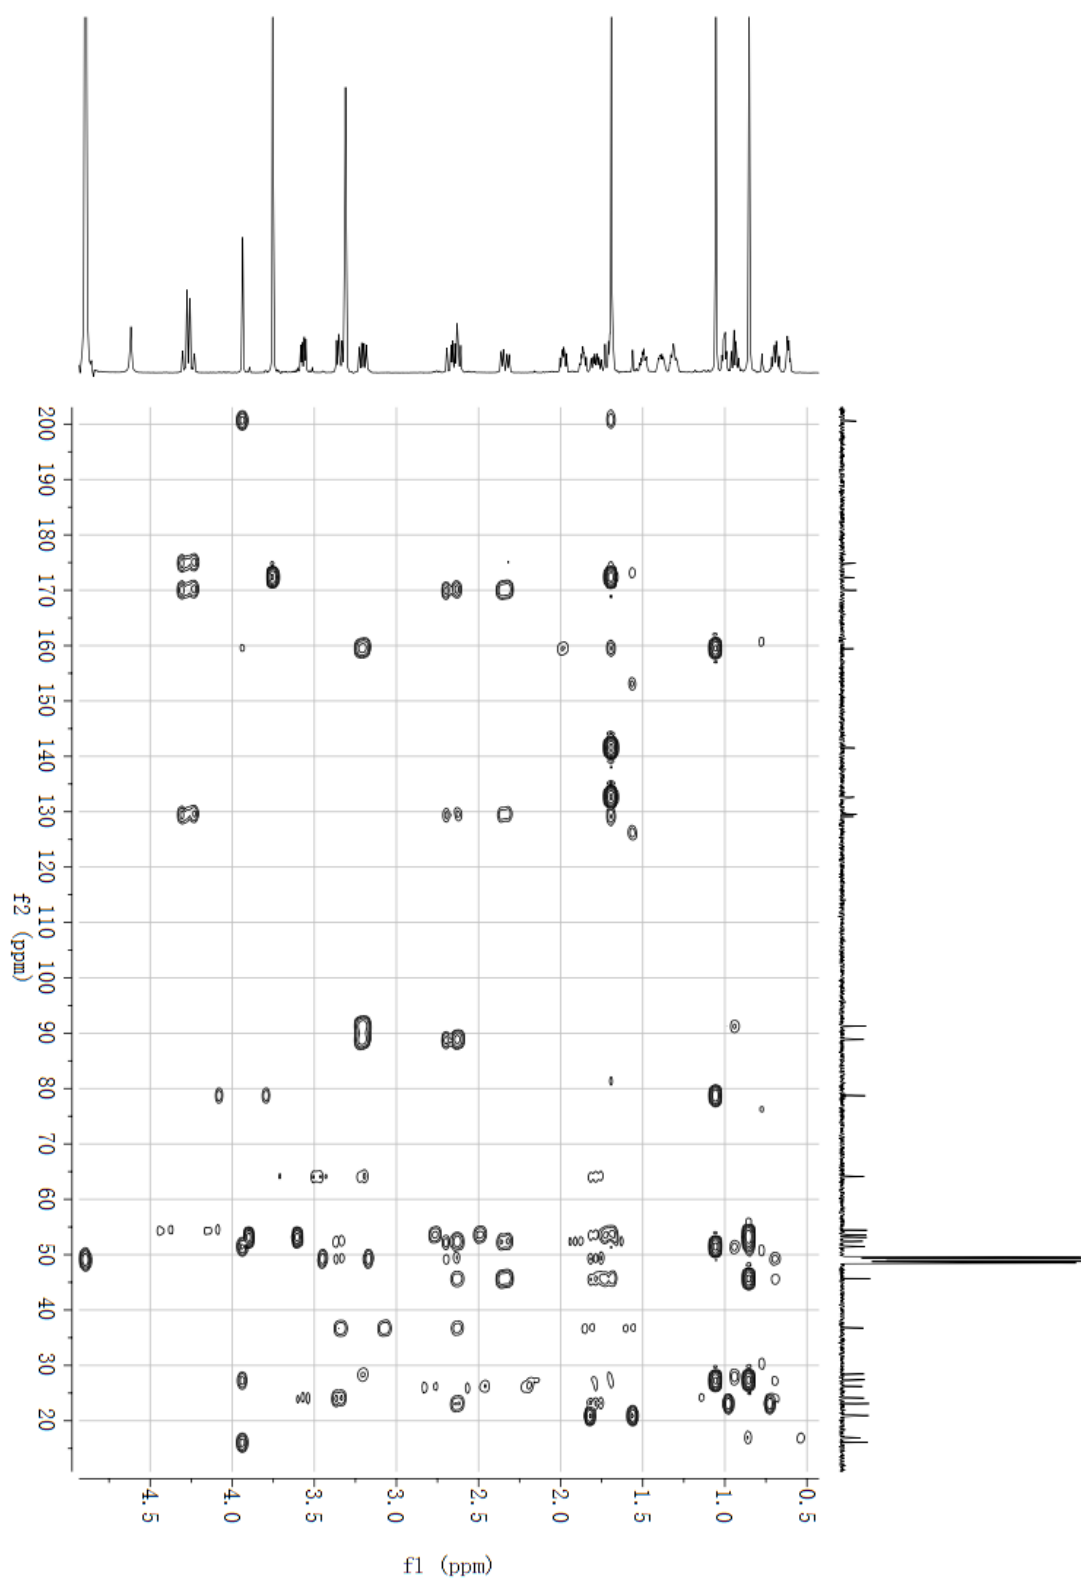

Figure S50. ROESY spectrum of fortunilide F (6)

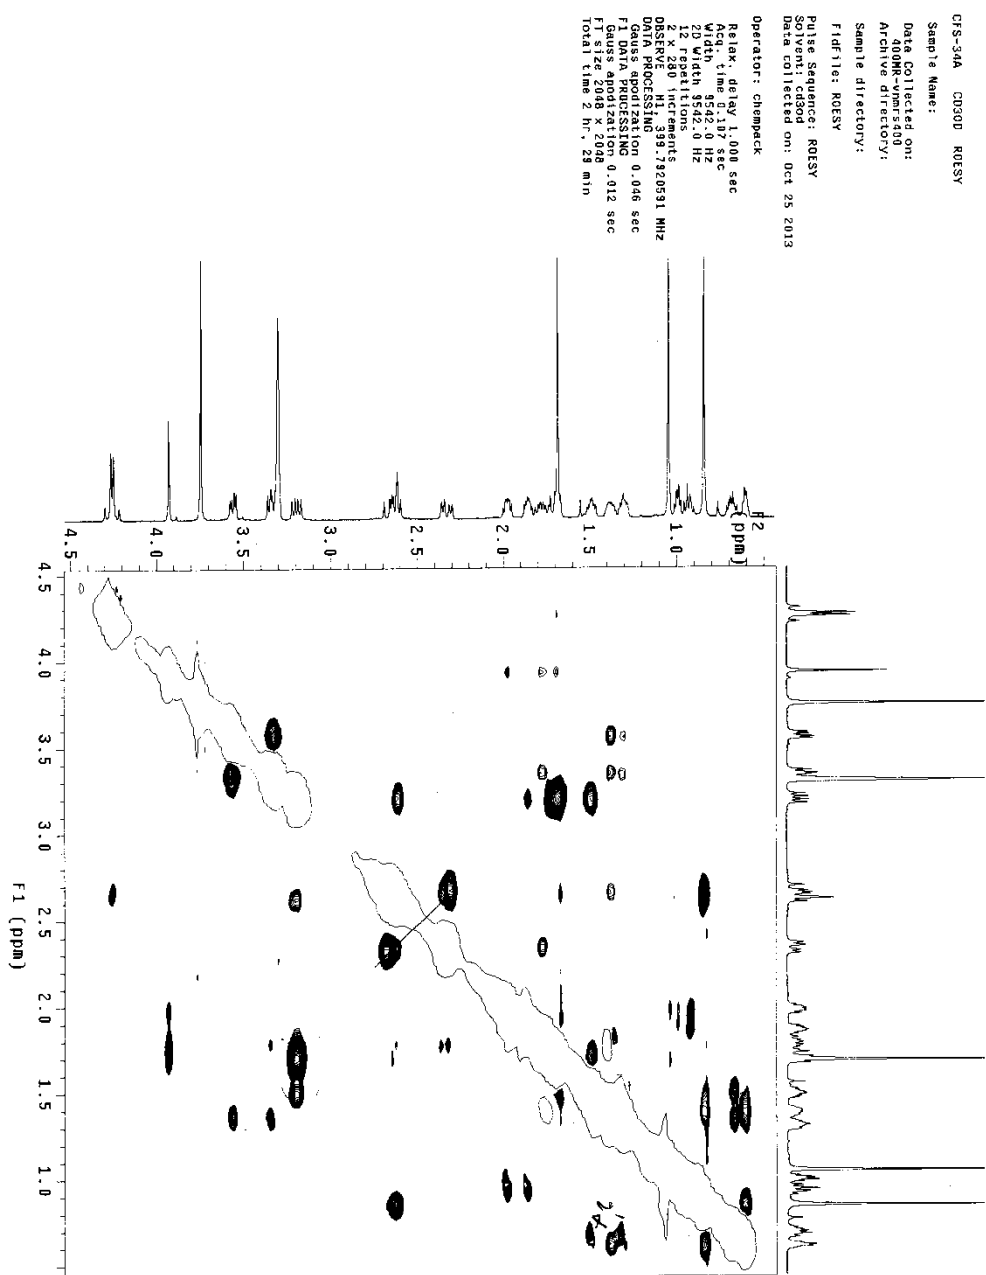

Figure S51. (+)-ESIMS spectrum of fortunilide F (6)

Display Report

Analysis Info

|               |                    |                  |                   |
|---------------|--------------------|------------------|-------------------|
| Analysis Name | 047-bo01.D         | Acquisition Date | 10/23/13 10:18:07 |
| Method        | Copy of DSOPMS2P.M | Operator         | Administrator     |
| Sample Name   | yjm-CFS-34A        | Instrument       | esquire3000plus   |
| Comment       |                    |                  |                   |

Acquisition Parameter

|                   |            |              |           |                          |          |
|-------------------|------------|--------------|-----------|--------------------------|----------|
| Ion Source Type   | ESI        | Ion Polarity | Positive  | Alternating Ion Polarity | off      |
| Mass Range Mode   | Std/Normal | Scan Begin   | 100 m/z   | Scan End                 | 1750 m/z |
| Capillary Exit    | 158.5 Volt | Skim 1       | 40.0 Volt | Trap Drive               | 85.2     |
| Accumulation Time | 15000 釐    | Averages     | 3 Spectra | Auto MS/MS               | on       |

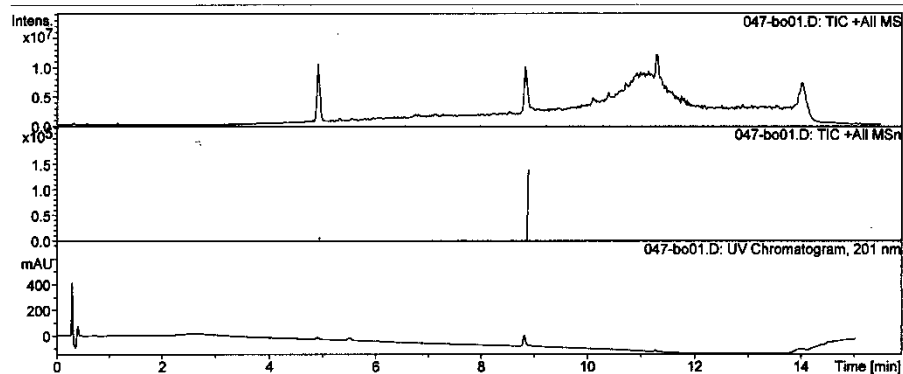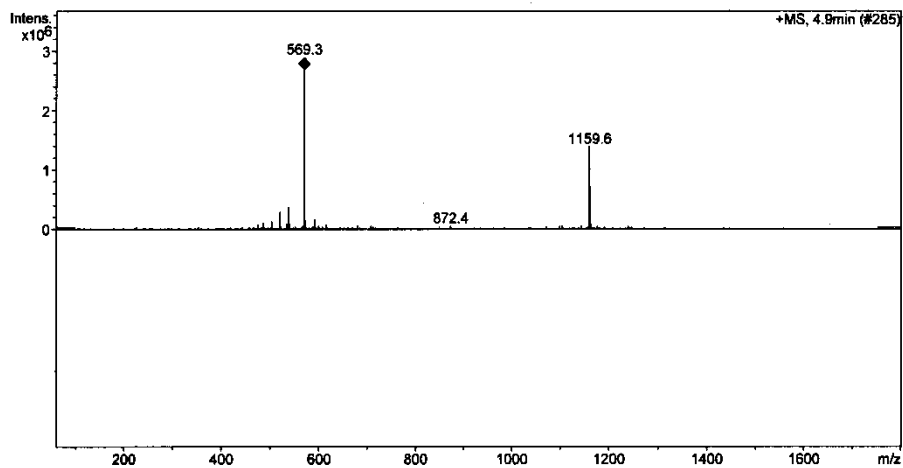



Figure S52. (-)-ESIMS spectrum of fortunilide F (6)

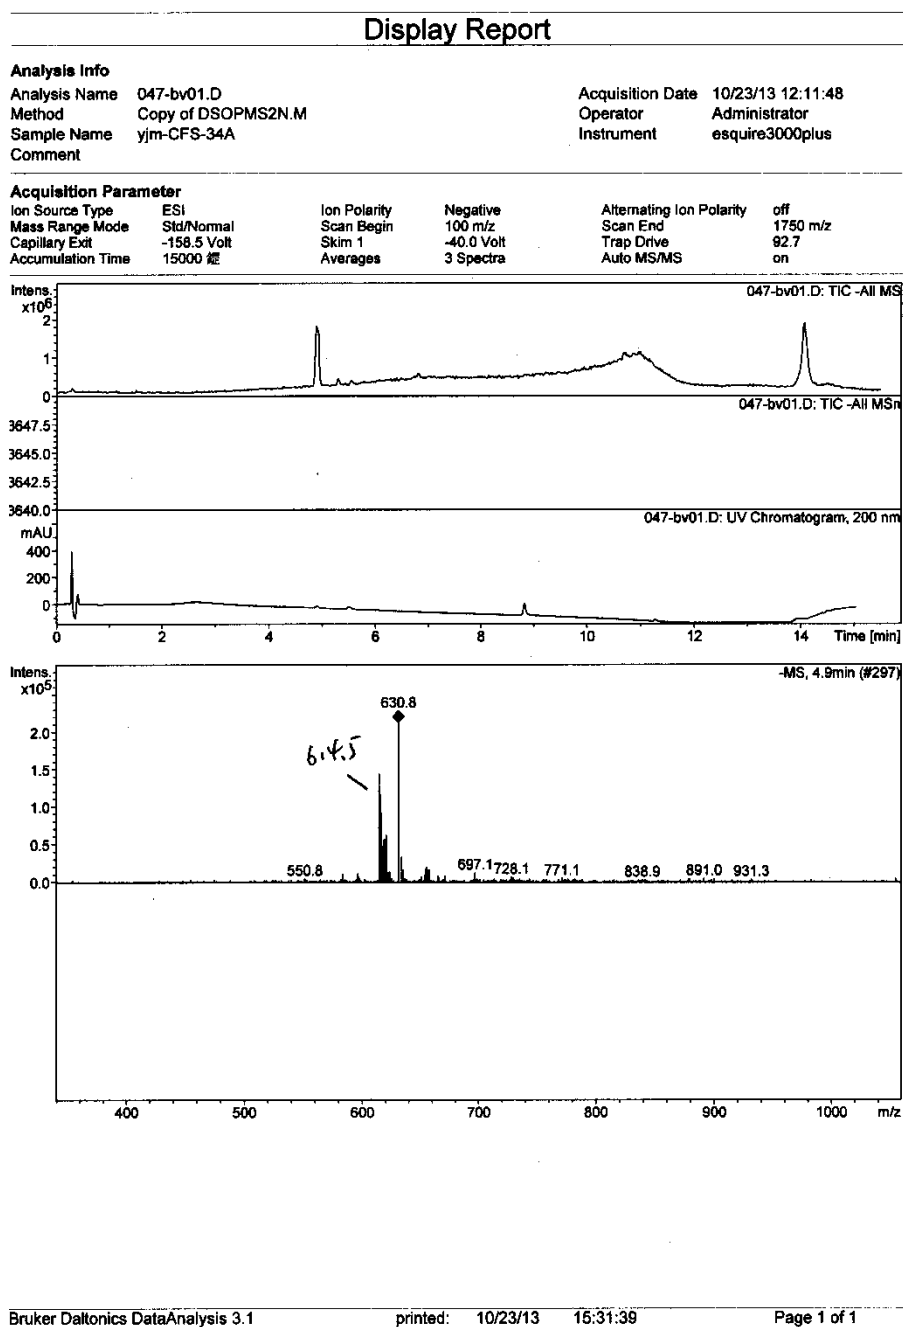

Figure S53. (+)-HRESIMS spectrum of fortunilide F (6)

Elemental Composition Report

Page 1

Single Mass Analysis

Tolerance = 3.0 PPM / DBE: min = -1.5, max = 50.0

Element prediction: Off

Number of isotope peaks used for i-FIT = 3

Monoisotopic Mass, Even Electron Ions

239 formula(e) evaluated with 1 results within limits (up to 50 closest results for each mass)

Elements Used:

C: 5-80 H: 2-120 O: 0-20 Na: 0-1

CFS-34A

LCT PXE KE324

31-Oct-2013

14:40:52

CFS-34A\_1031 37 (0.776) AM2 (Ar,10500.0,0.00,0.70); ABS; Cm (30:51)

1: TOF MS ES+

2.01e+004

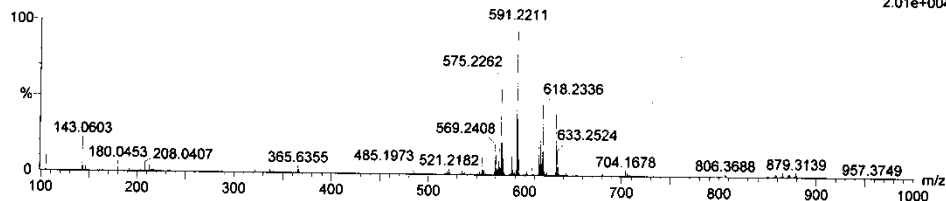

Minimum:

Maximum: 5.0 3.0 -1.5

Maximum: 5.0 3.0 50.0

| Mass     | Calc. Mass | mDa | PPM | DBE  | i-FIT | i-FIT (Norm) | Formula        |
|----------|------------|-----|-----|------|-------|--------------|----------------|
| 591.2211 | 591.2206   | 0.5 | 0.8 | 13.5 | 108.9 | 0.0          | C31 H36 O10 Na |

Figure S54. IR spectrum of fortunilide F (6)

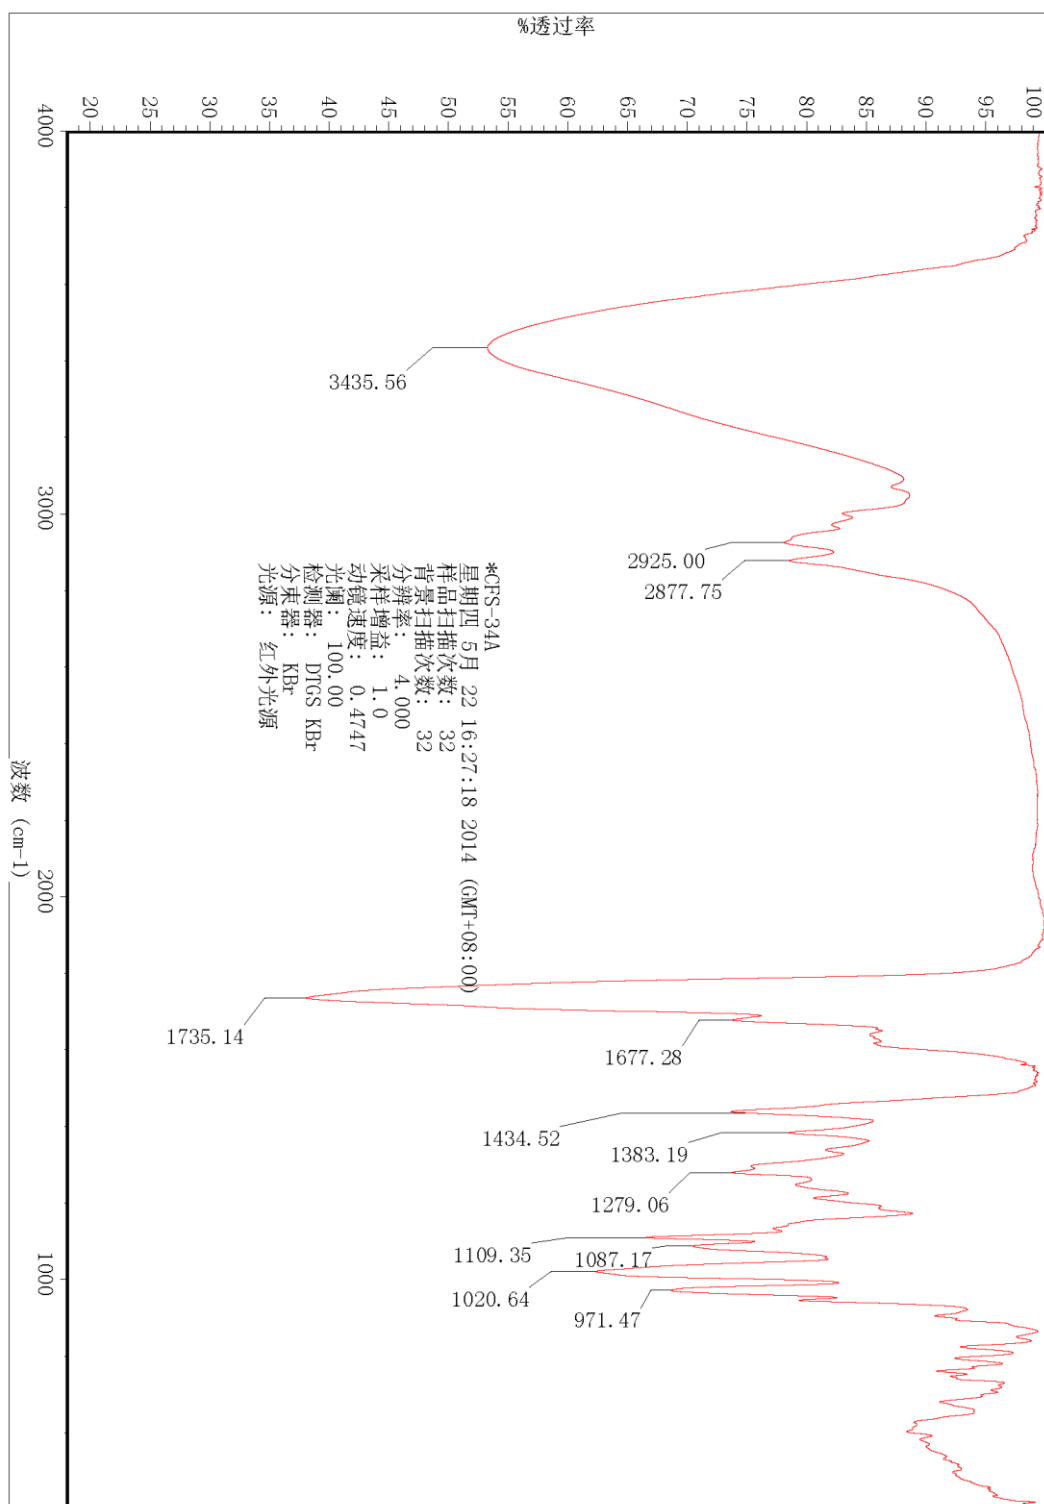

Figure S55. <sup>1</sup>H NMR spectrum of fortunilide G (7) in CDCl<sub>3</sub>

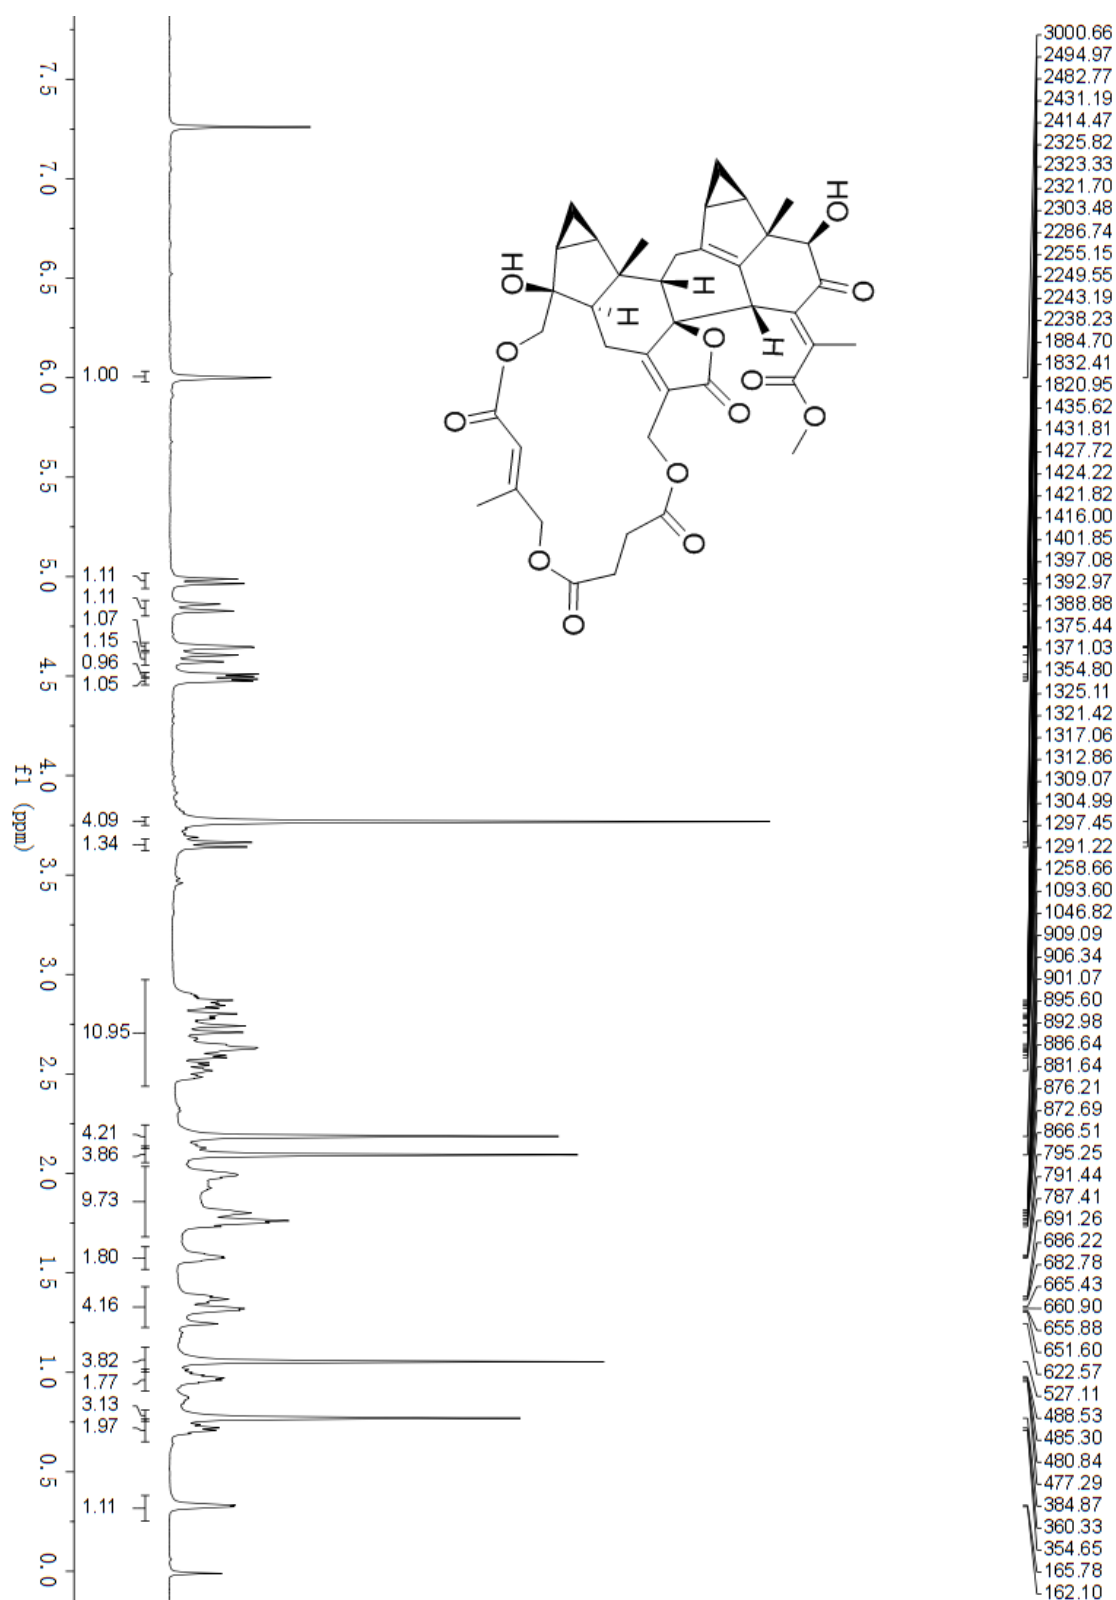

Figure S56.  $^{13}\text{C}$  NMR spectrum of fortunilide G (7) in  $\text{CDCl}_3$

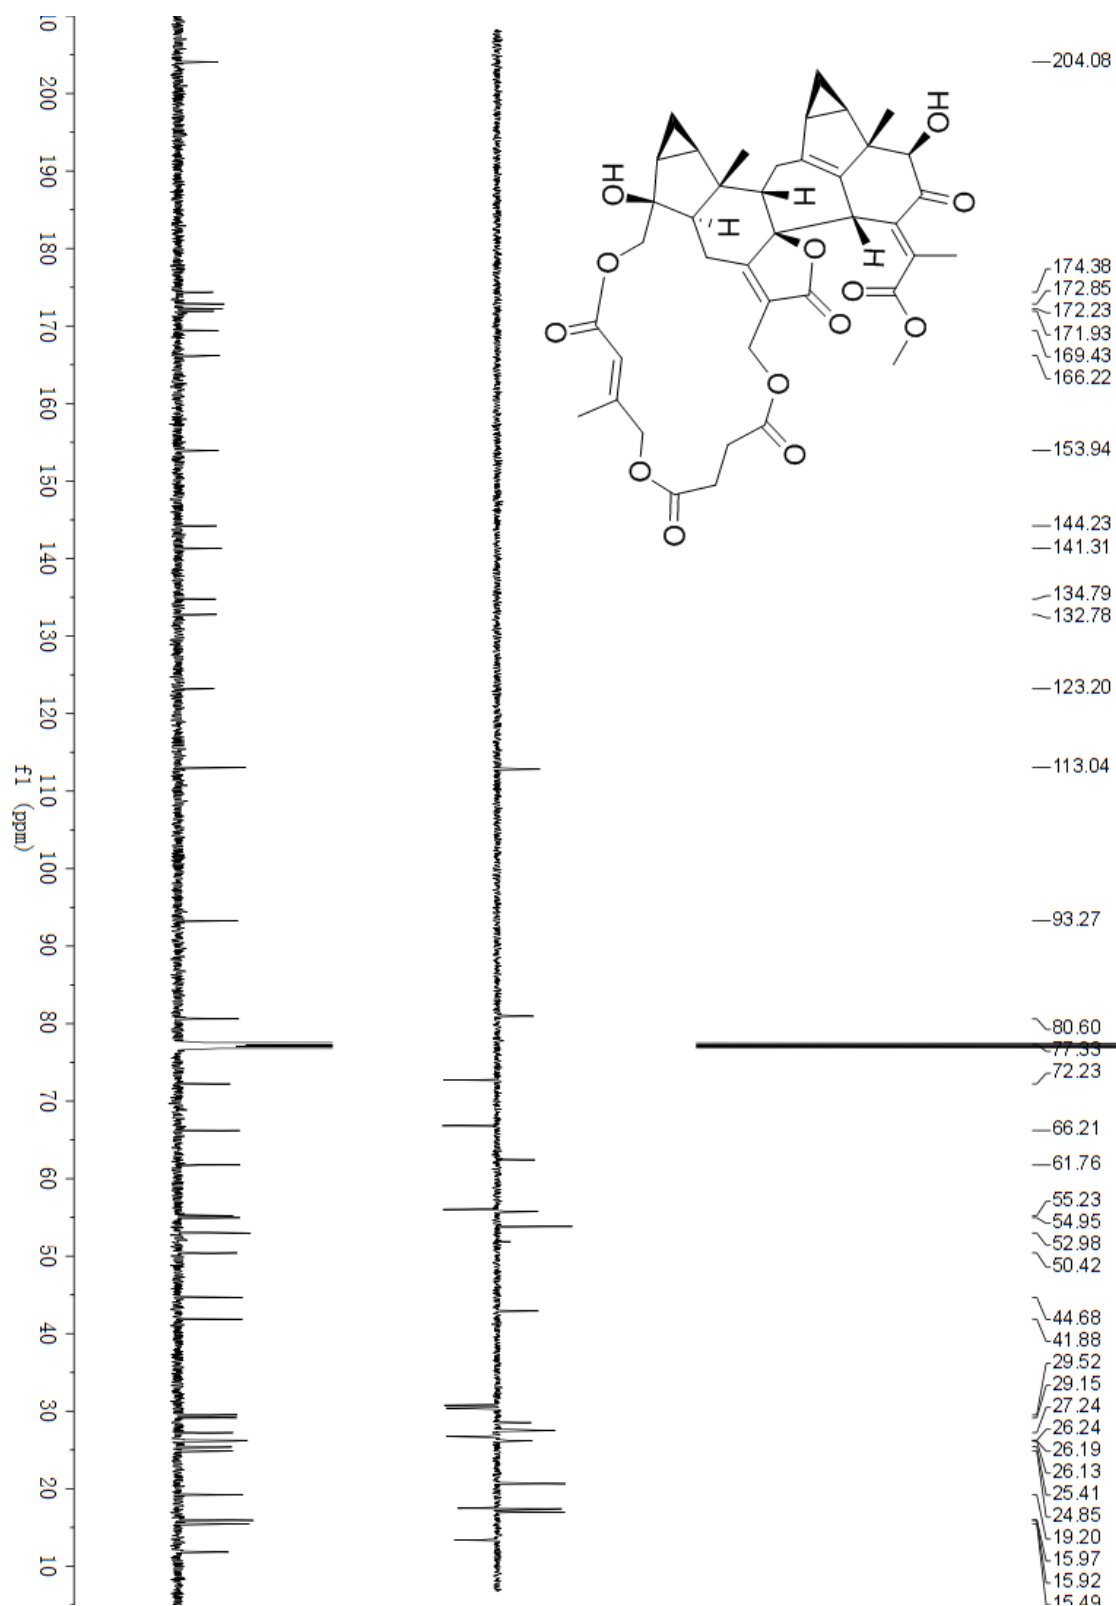

Figure S57. HSQC spectrum of fortunilide G (7) in CDCl<sub>3</sub>

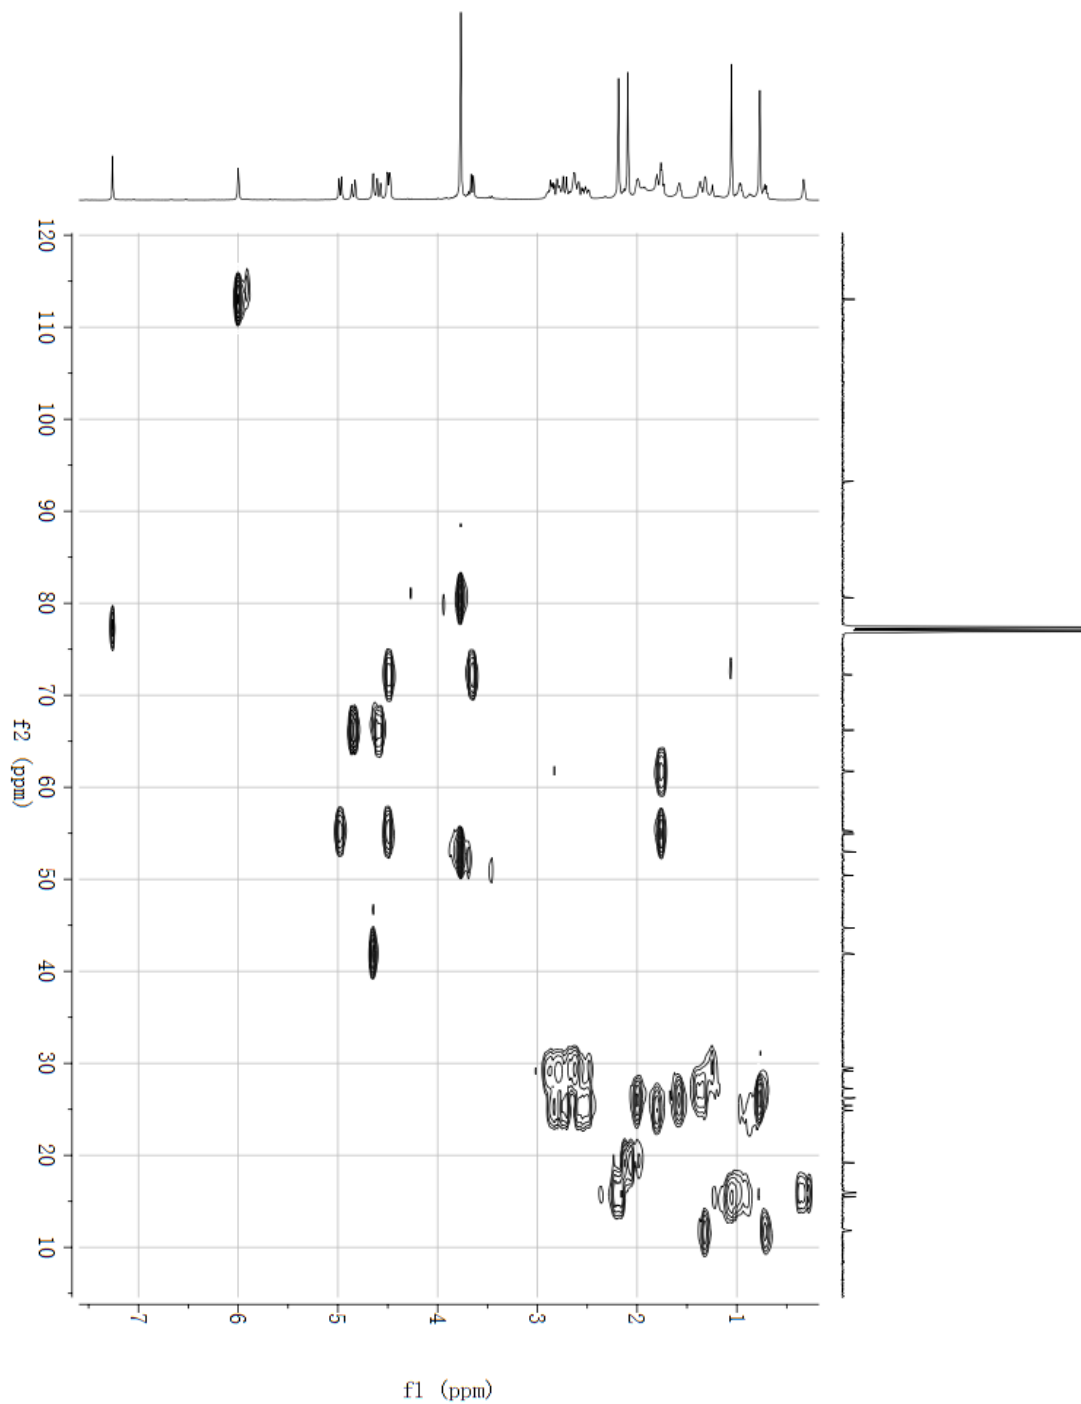

Figure S58. HMBC spectrum of fortunilide G (7) in CDCl<sub>3</sub>

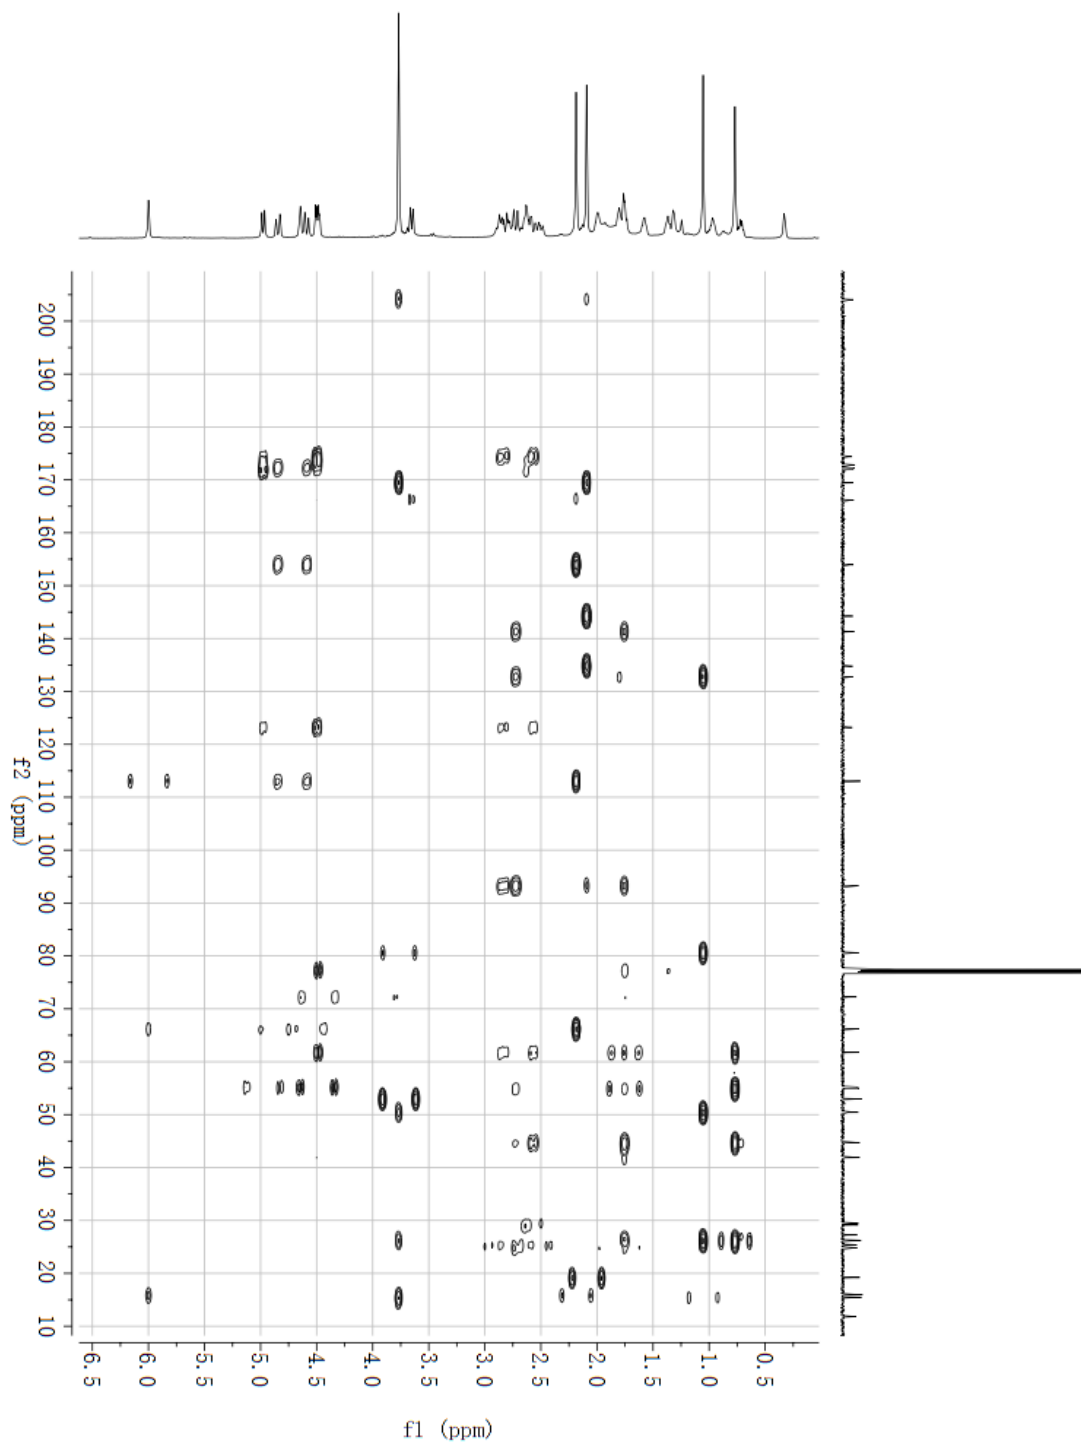

Figure S59. ROESY spectrum of fortunilide G (7)

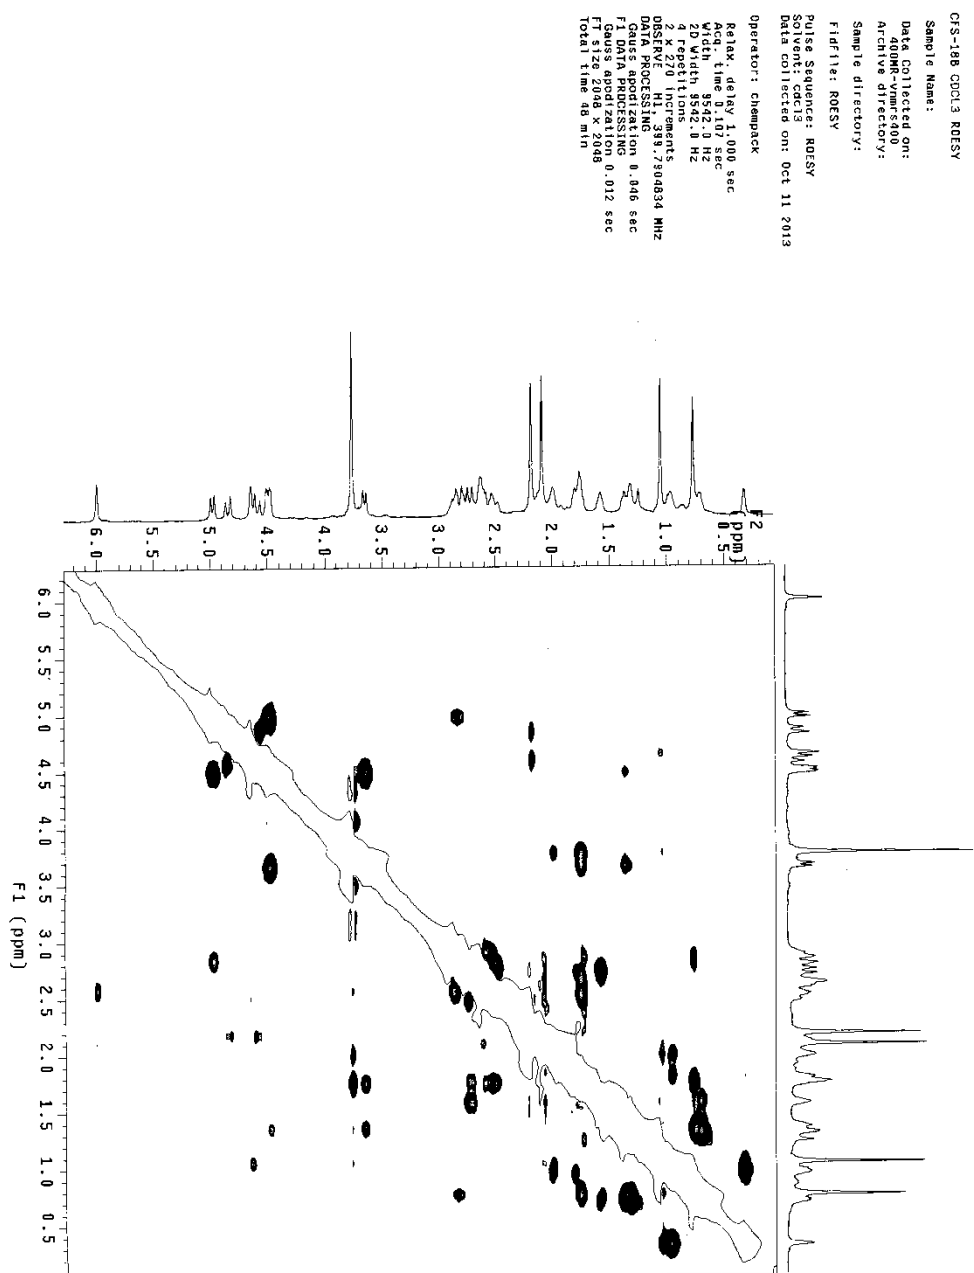



Figure S60. (+)-ESIMS spectrum of fortunilide G (7)

Display Report

**Analysis Info**  
 Analysis Name 048-7201.D Acquisition Date 09/10/13 04:53:54  
 Method Copy of DSOPMS2P.M Operator Administrator  
 Sample Name yjm-CFS-17B Instrument esquire3000plus  
 Comment

**Acquisition Parameter**  
 Ion Source Type ESI Ion Polarity Positive Alternating Ion Polarity off  
 Mass Range Mode Std/Normal Scan Begin 100 m/z Scan End 1750 m/z  
 Capillary Exit 158.5 Volt Skim 1 40.0 Volt Trap Drive 85.2  
 Accumulation Time 15000 纒 Averages 3 Spectra Auto MS/MS on

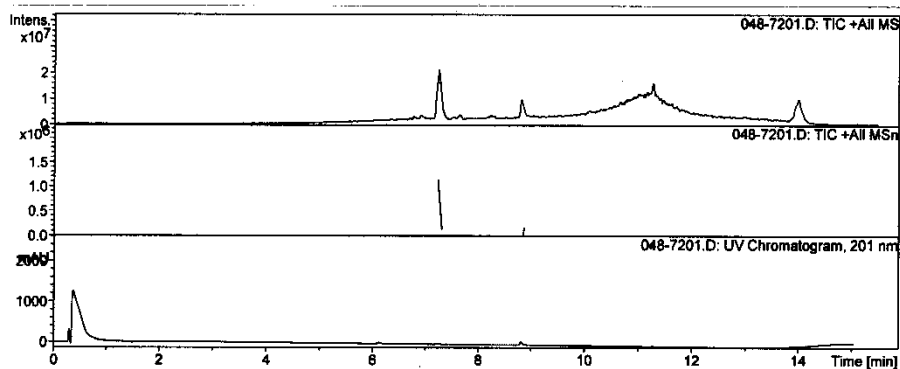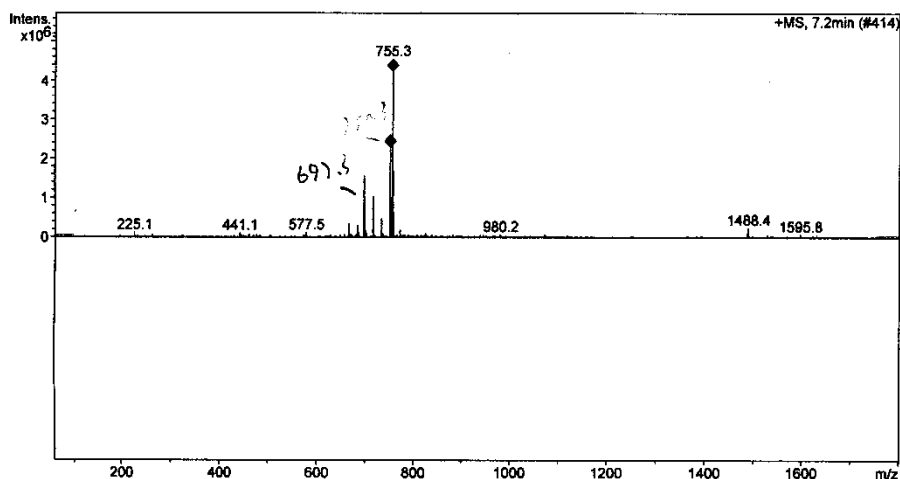

Figure S61. (-)-ESIMS spectrum of fortunilide G (7)

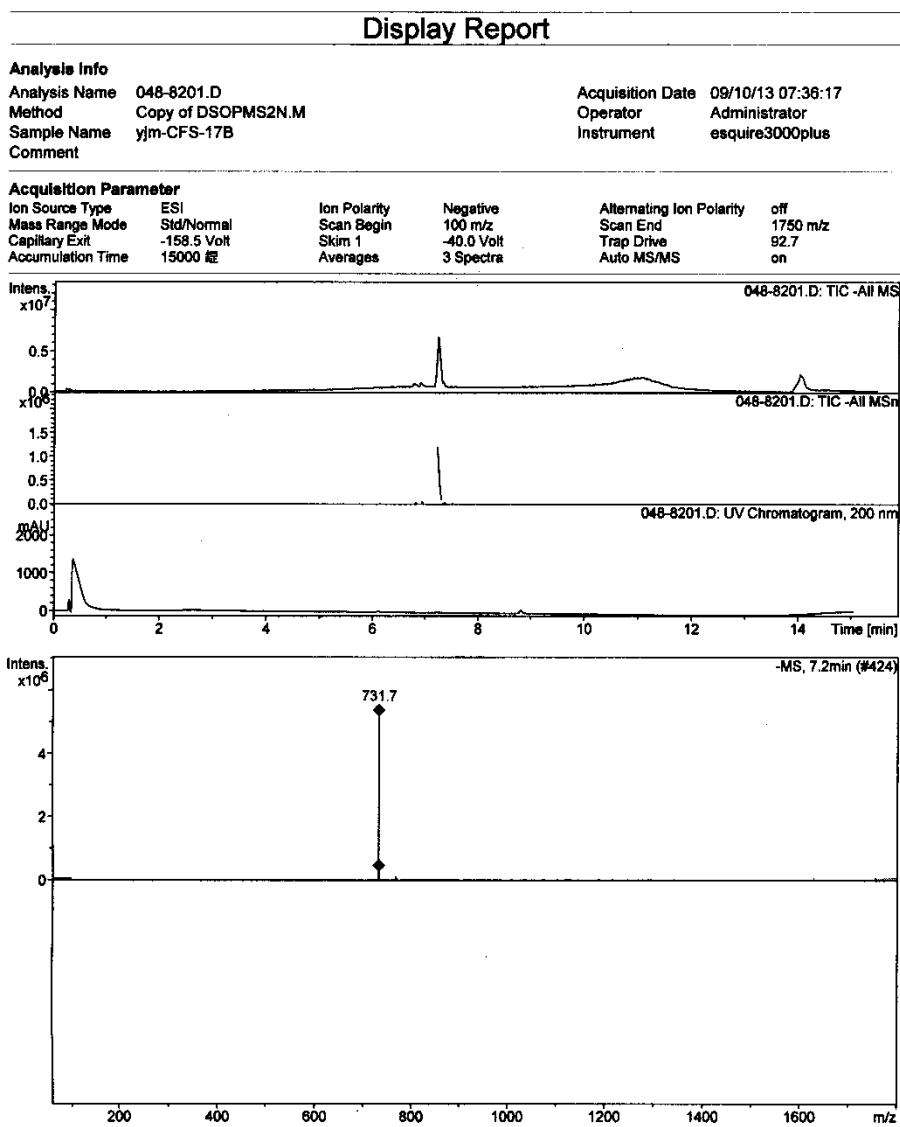

Figure S62. (+)-HRESIMS spectrum of fortunilide G (7)

Elemental Composition Report

Page 1

Single Mass Analysis

Tolerance = 3.0 PPM / DBE: min = -1.5, max = 50.0

Element prediction: Off

Number of isotope peaks used for i-FIT = 3

Monoisotopic Mass, Even Electron Ions

321 formula(e) evaluated with 2 results within limits (up to 50 closest results for each mass)

Elements Used:

C: 5-80 H: 2-120 O: 0-20 Na: 0-1

CFS-17B

LCT PXE KE324

13-Sep-2013

14:07:16

1: TOF MS ES+

2.84e+004

CFS-17B\_0913 42 (0.902) AM2 (Ar,10000.0,0.00,1.00); ABS: Cm (26:44)

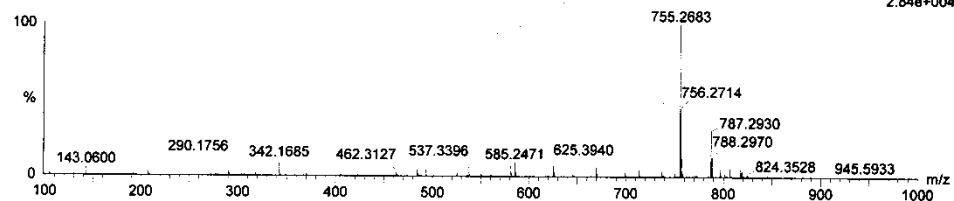

Minimum:

Maximum:

| Mass     | Calc. Mass | mDa  | PPM  | DBE  | i-FIT | i-FIT (Norm) | Formula        |
|----------|------------|------|------|------|-------|--------------|----------------|
| 755.2683 | 755.2680   | 0.3  | 0.4  | 18.5 | 80.6  | 0.0          | C40 H44 O13 Na |
|          | 755.2704   | -2.1 | -2.8 | 21.5 | 86.9  | 6.3          | C42 H43 O13    |

Figure S63. IR spectrum of fortunilide G (7)

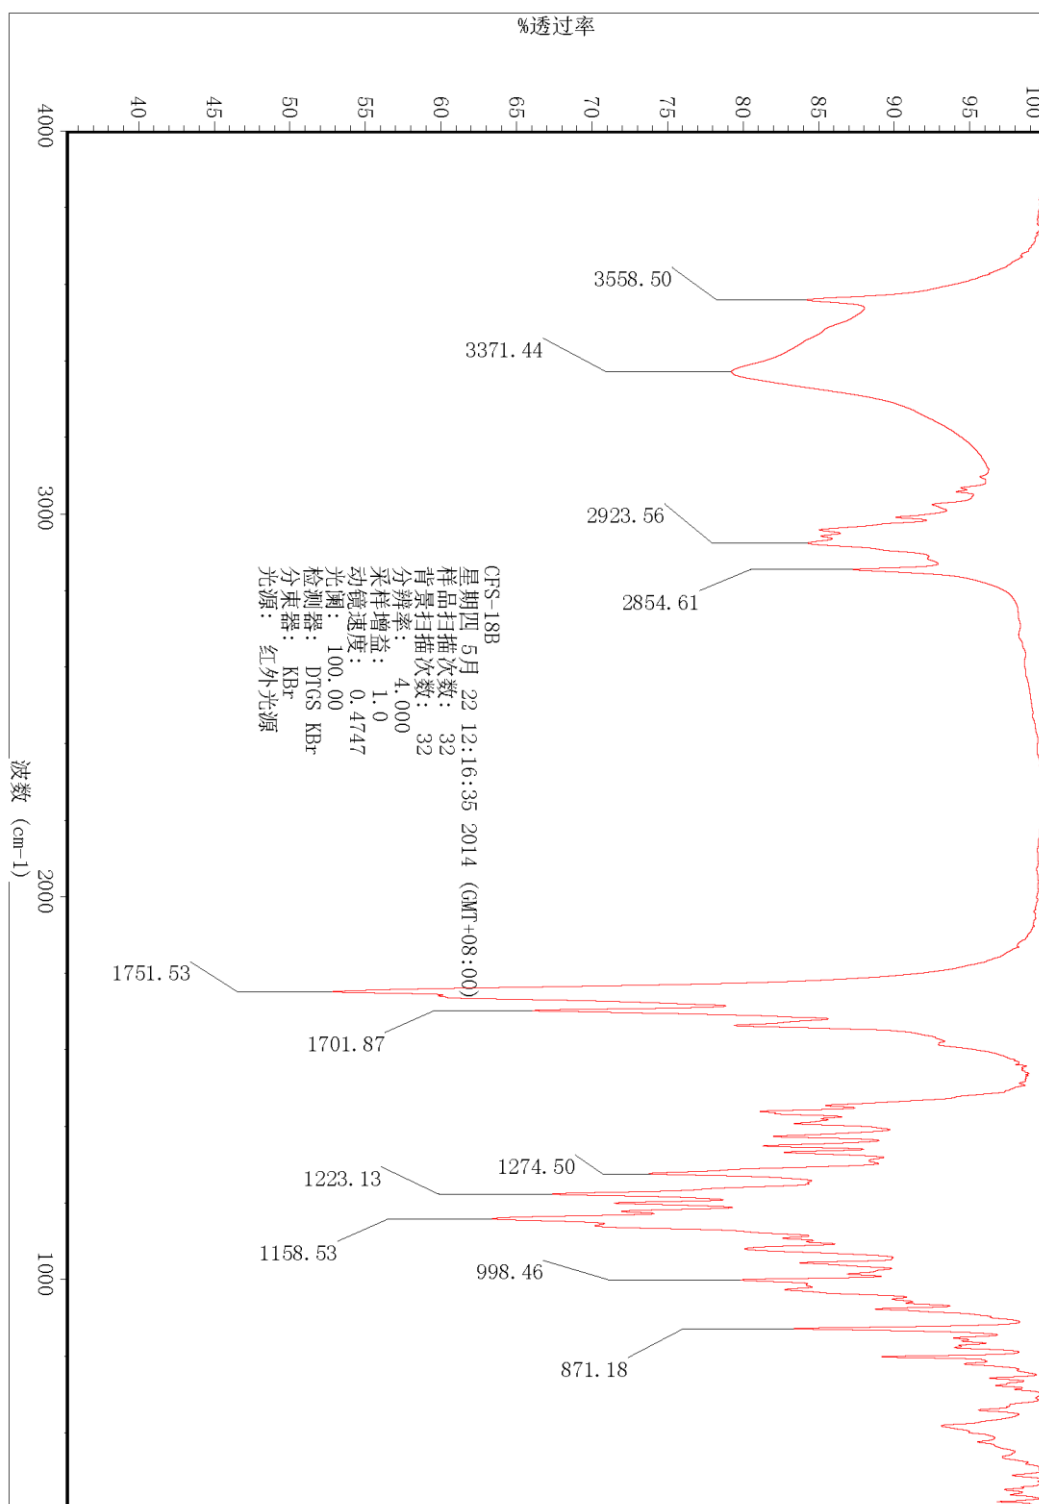

Figure S64.  $^1\text{H}$  NMR spectrum of fortunilide H (8) in  $\text{CDCl}_3$

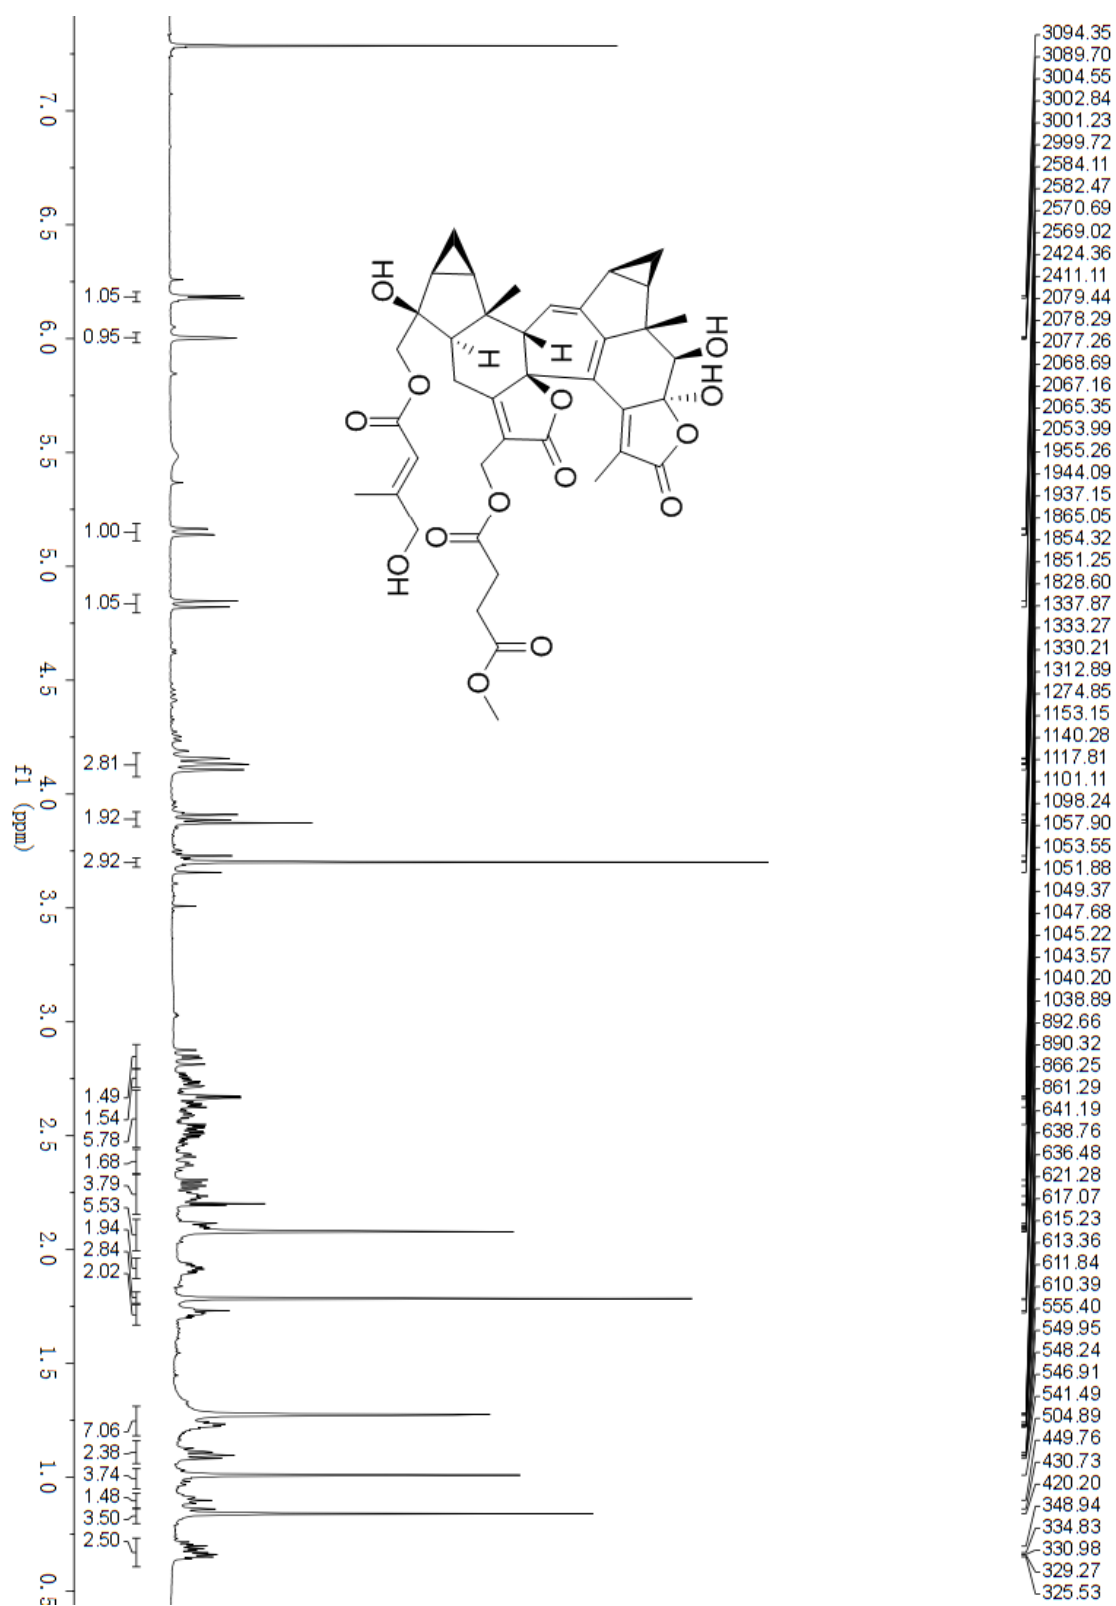

Figure S65.  $^{13}\text{C}$  NMR spectrum of fortunilide H (8) in  $\text{CDCl}_3$

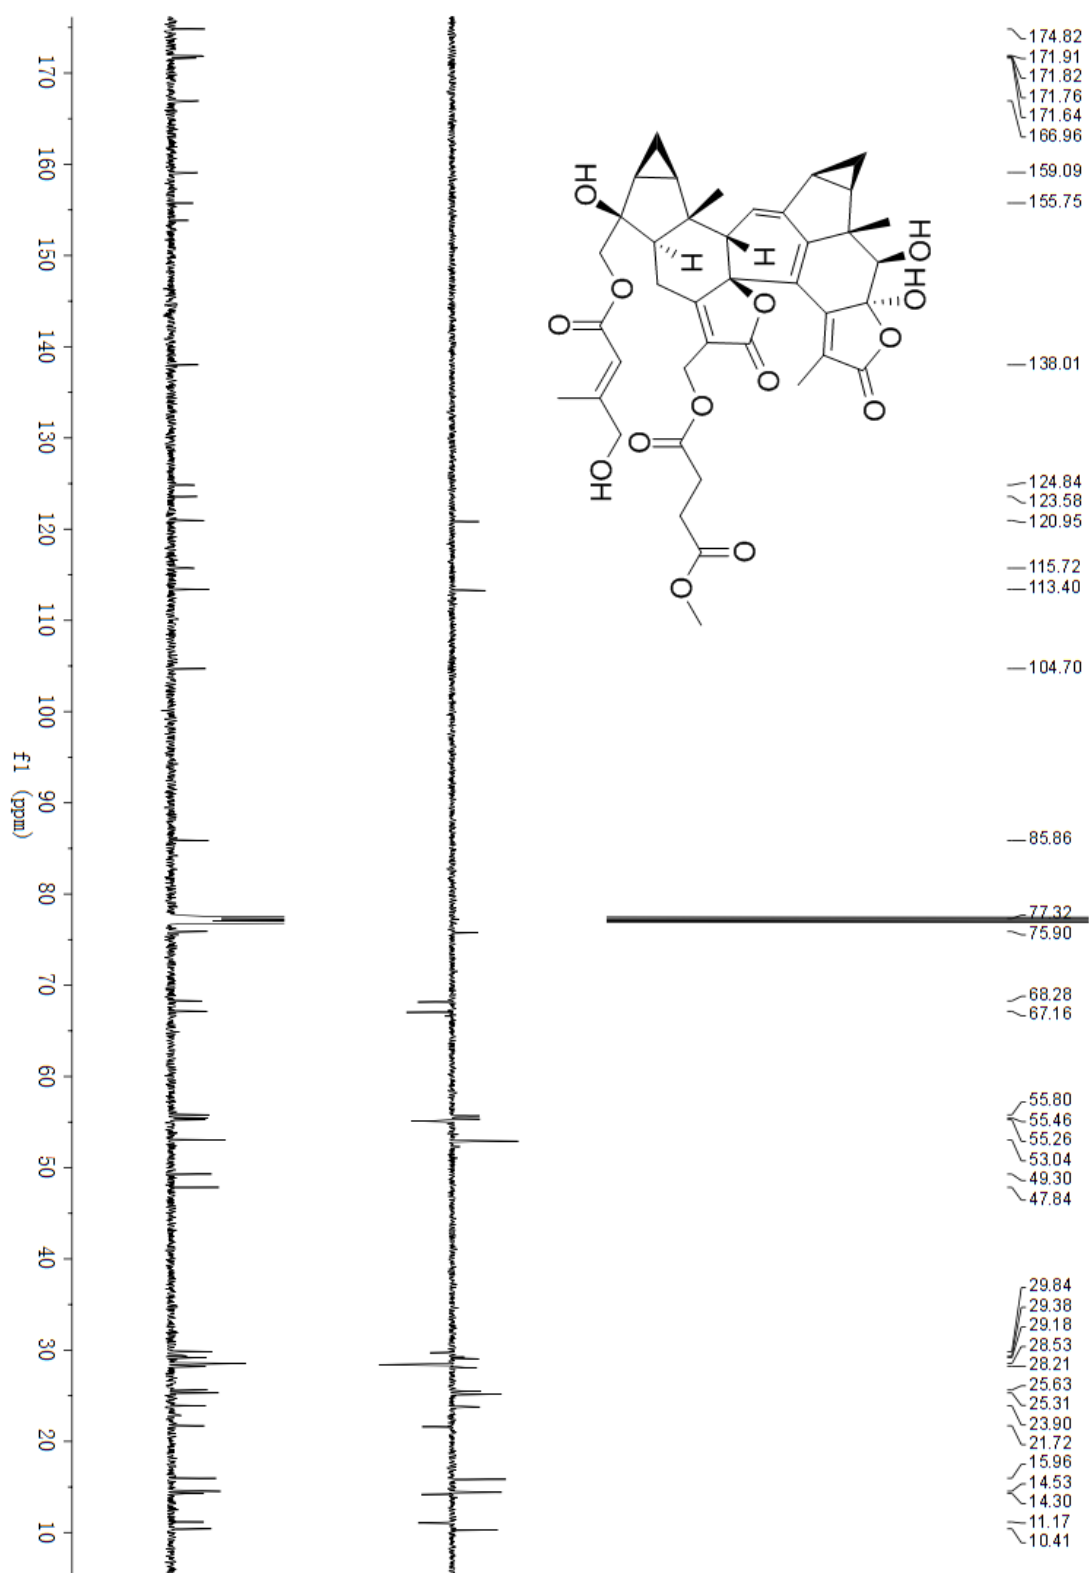

Figure S66. HSQC spectrum of fortunilide H (8) in CDCl<sub>3</sub>

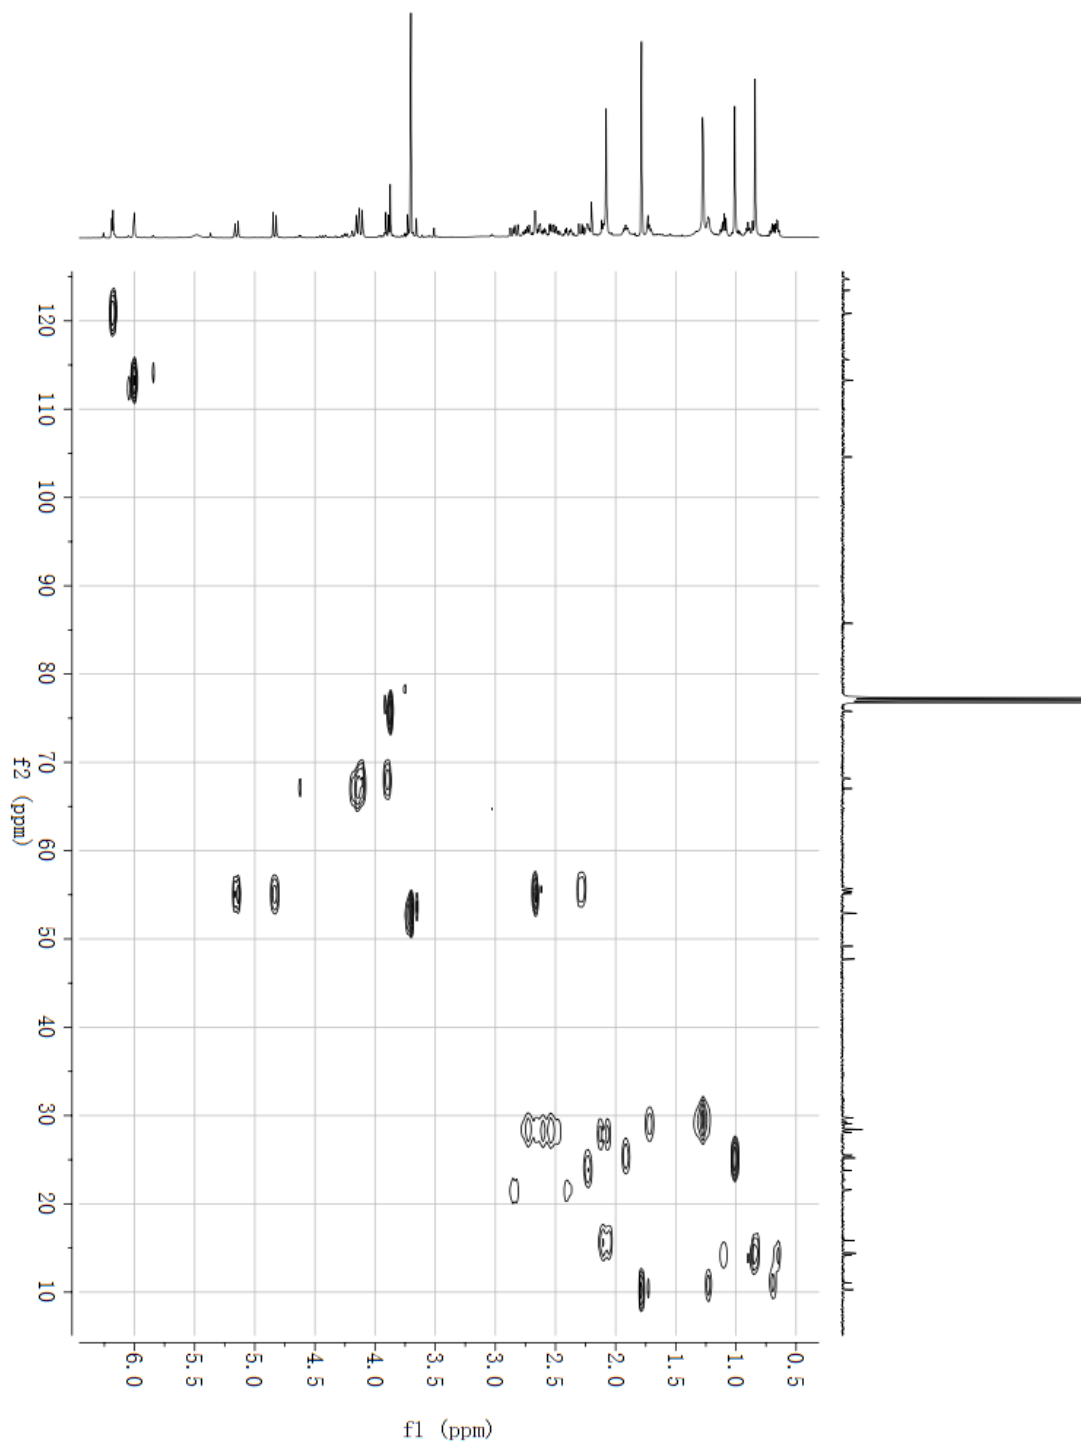

Figure S67. HMBC spectrum of fortunilide H (8) in CDCl<sub>3</sub>

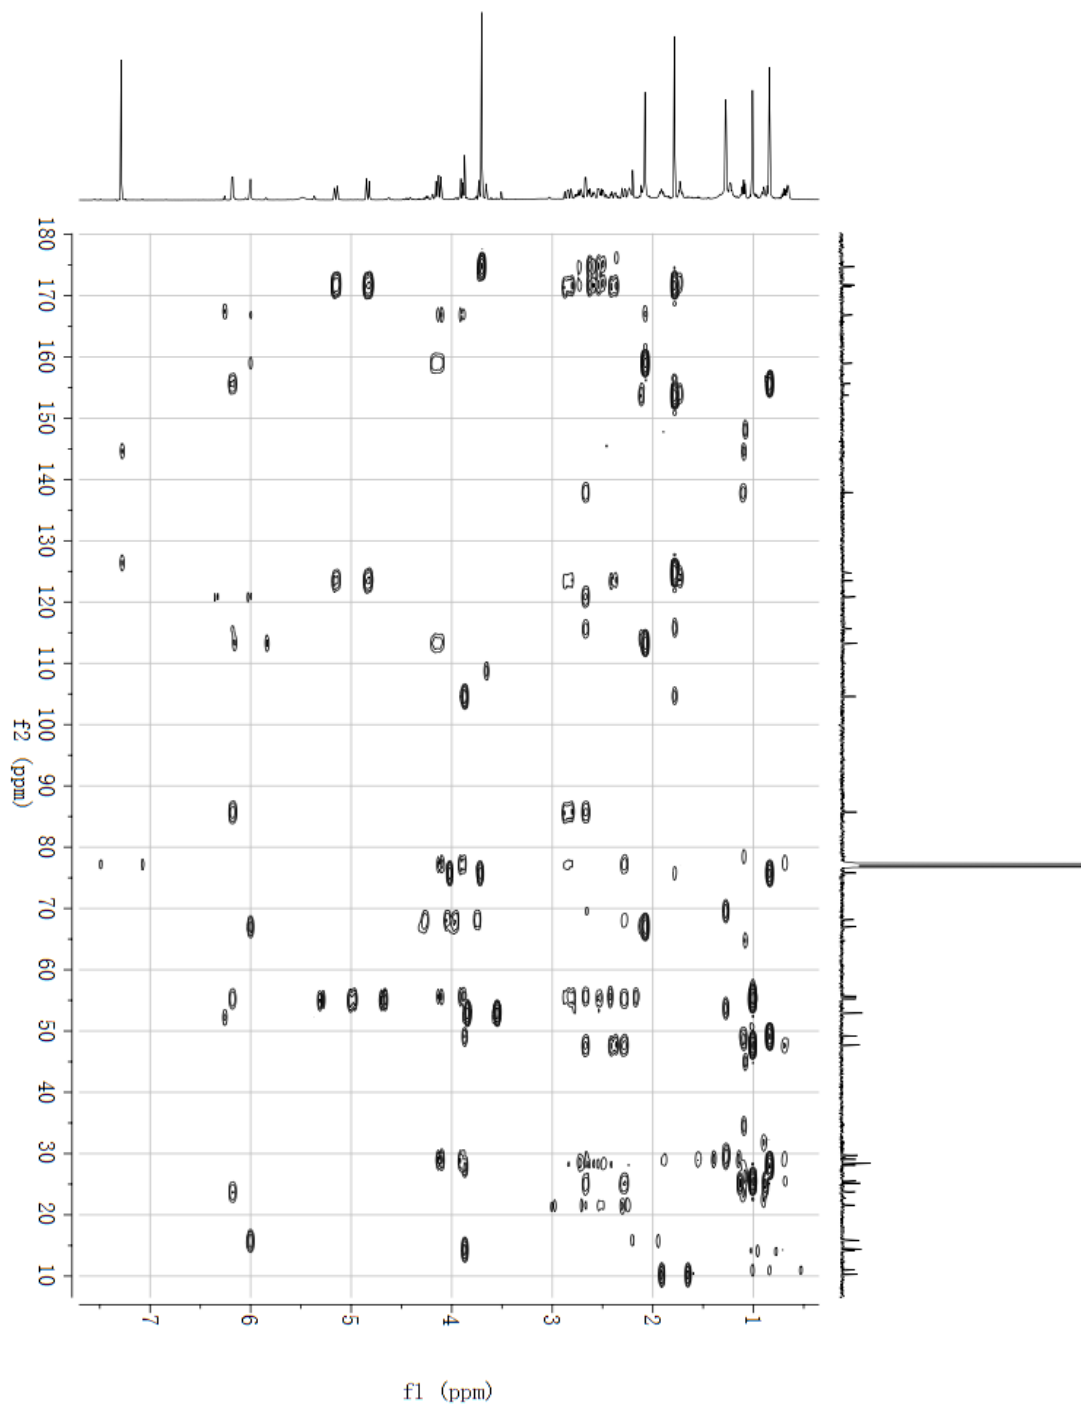



Figure S68. ROESY spectrum of fortunilide H (8)

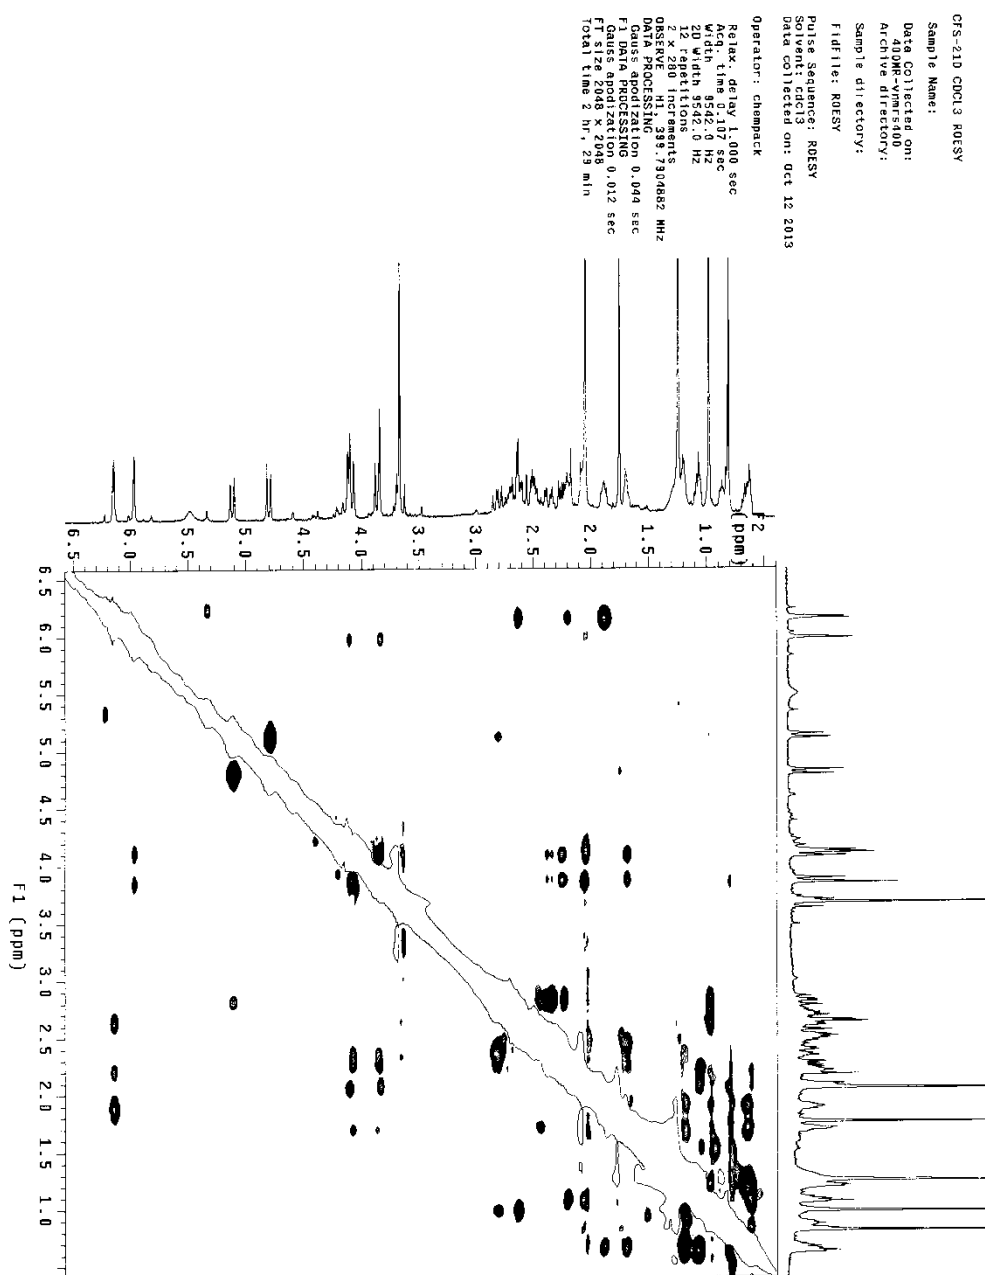

Figure S69. (+)-ESIMS spectrum of fortunilide H (8)

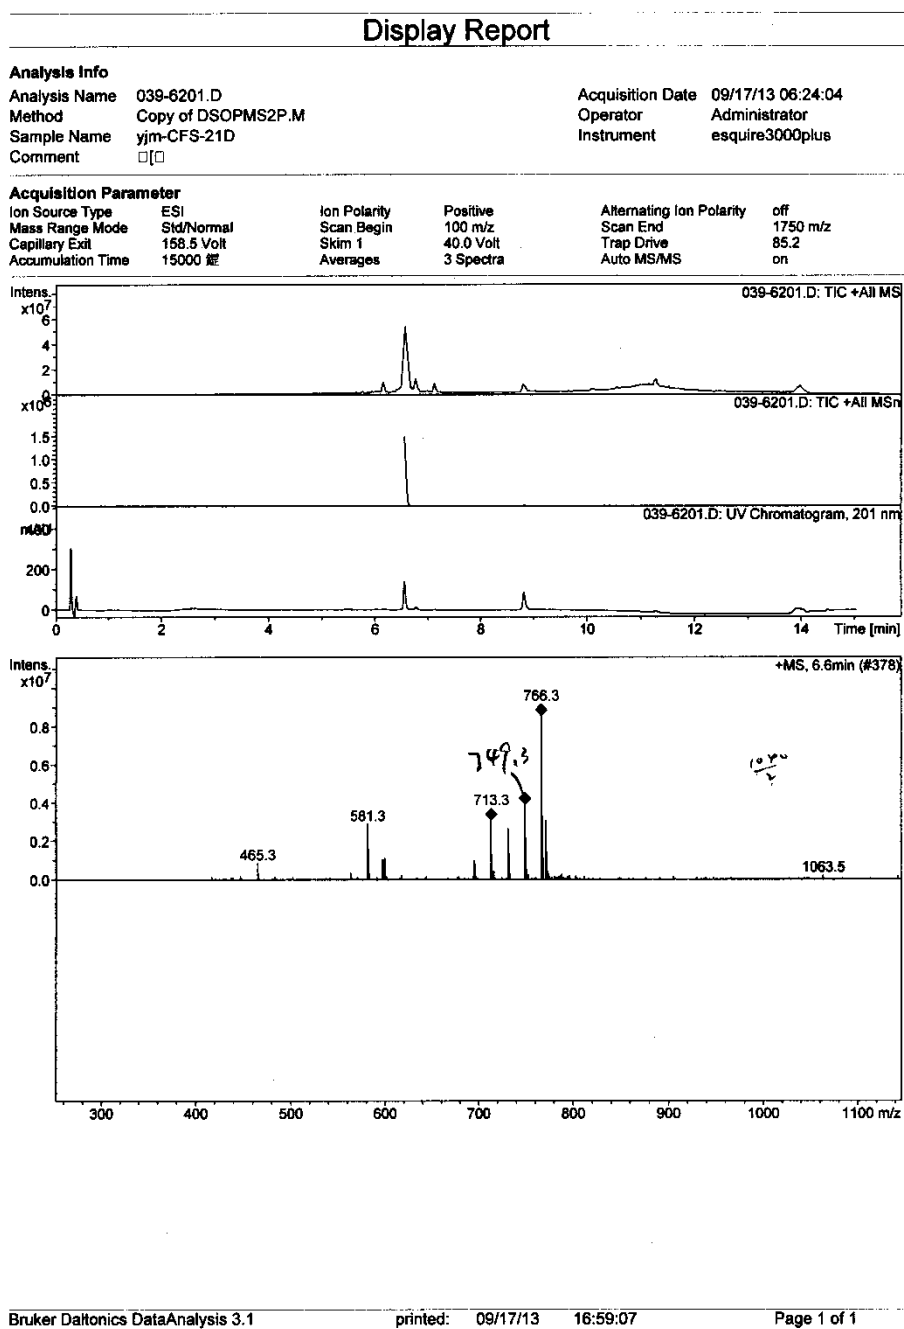

Figure S70. (-)-ESIMS spectrum of fortunilide H (8)

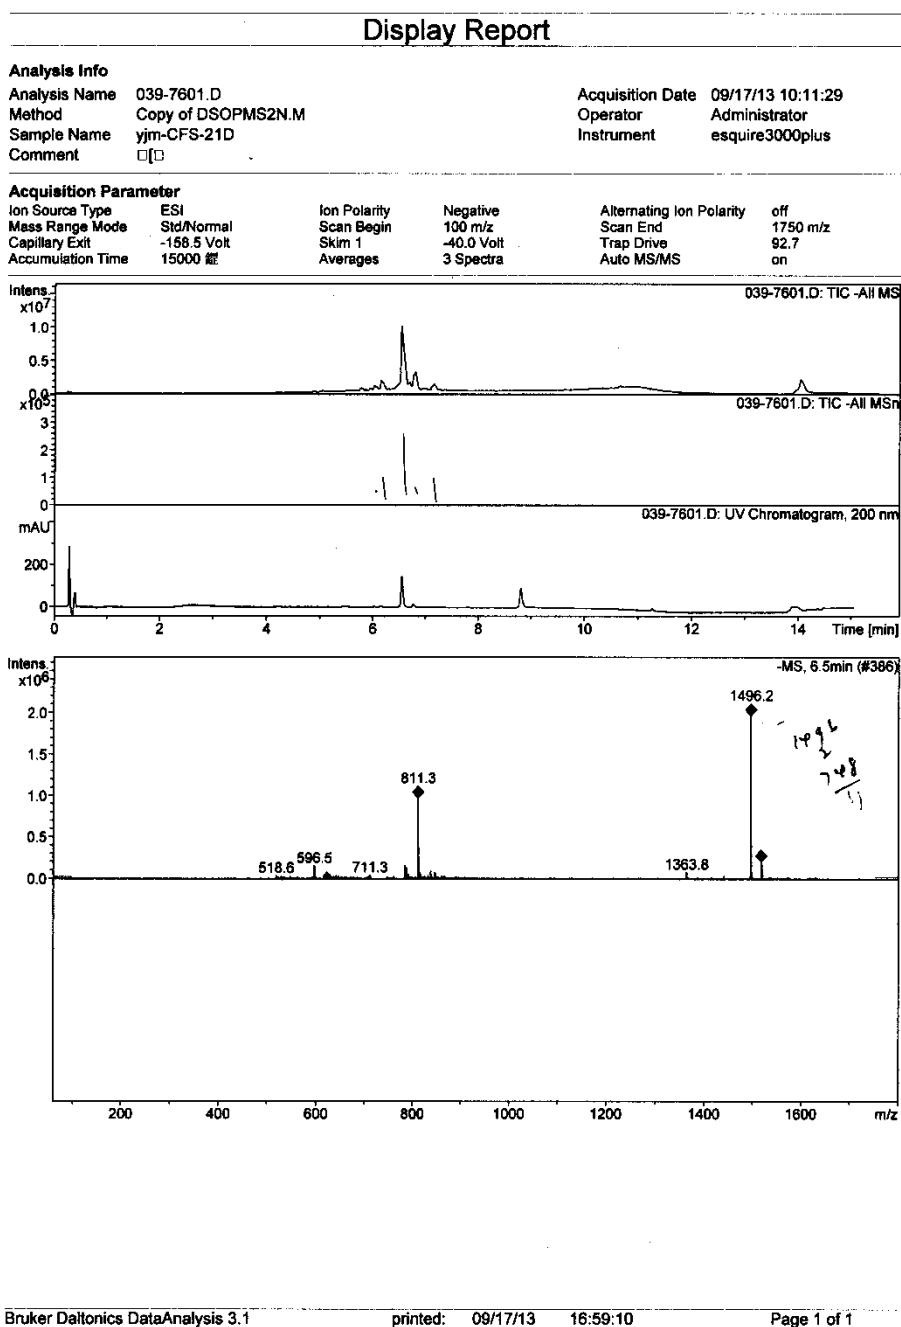

Figure S71. (+)-HRESIMS spectrum of fortunilide H (8)

Elemental Composition Report

Single Mass Analysis

Tolerance = 4.0 PPM / DBE: min = -1.5, max = 50.0  
 Element prediction: Off  
 Number of isotope peaks used for i-FIT = 3

Monoisotopic Mass, Even Electron Ions

329 formula(e) evaluated with 2 results within limits (up to 50 closest results for each mass)

Elements Used:

C: 5-80 H: 2-120 O: 0-20 Na: 0-1

CFS-21D

LCT PXE KE324

31-Oct-2013

14:45:51

1: TOF MS ES+

2.25e+004

CFS-21D\_103145 (0.989) AM2 (Ar,10500.0,0.00,0.70); ABS: Cm (27.46)

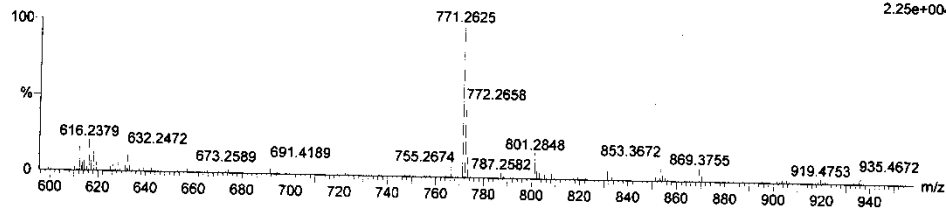

Minimum:

Maximum: 5.0 4.0 -1.5

Maximum: 771.2625 50.0

| Mass     | Calc. Mass | mDa  | PPM  | DBE  | i-FIT | i-FIT (Norm) | Formula        |
|----------|------------|------|------|------|-------|--------------|----------------|
| 771.2625 | 771.2629   | -0.4 | -0.5 | 18.5 | 76.1  | 0.0          | C40 H44 O14 Na |
|          | 771.2653   | -2.8 | -3.6 | 21.5 | 81.9  | 5.8          | C42 H43 O14    |

Figure S72. IR spectrum of fortunilide H (8)

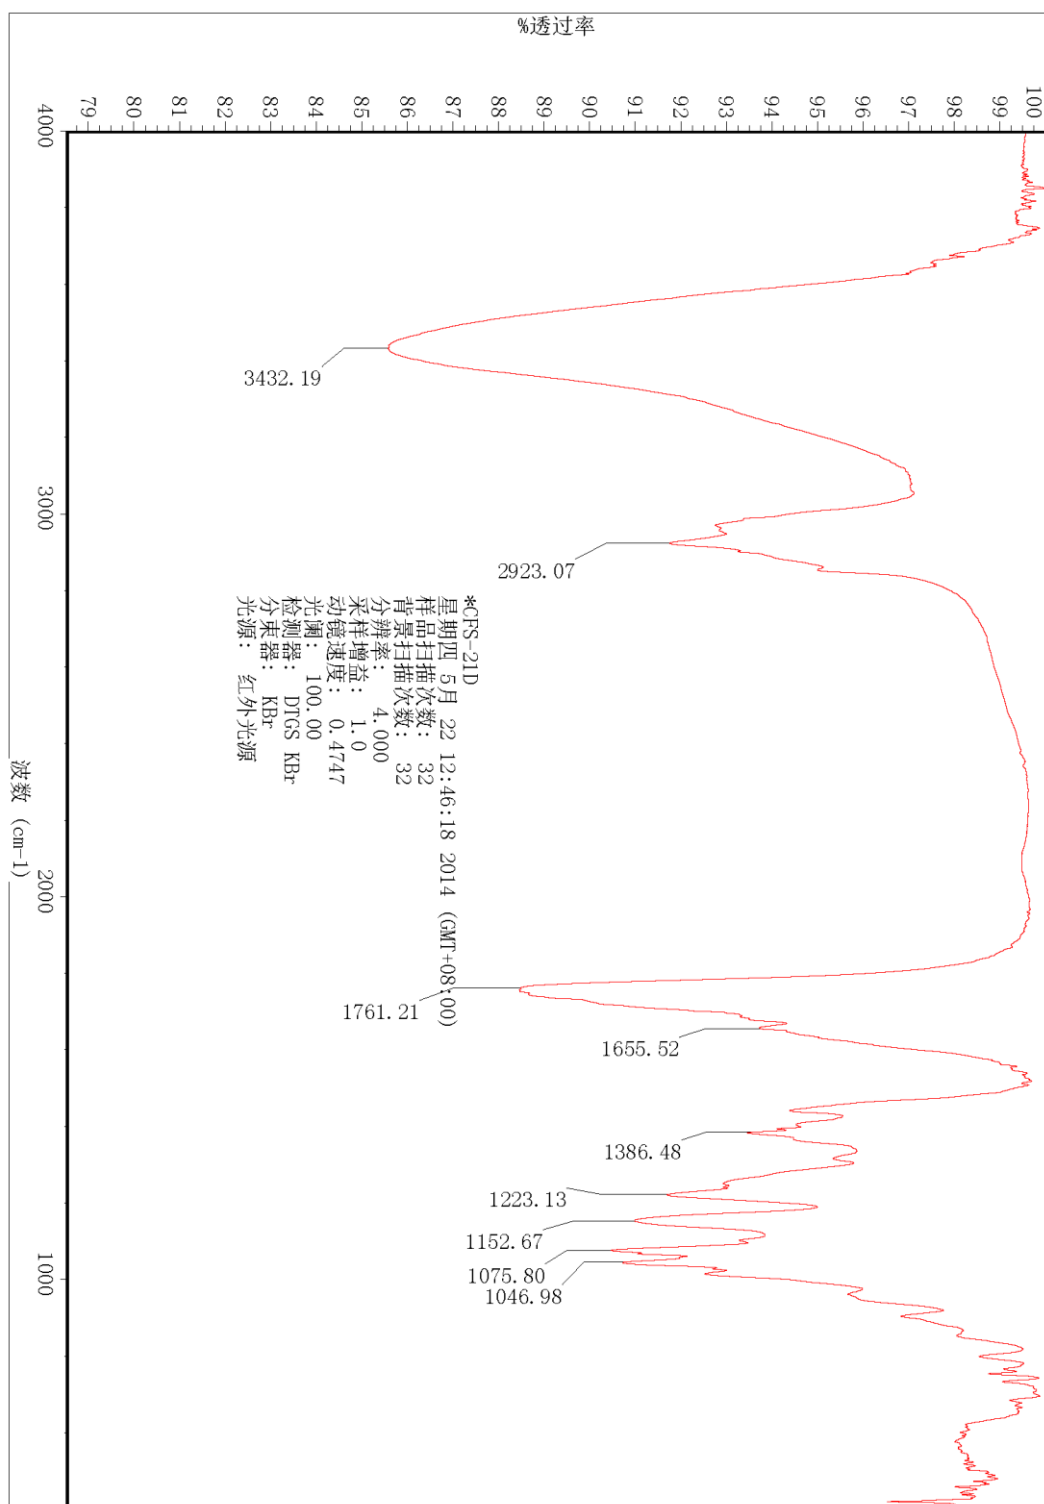

Figure S73. <sup>1</sup>H NMR spectrum of fortunilide I (9) in CD<sub>3</sub>OD

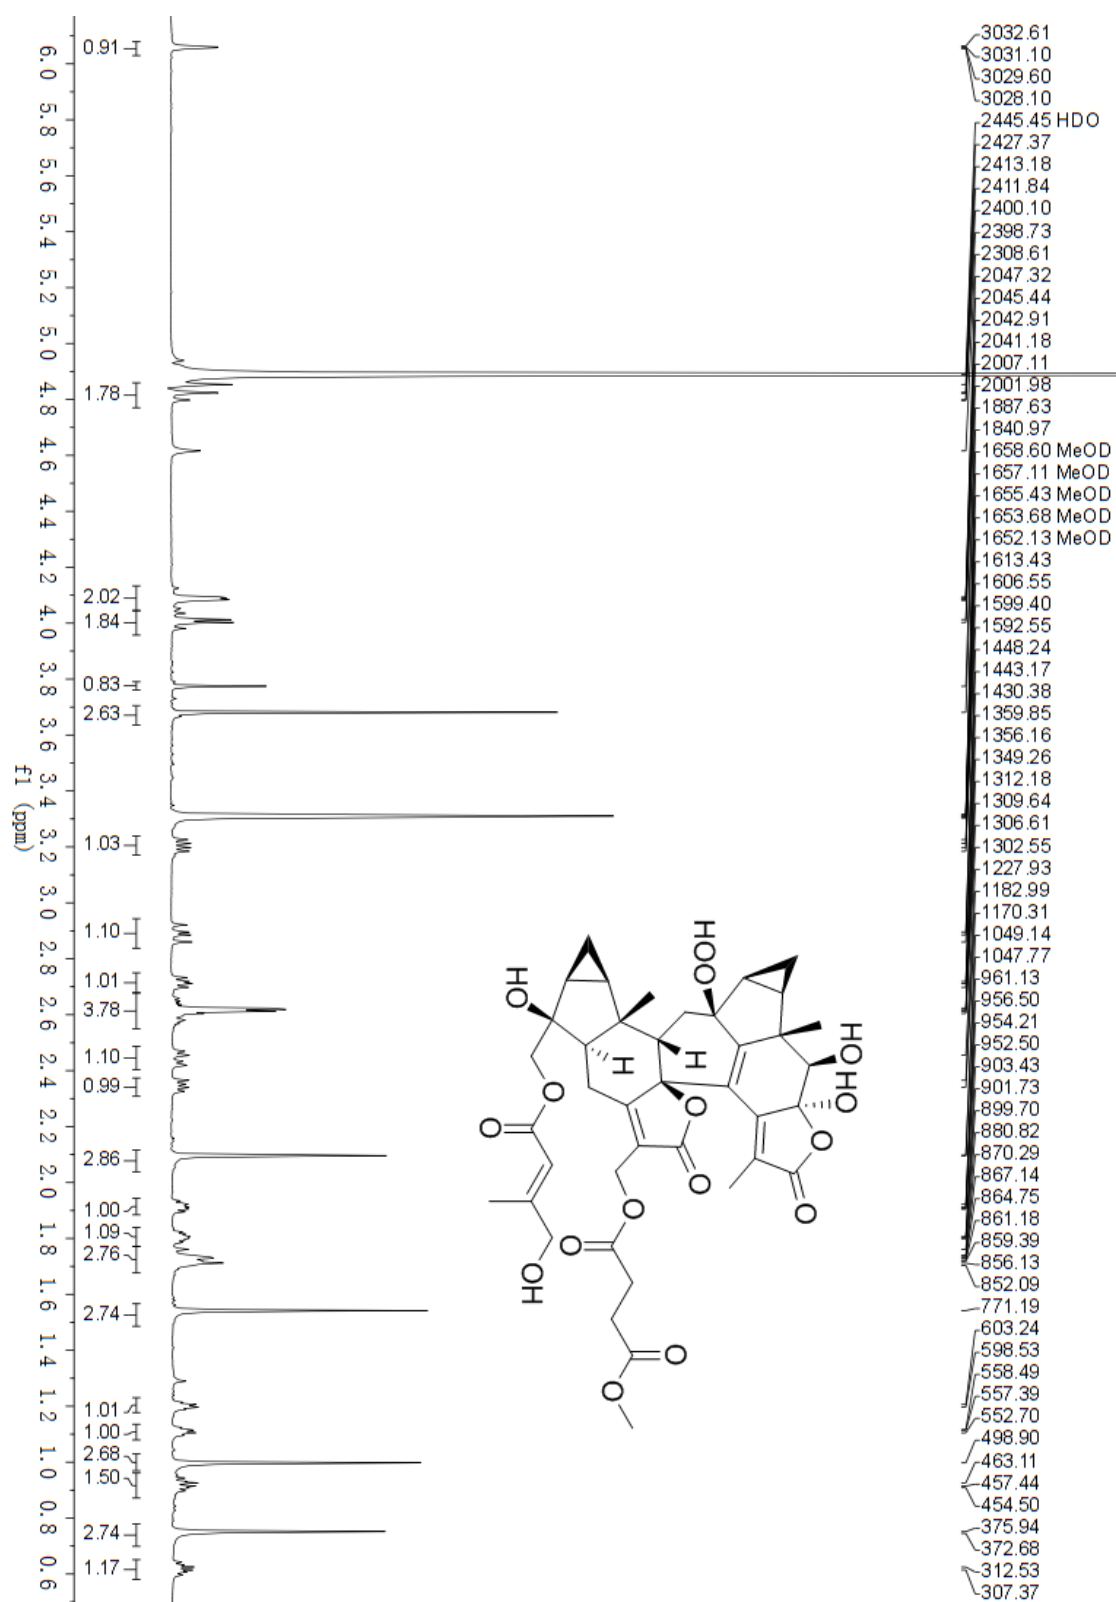

Figure S74.  $^{13}\text{C}$  NMR spectrum of fortunilide I (9) in  $\text{CD}_3\text{OD}$

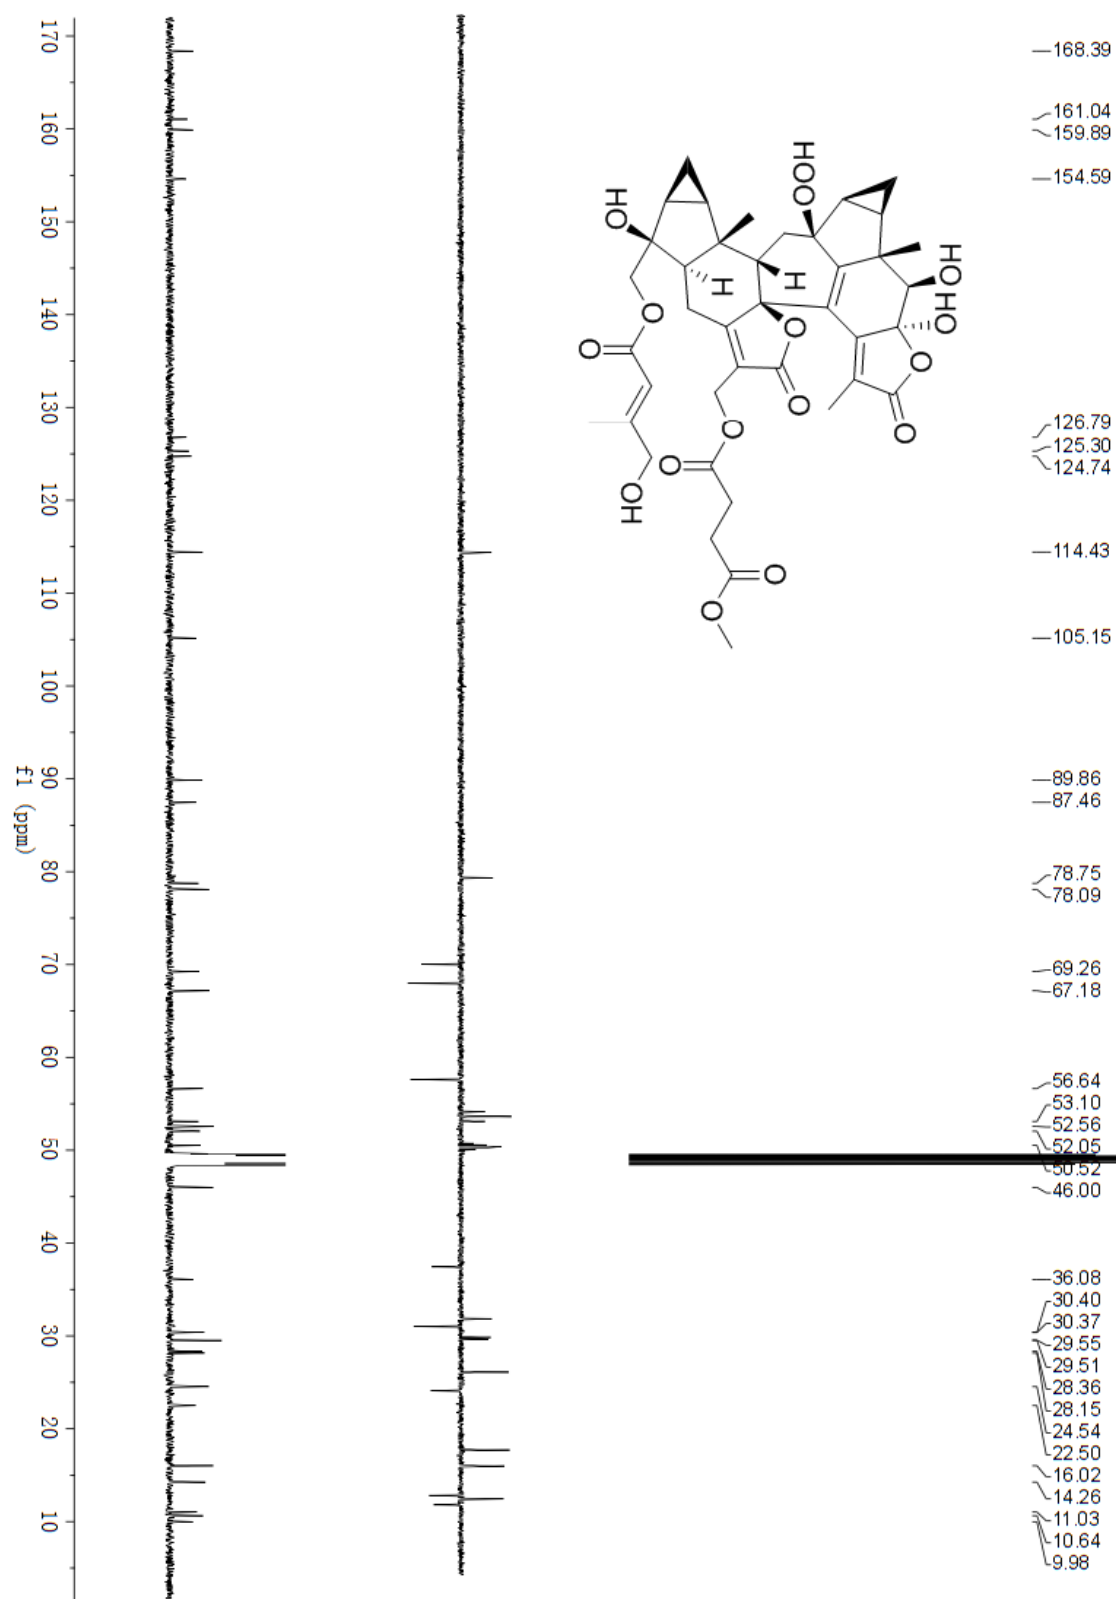

Figure S75. HSQC spectrum of fortunilide I (9) in CD<sub>3</sub>OD

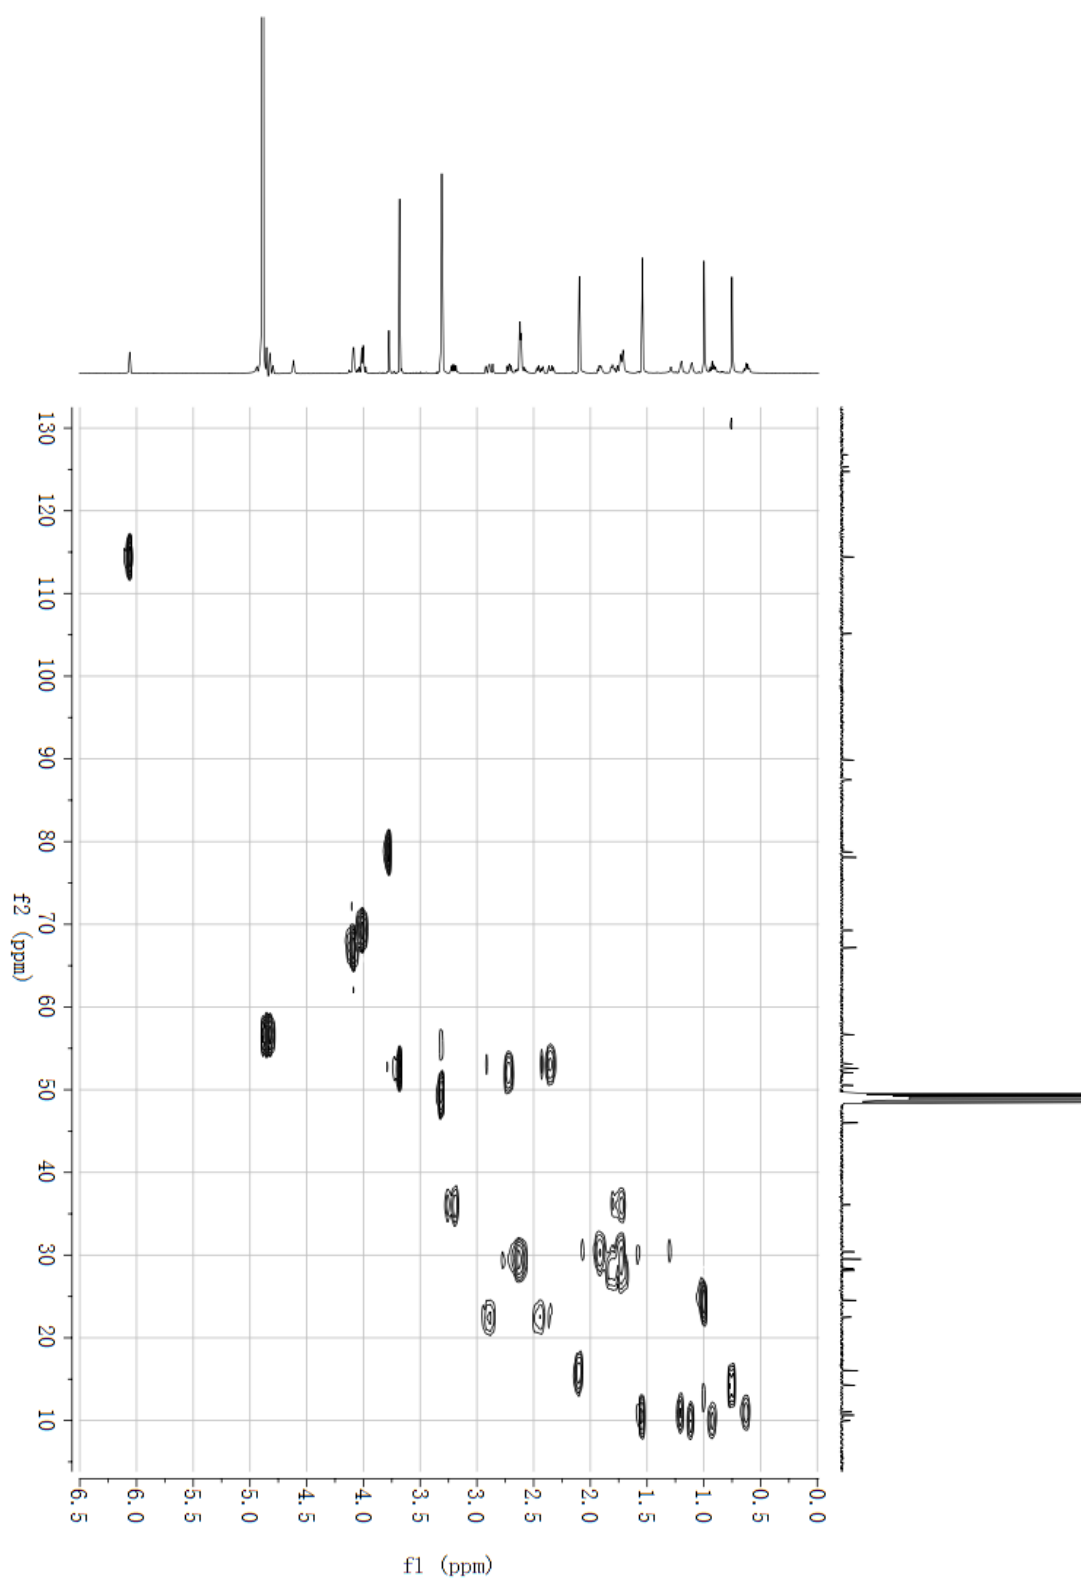



Figure S76. HMBC spectrum of fortunilide I (9) in CD<sub>3</sub>OD

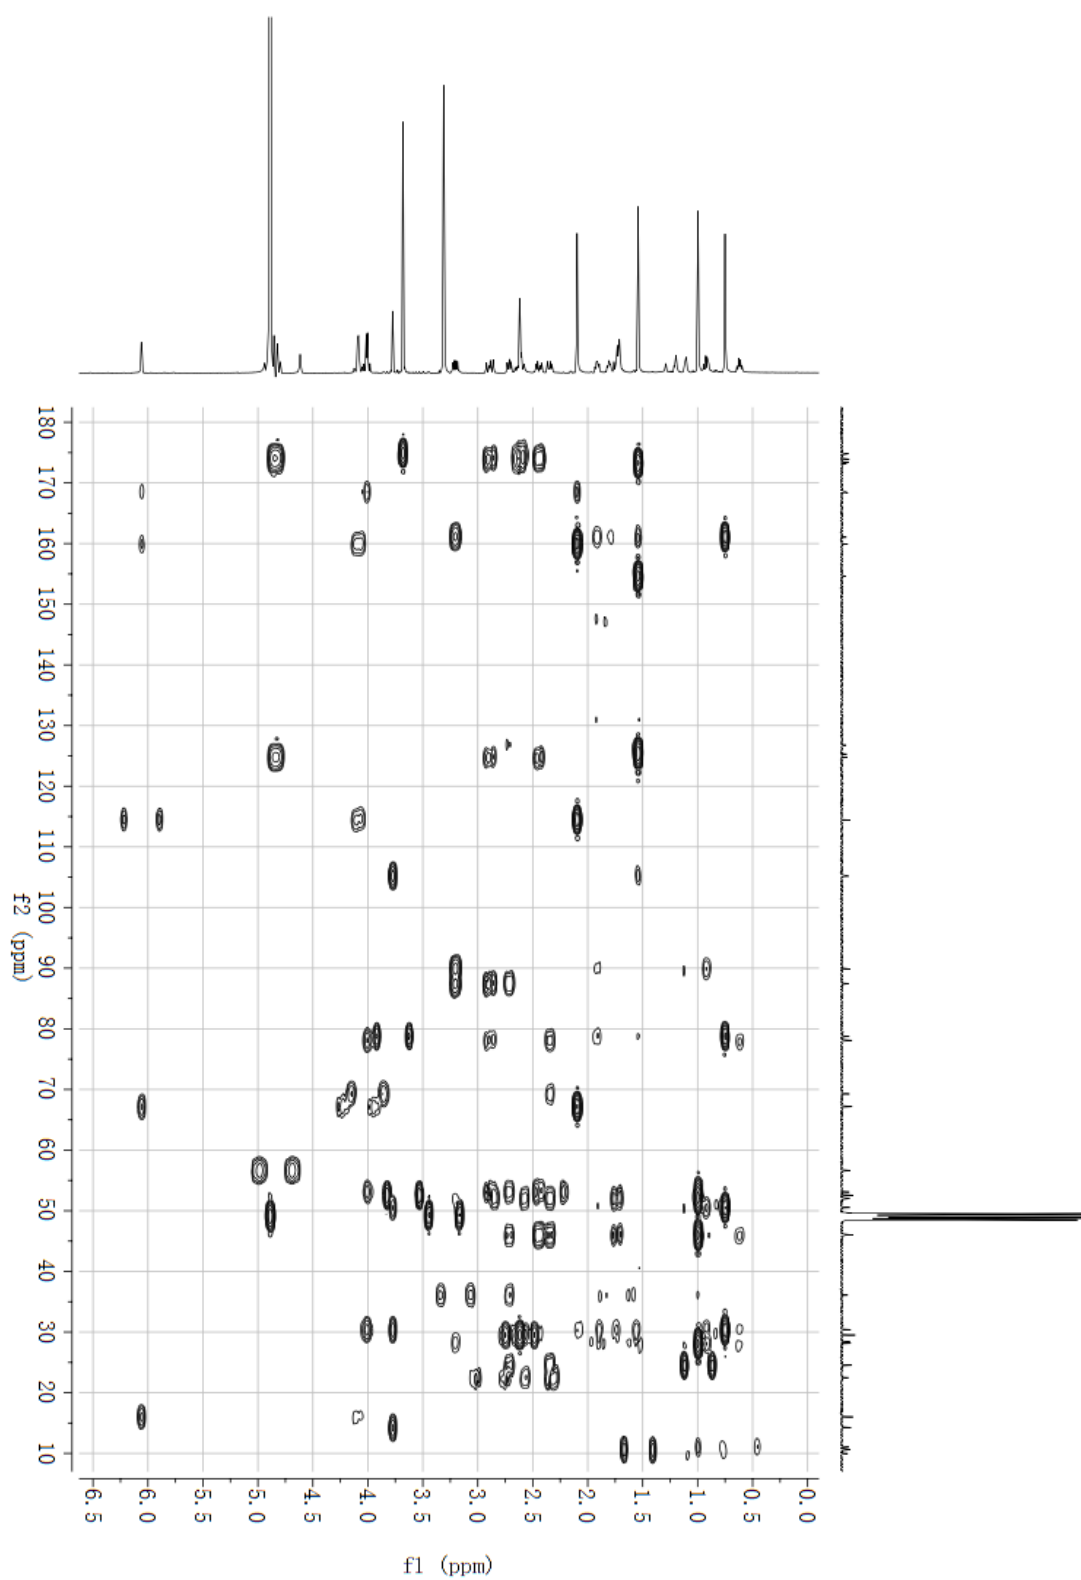

Figure S77. ROESY spectrum of fortunilide I (9)

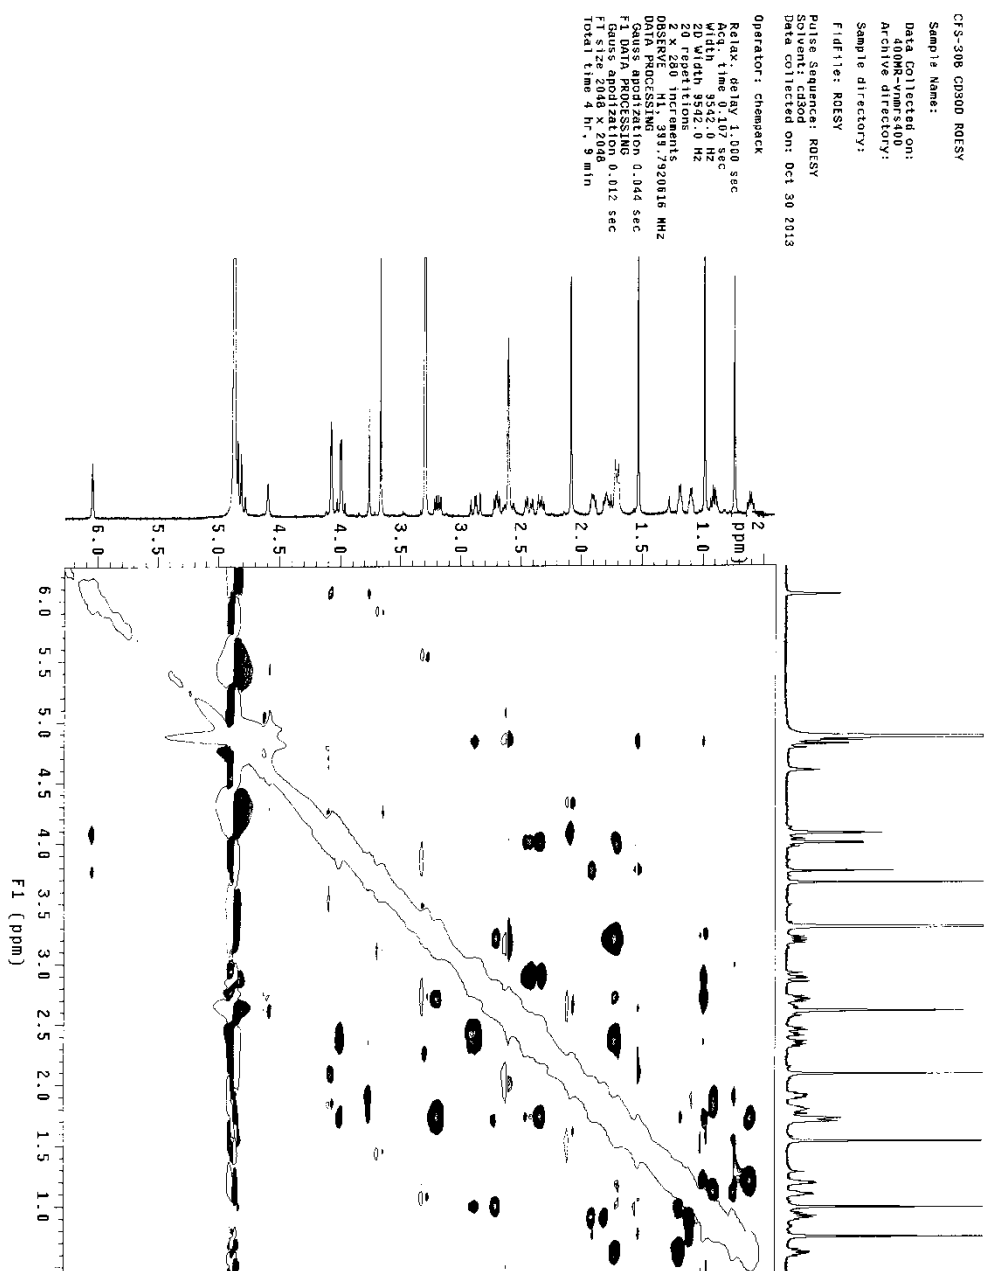

Figure S78. (+)-ESIMS spectrum of fortunilide I (9)

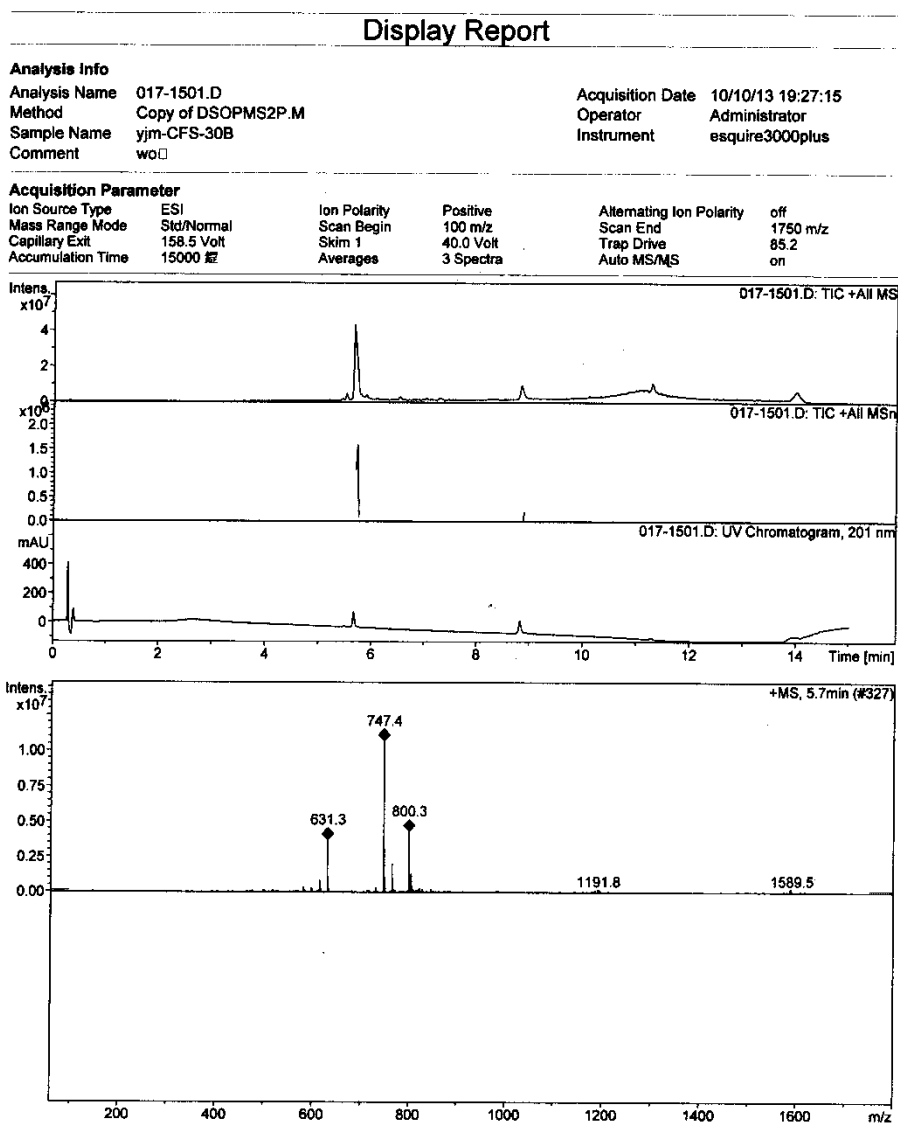

Figure S79. (-)-ESIMS spectrum of fortunilide I (9)

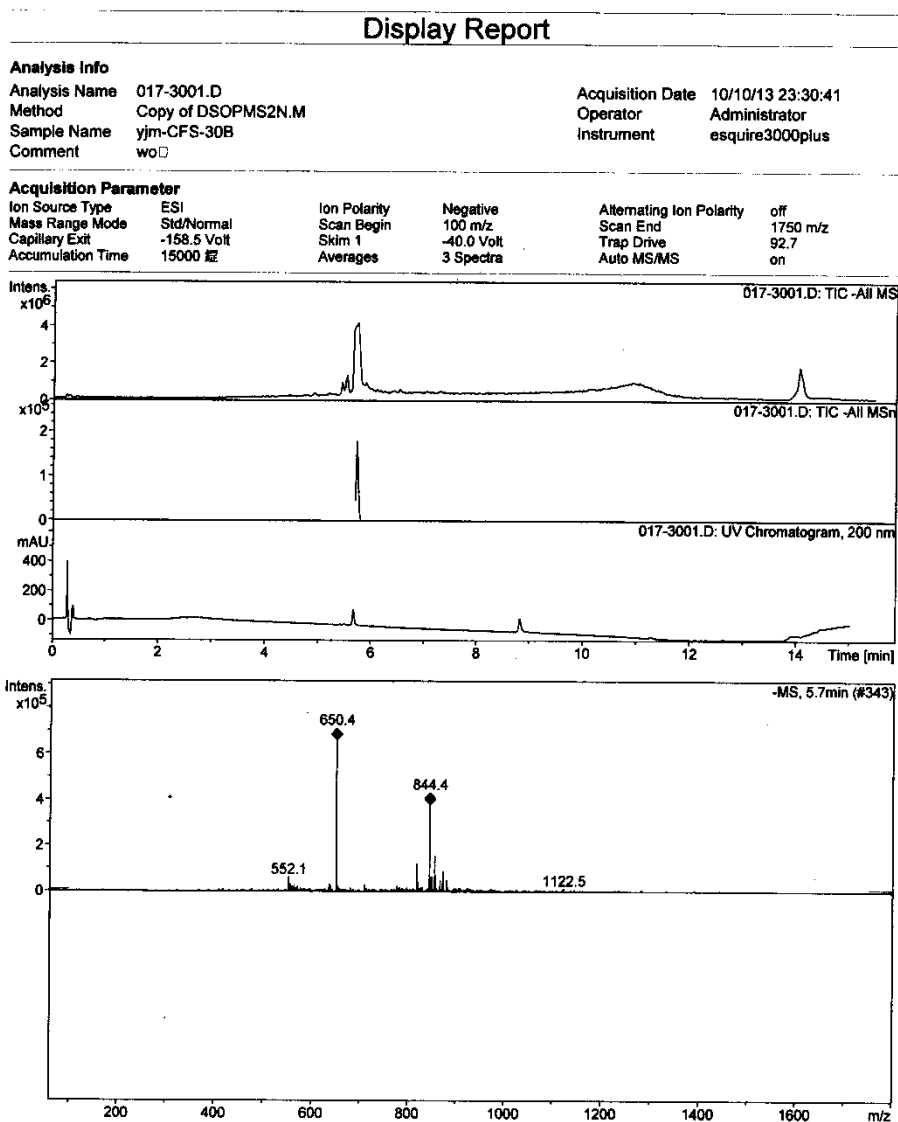

**Figure S80. (+)-HRESIMS spectrum of fortunilide I (9)**

**Elemental Composition Report**

**Page 1**

Tolerance = 10.0 PPM / DBE: min = -1.5, max = 50.0  
 Isotope cluster parameters: Separation = 1.0 Abundance = 1.0%

Monoisotopic Mass, Odd and Even Electron Ions  
 32 formula(e) evaluated with 1 results within limits (up to 20 closest results for each mass)

SIMM-Mass Spec Q-ToF Ultima 23-Oct-201314:53:44  
 CFS-30B  
 130938-2 146 (2.747) AM (Cen,5, 80.00, Ht,9000.0,656.16,0.70); Sm (Mn, 2x0.00); Cm (133:147) TOF MS ES+  
 1.18e3

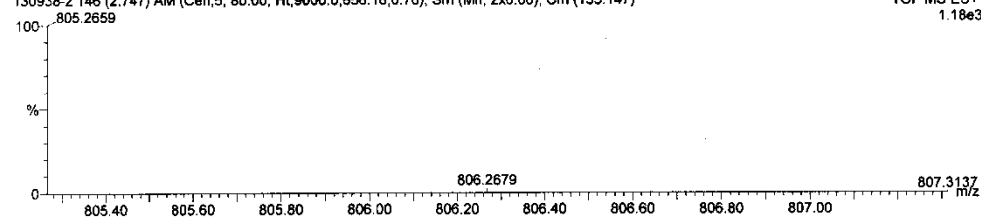

| Mass     | RA     | Calc. Mass | mDa  | PPM  | DBE  | Score | Formula        |
|----------|--------|------------|------|------|------|-------|----------------|
| 805.2659 | 100.00 | 805.2684   | -2.5 | -3.0 | 17.5 | 1     | C40 H46 O16 Na |

Figure S81. IR spectrum of fortunilide I (9)

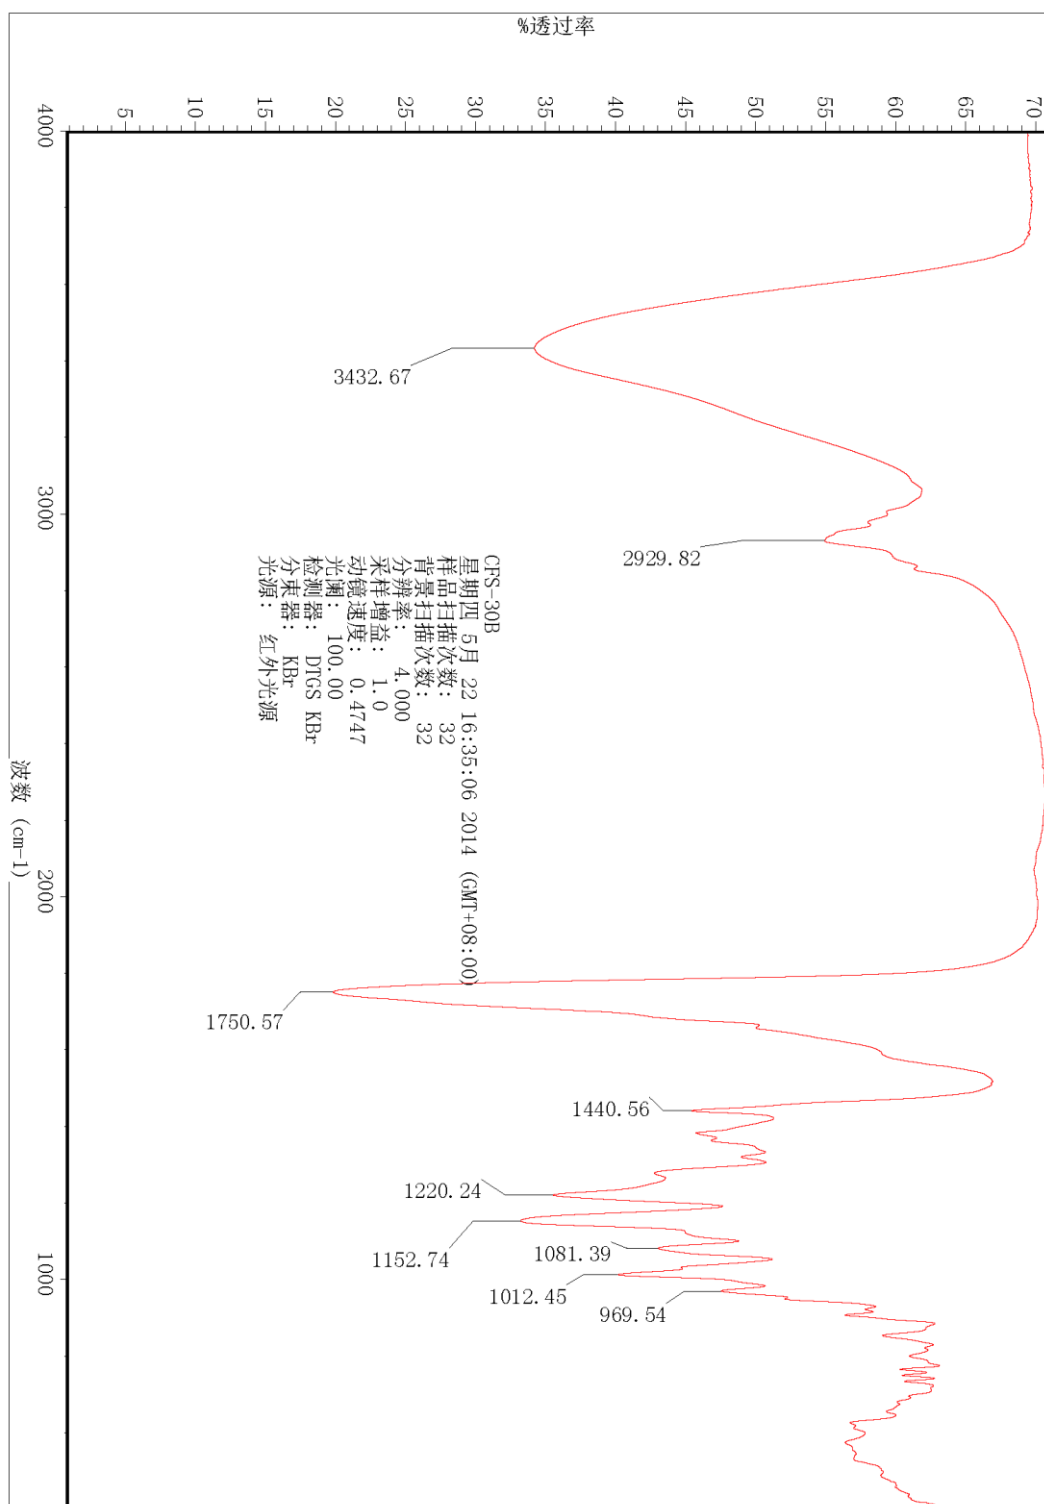

Figure S82.  $^1\text{H}$  NMR spectrum of fortunilide J (10) in  $\text{CD}_3\text{OD}$

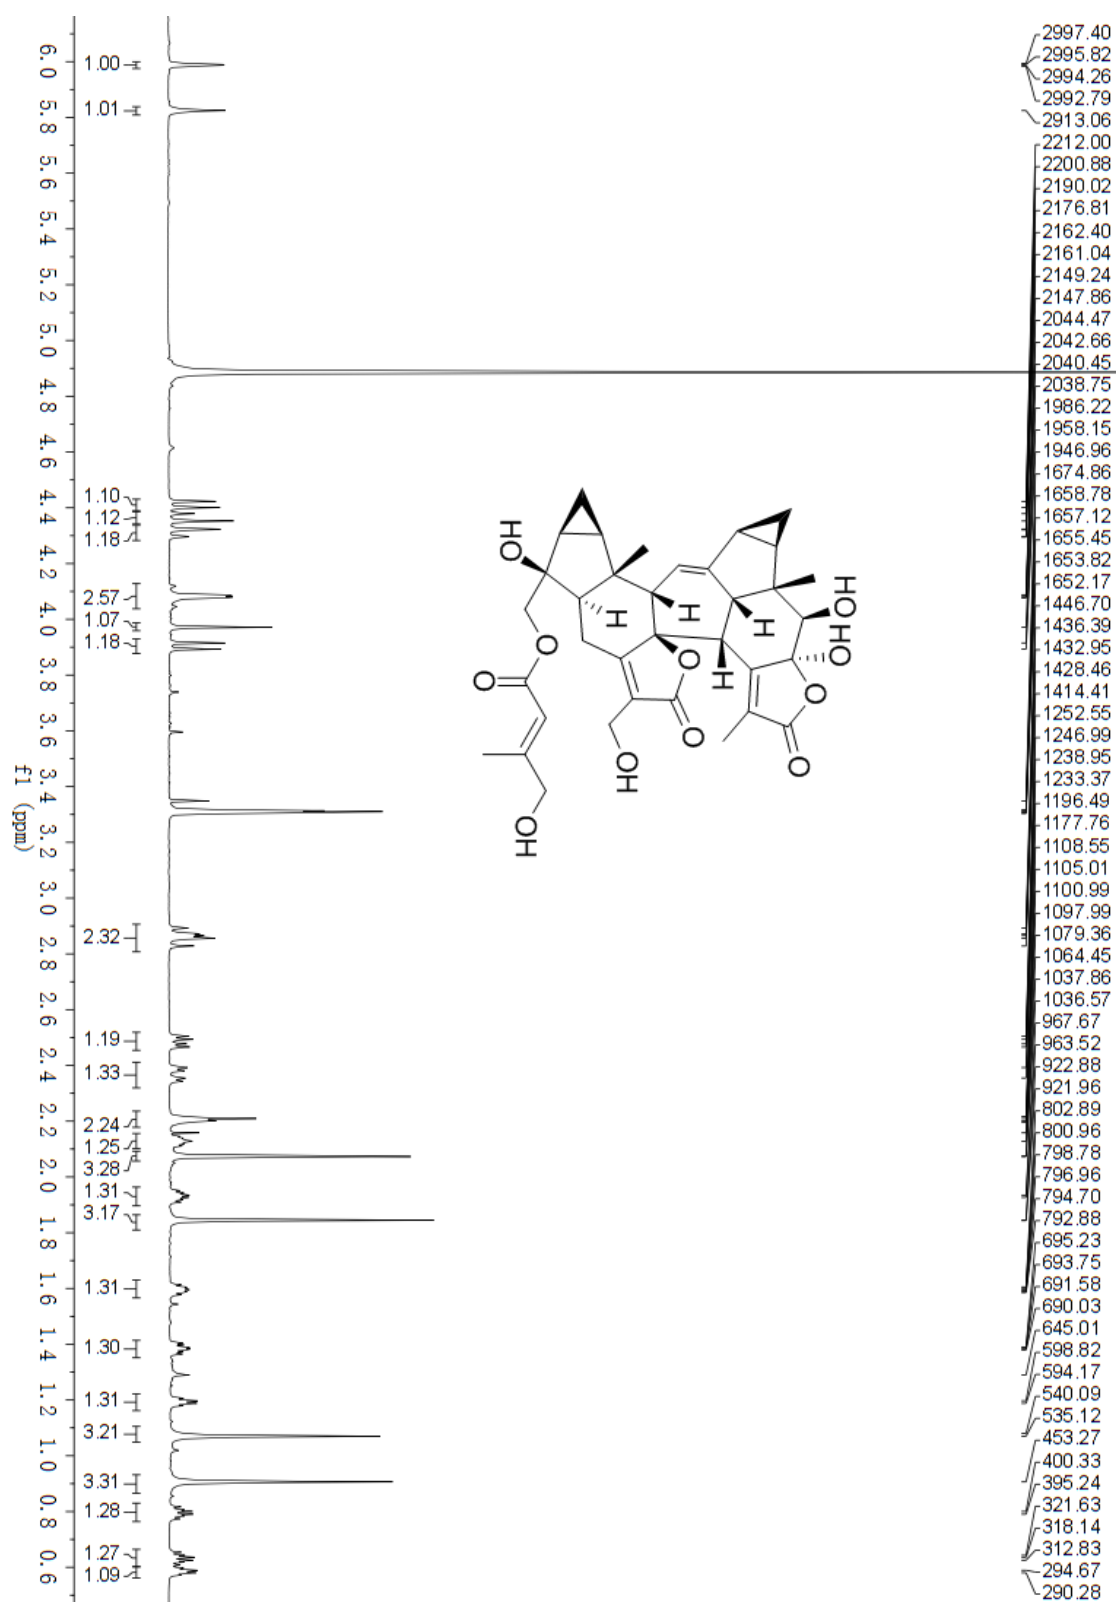

Figure S83.  $^{13}\text{C}$  NMR spectrum of fortunilide J (10) in  $\text{CD}_3\text{OD}$

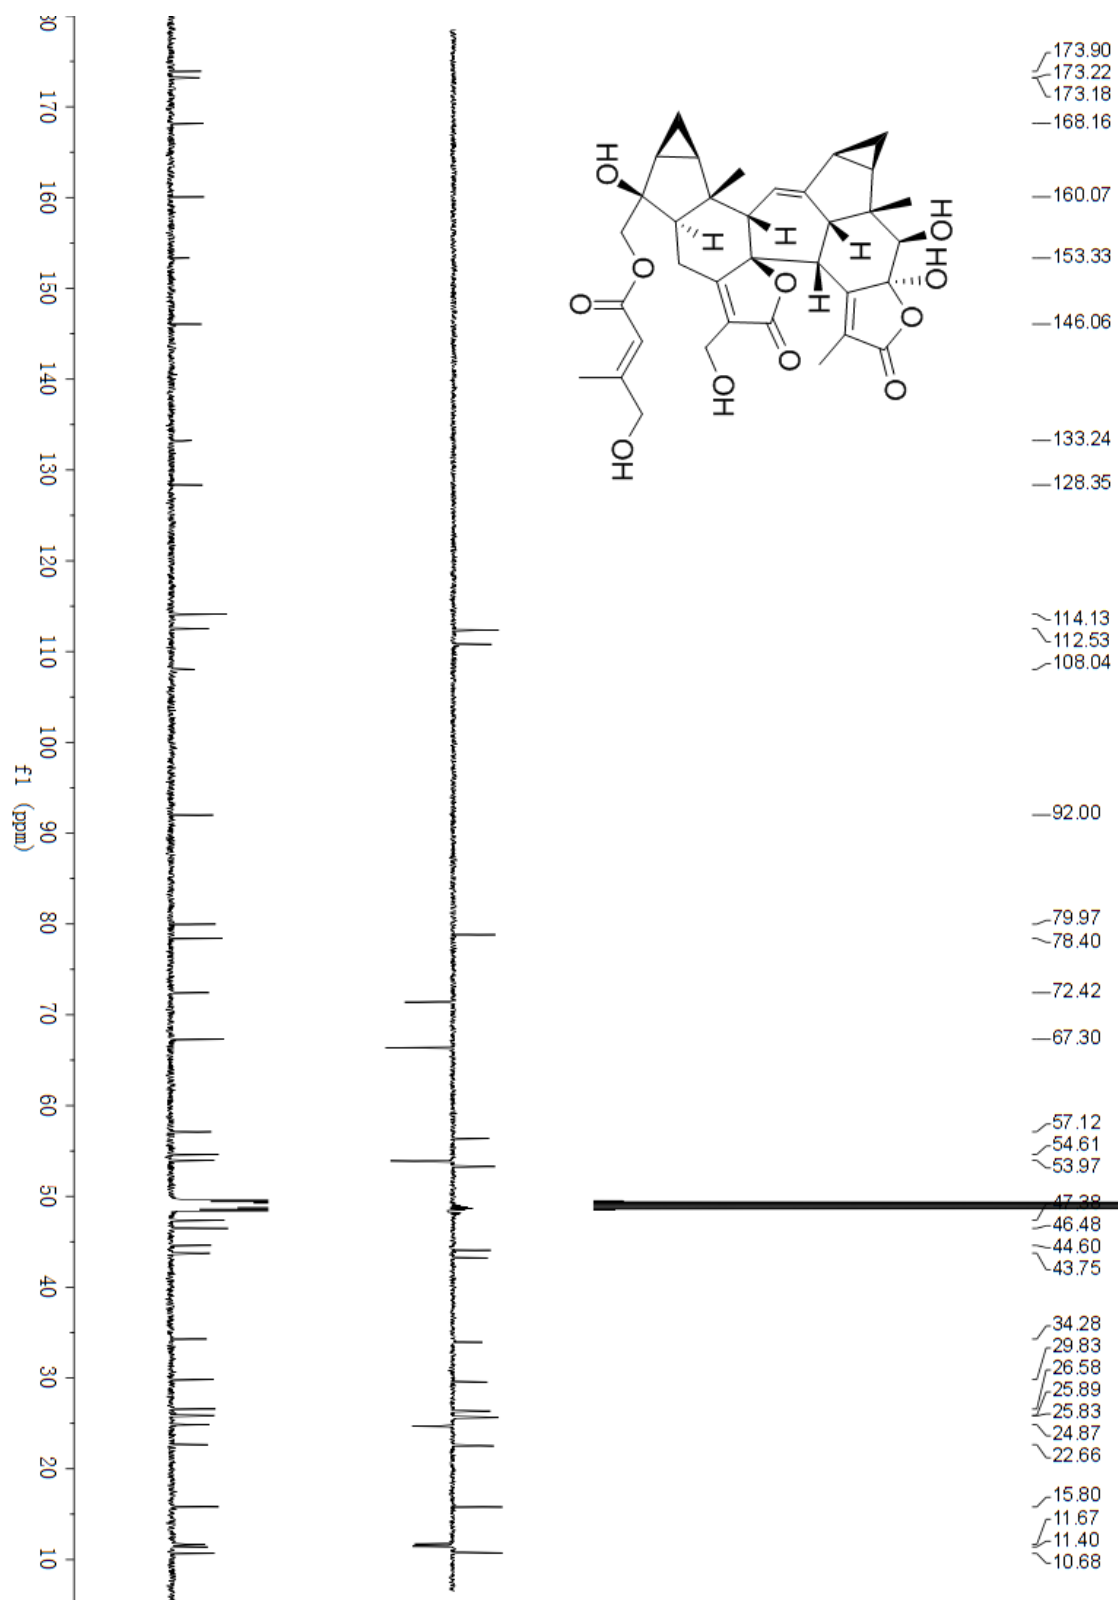



Figure S84. HSQC spectrum of fortunilide J (10) in CD<sub>3</sub>OD

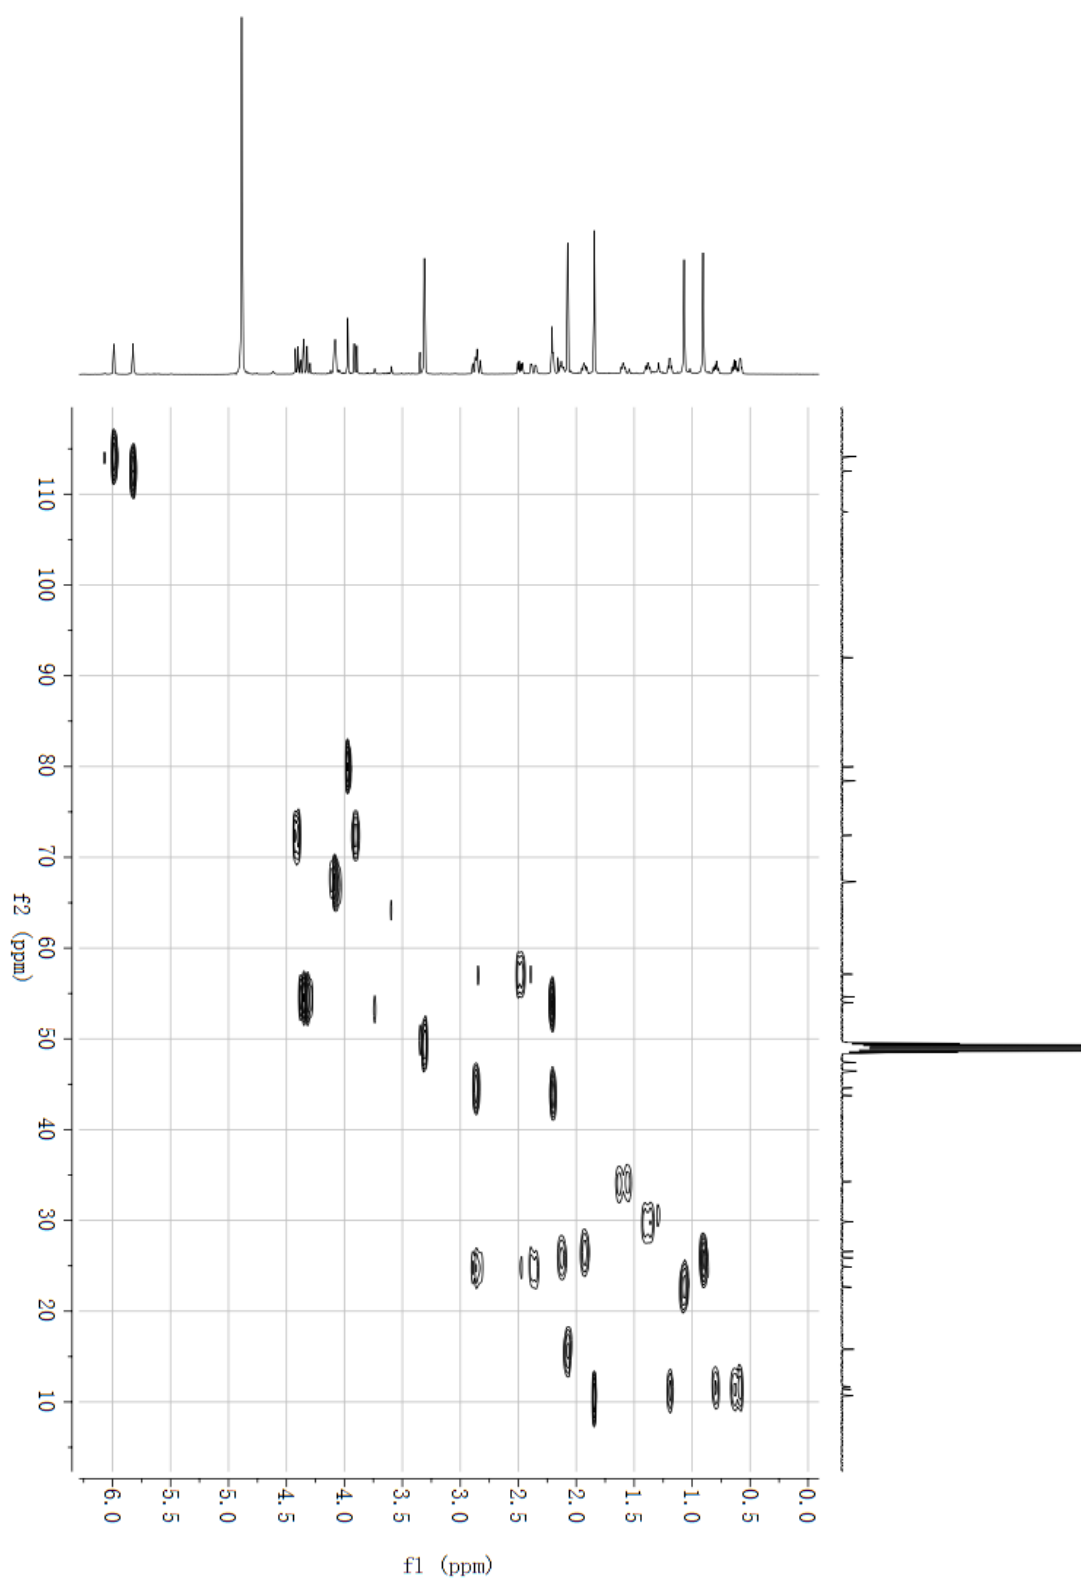

Figure S85. HMBC spectrum of fortunilide J (10) in CD<sub>3</sub>OD

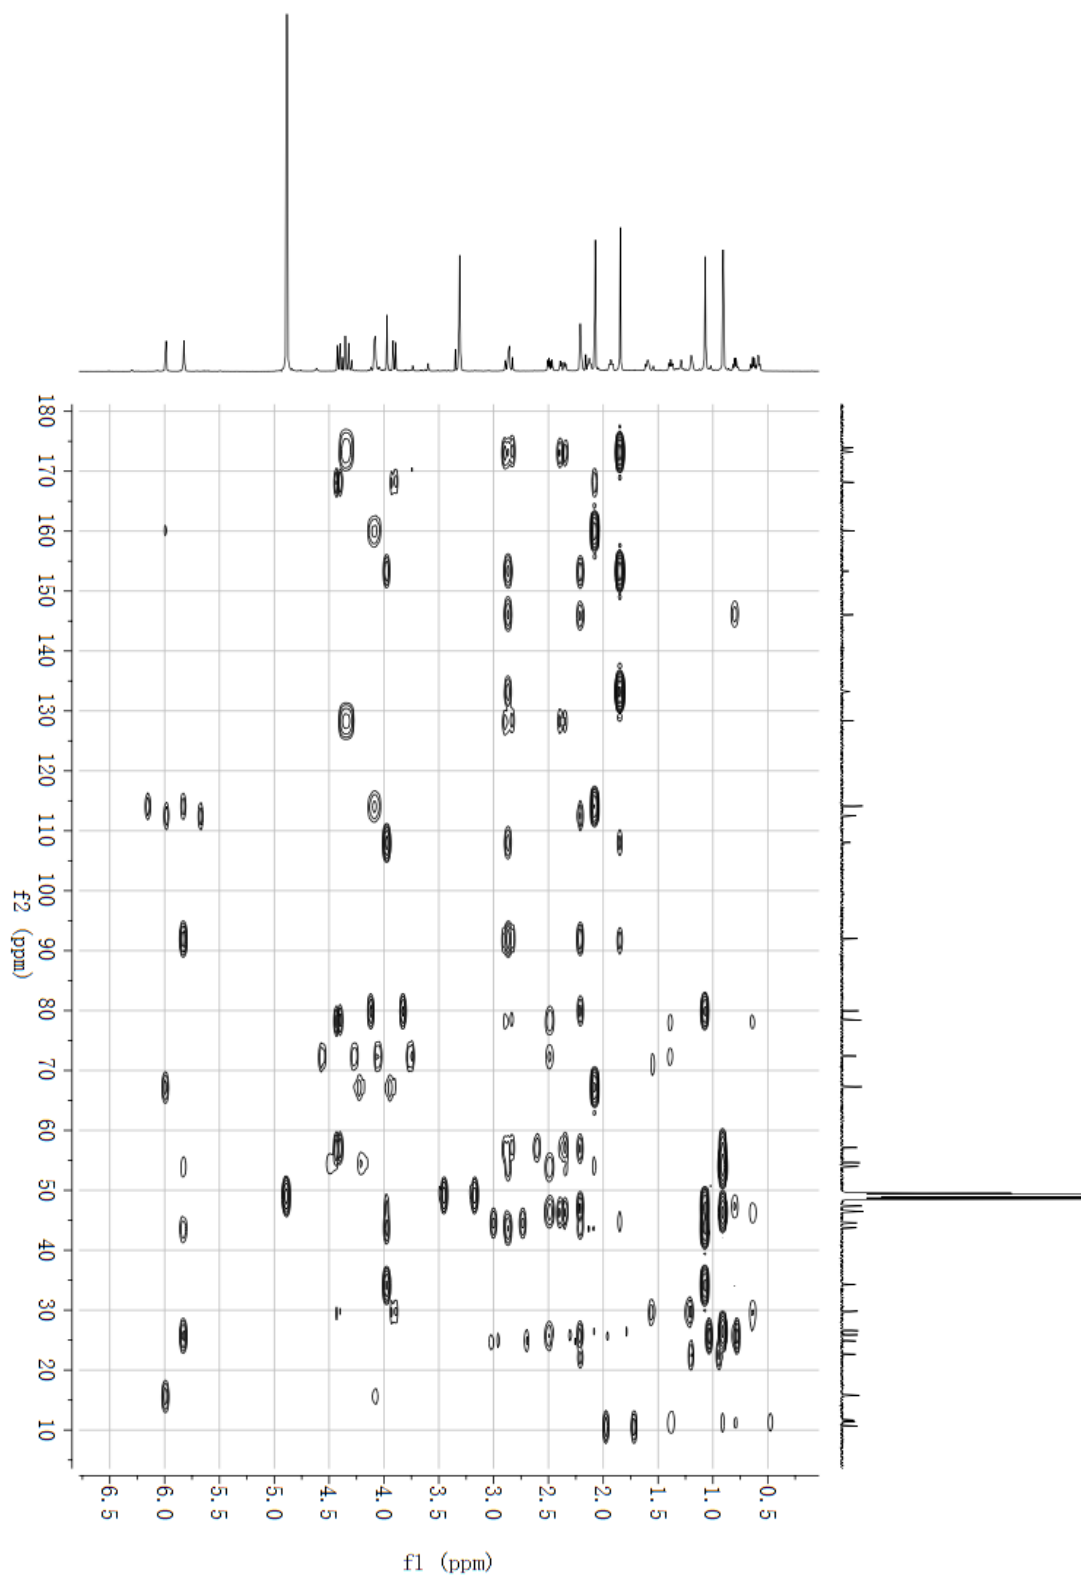

Figure S86. ROESY spectrum of fortunilide J (10)

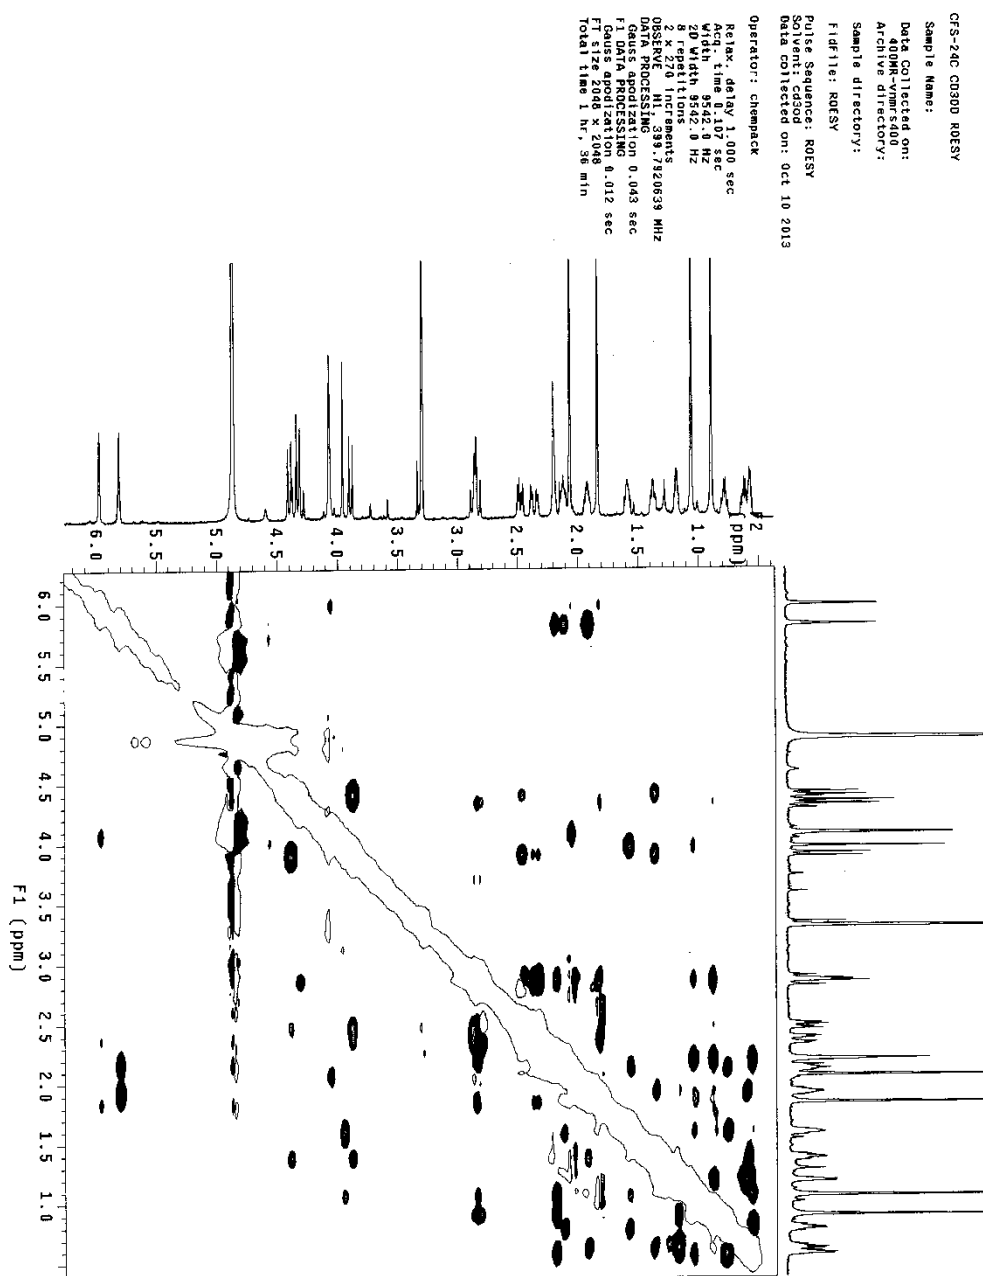

Figure S87. (+)-ESIMS spectrum of fortunilide J (10)

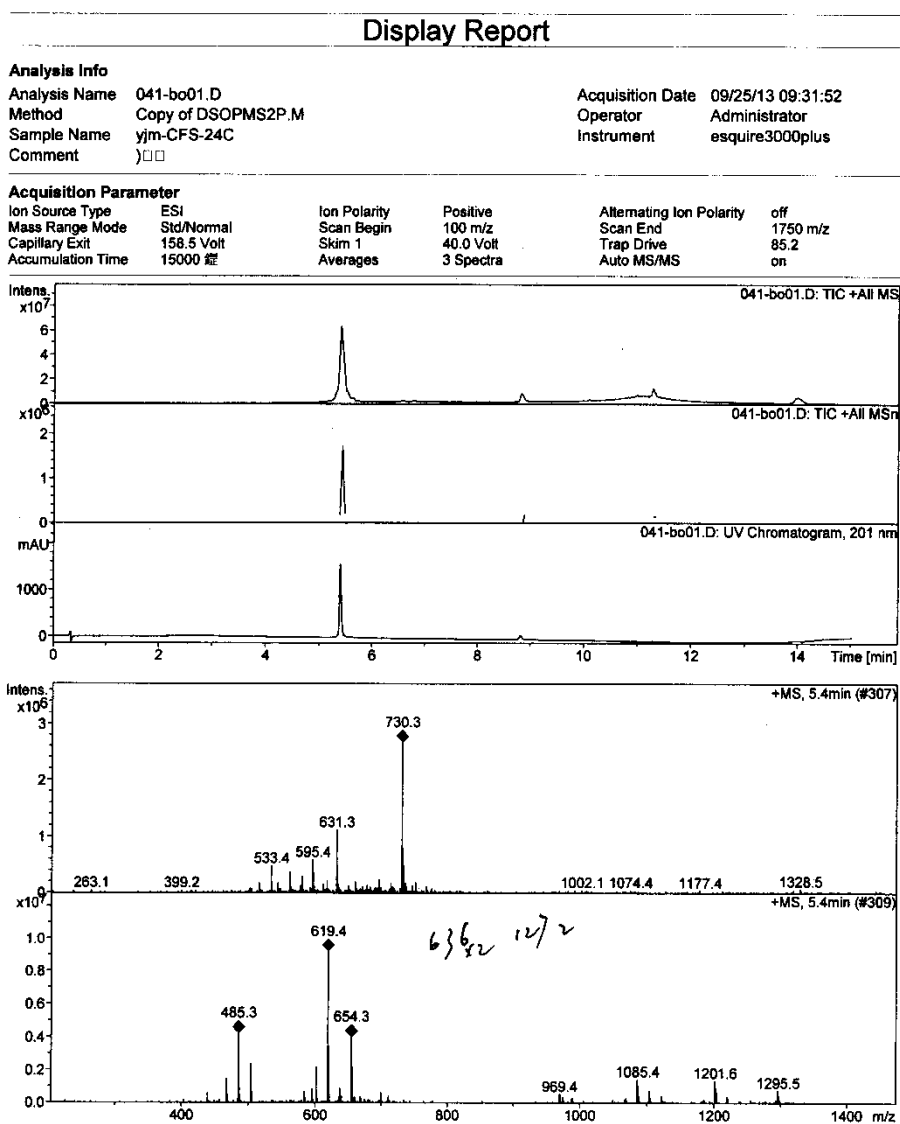

Figure S88. (-)-ESIMS spectrum of fortunilide J (10)

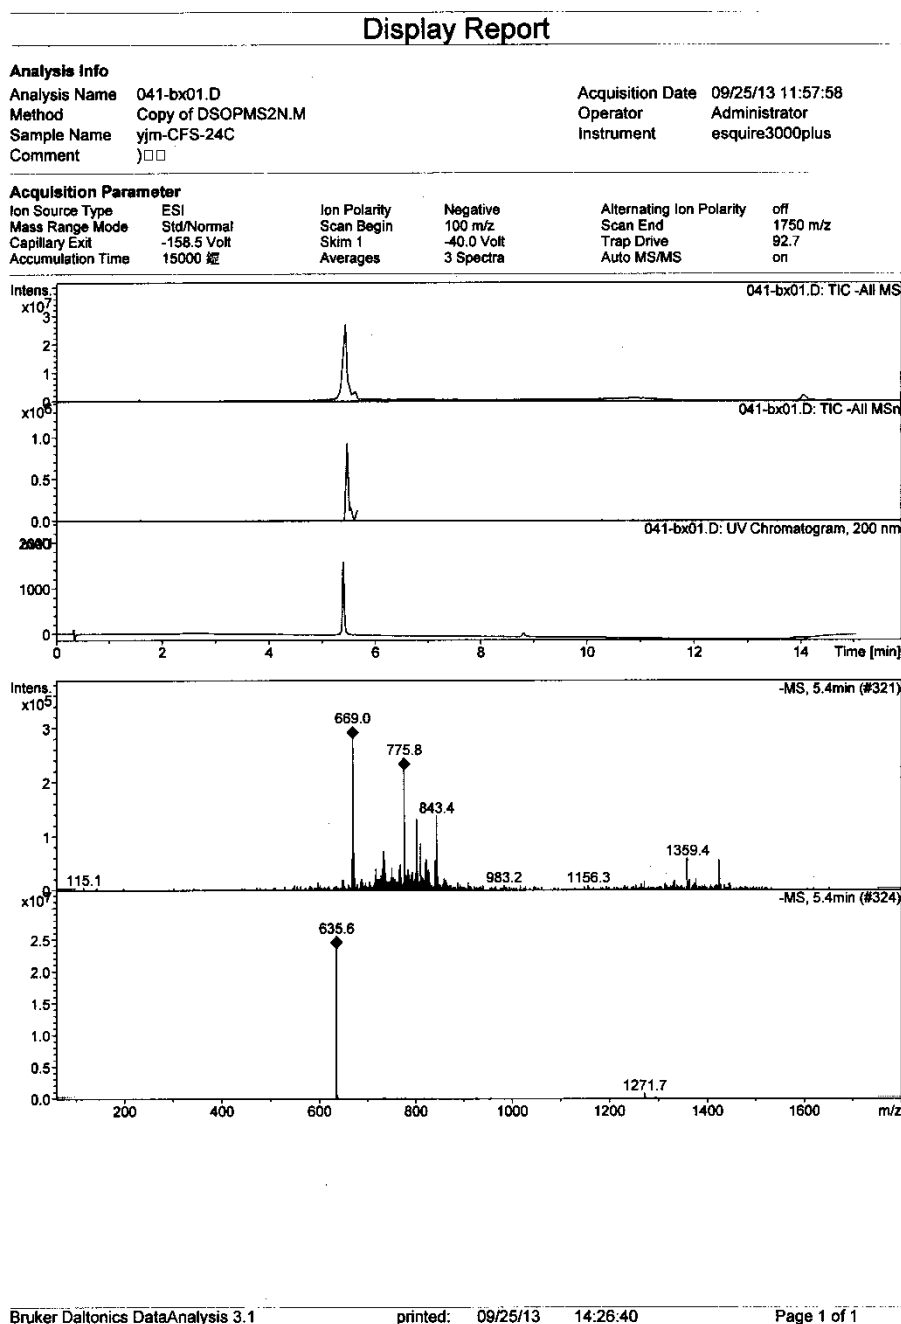

Figure S89. (-)-HRESIMS spectrum of fortunilide J (10)

Elemental Composition Report

Page 1

Single Mass Analysis

Tolerance = 10.0 PPM / DBE: min = -1.5, max = 50.0

Element prediction: Off

Number of isotope peaks used for i-FIT = 3

Monoisotopic Mass, Even Electron Ions

135 formula(e) evaluated with 2 results within limits (up to 50 closest results for each mass)

Elements Used:

C: 5-80 H: 2-120 O: 0-20

CFS-24C

LCT PXE KE324

27-Sep-2013

10:42:02

1: TOF MS ES-

1.92e+004

CFS-24C\_0927 31 (0.687) AM2 (Ar,10000.0,0.00,1.00); ABS; Cm (19:35)

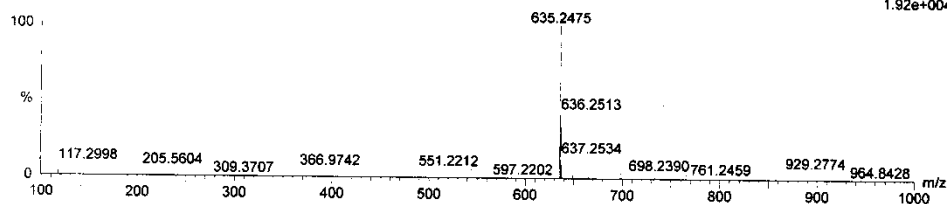

| Mass     | Calc. Mass | mDa  | PPM  | DBE  | i-FIT | i-FIT (Norm) | Formula     |
|----------|------------|------|------|------|-------|--------------|-------------|
| 635.2475 | 635.2492   | -1.7 | -2.7 | 16.5 | 56.3  | 0.0          | C35 H39 O11 |
|          | 635.2434   | 4.1  | 6.5  | 25.5 | 63.5  | 7.3          | C42 H35 O6  |

Figure S90. IR spectrum of fortunilide J (10)

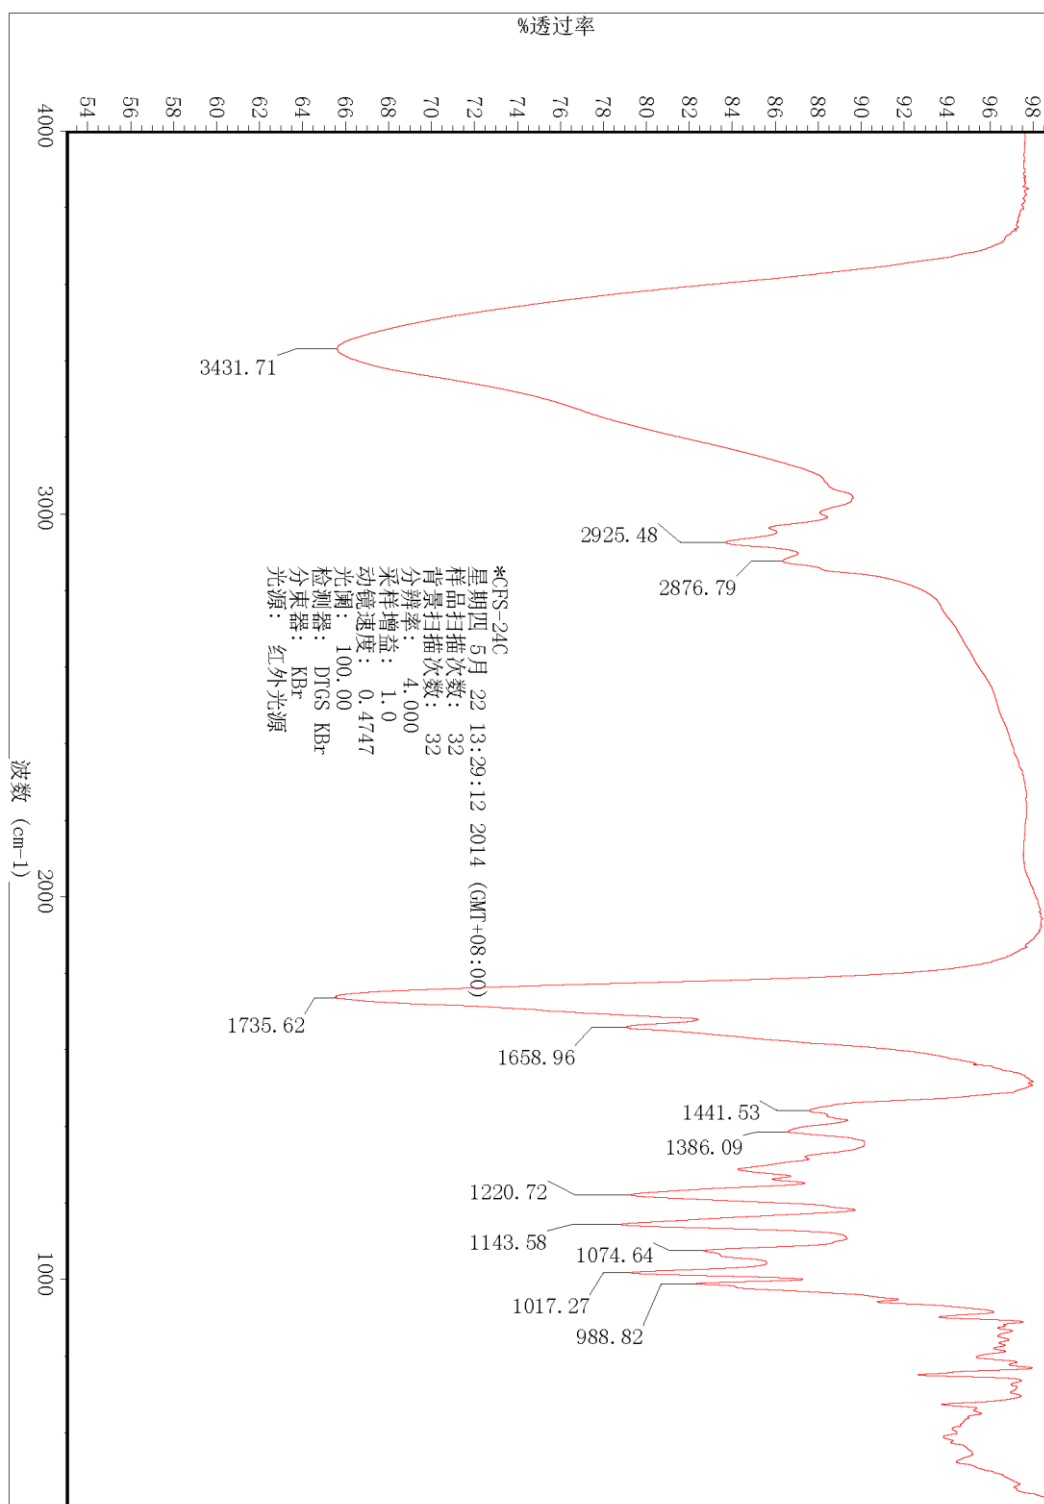

Figure S91. <sup>1</sup>H NMR spectrum of fortunilide K (11) in CDCl<sub>3</sub>

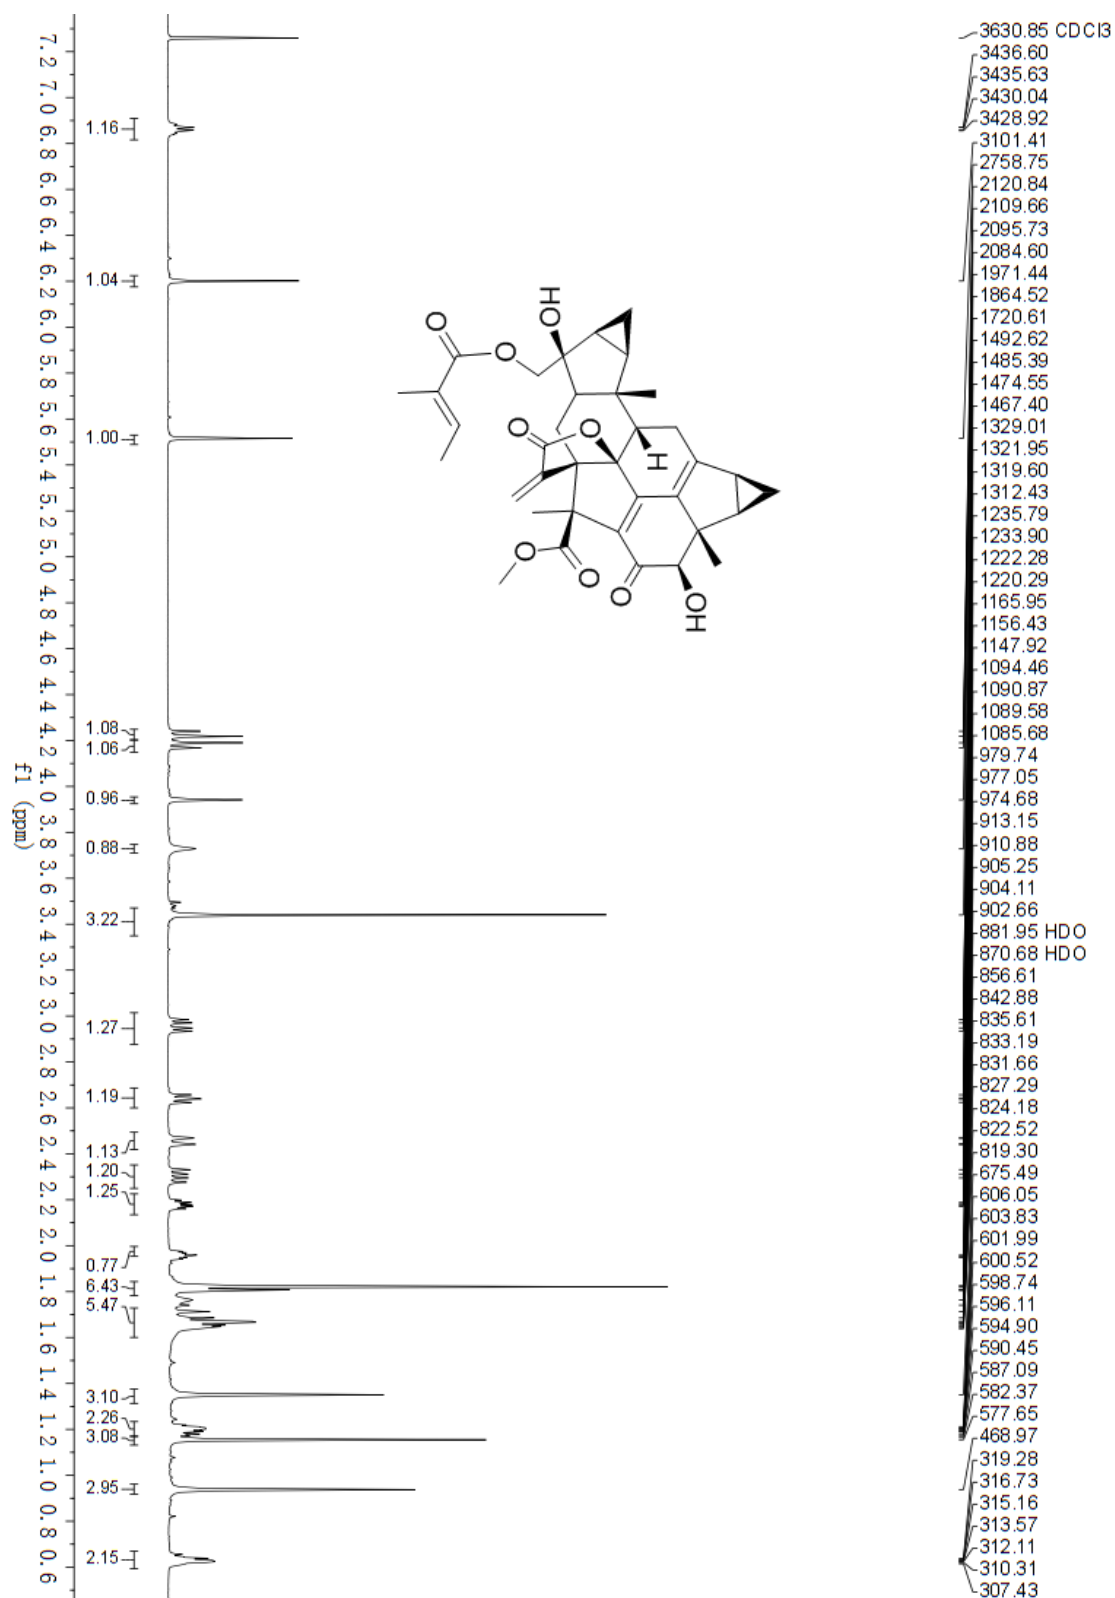



Figure S92.  $^{13}\text{C}$  NMR spectrum of fortunilide K (11) in  $\text{CDCl}_3$

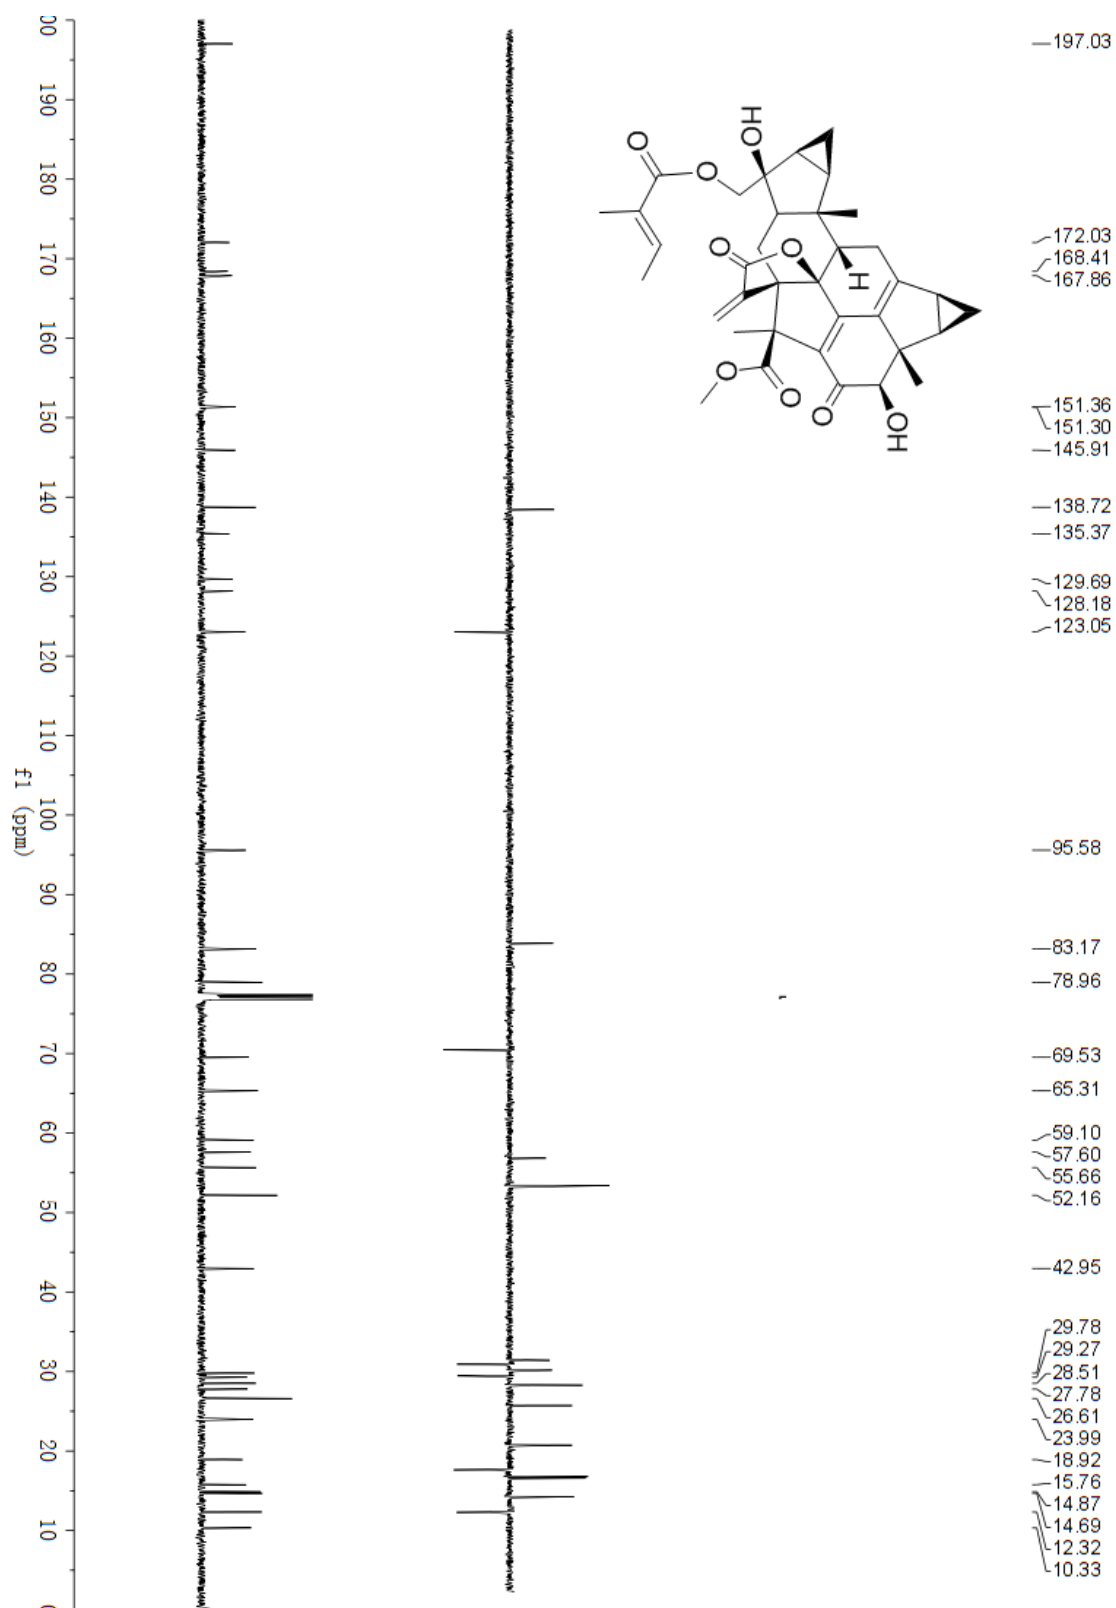

Figure S93. H-H COSY spectrum of fortunilide K (11) in CDCl<sub>3</sub>

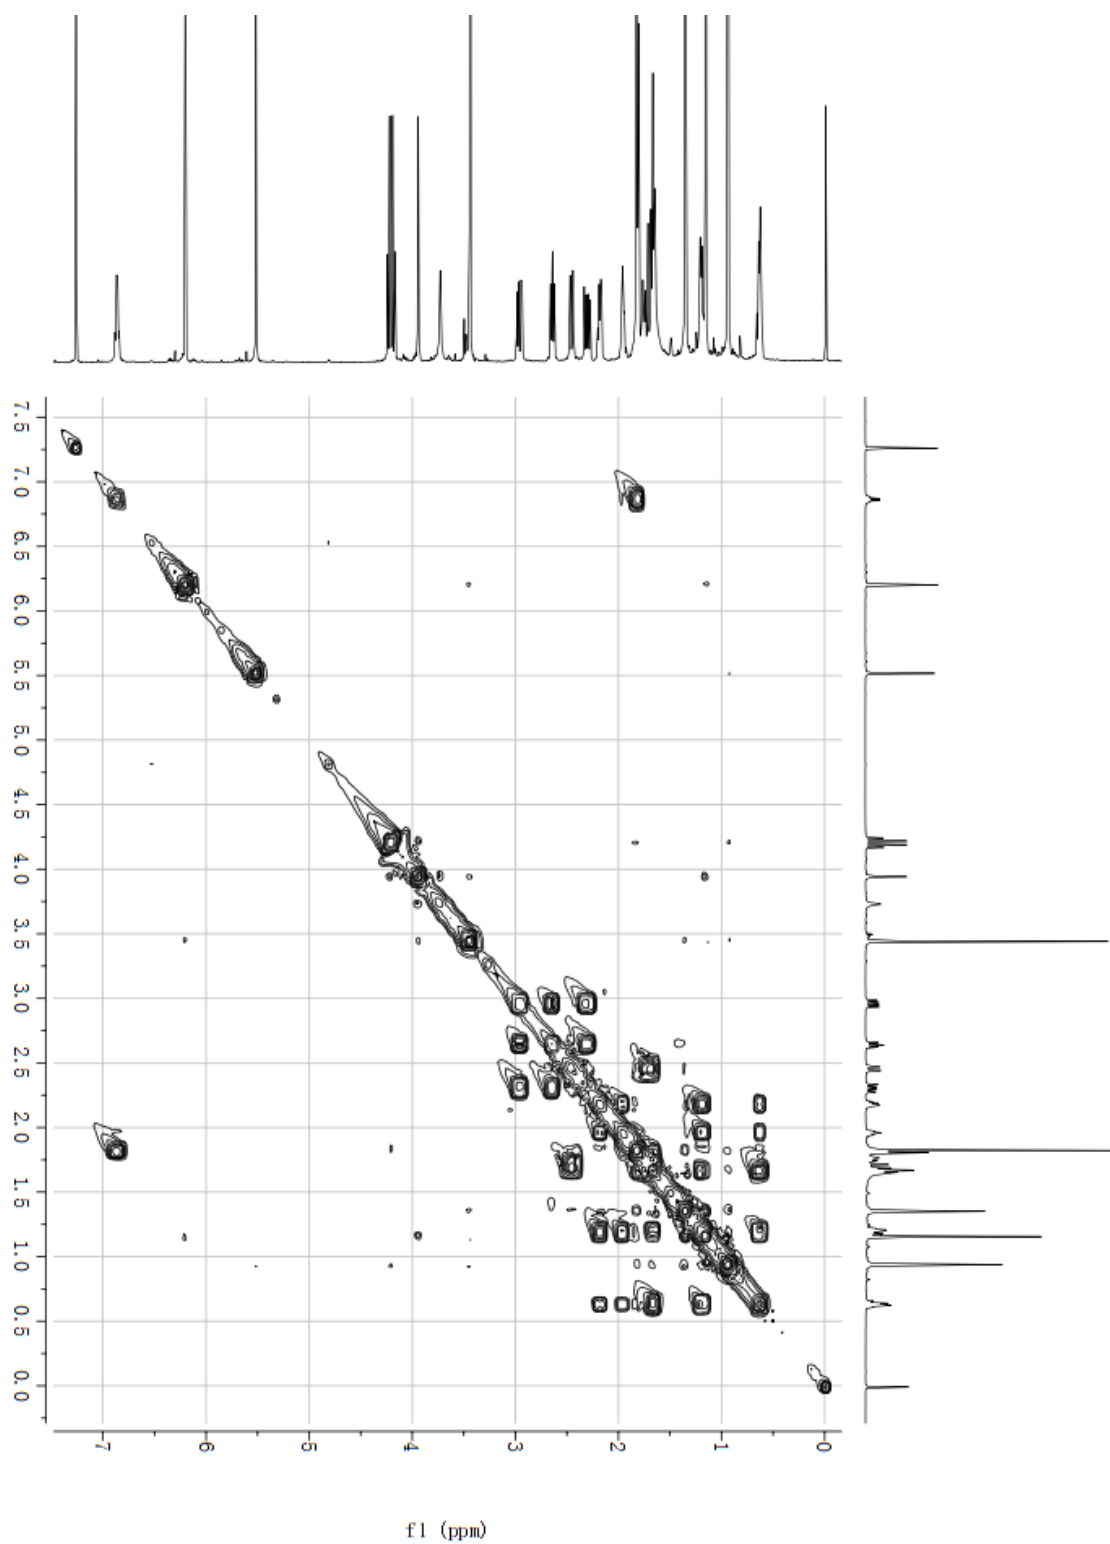

Figure S94. HSQC spectrum of fortunilide K (11) in CDCl<sub>3</sub>

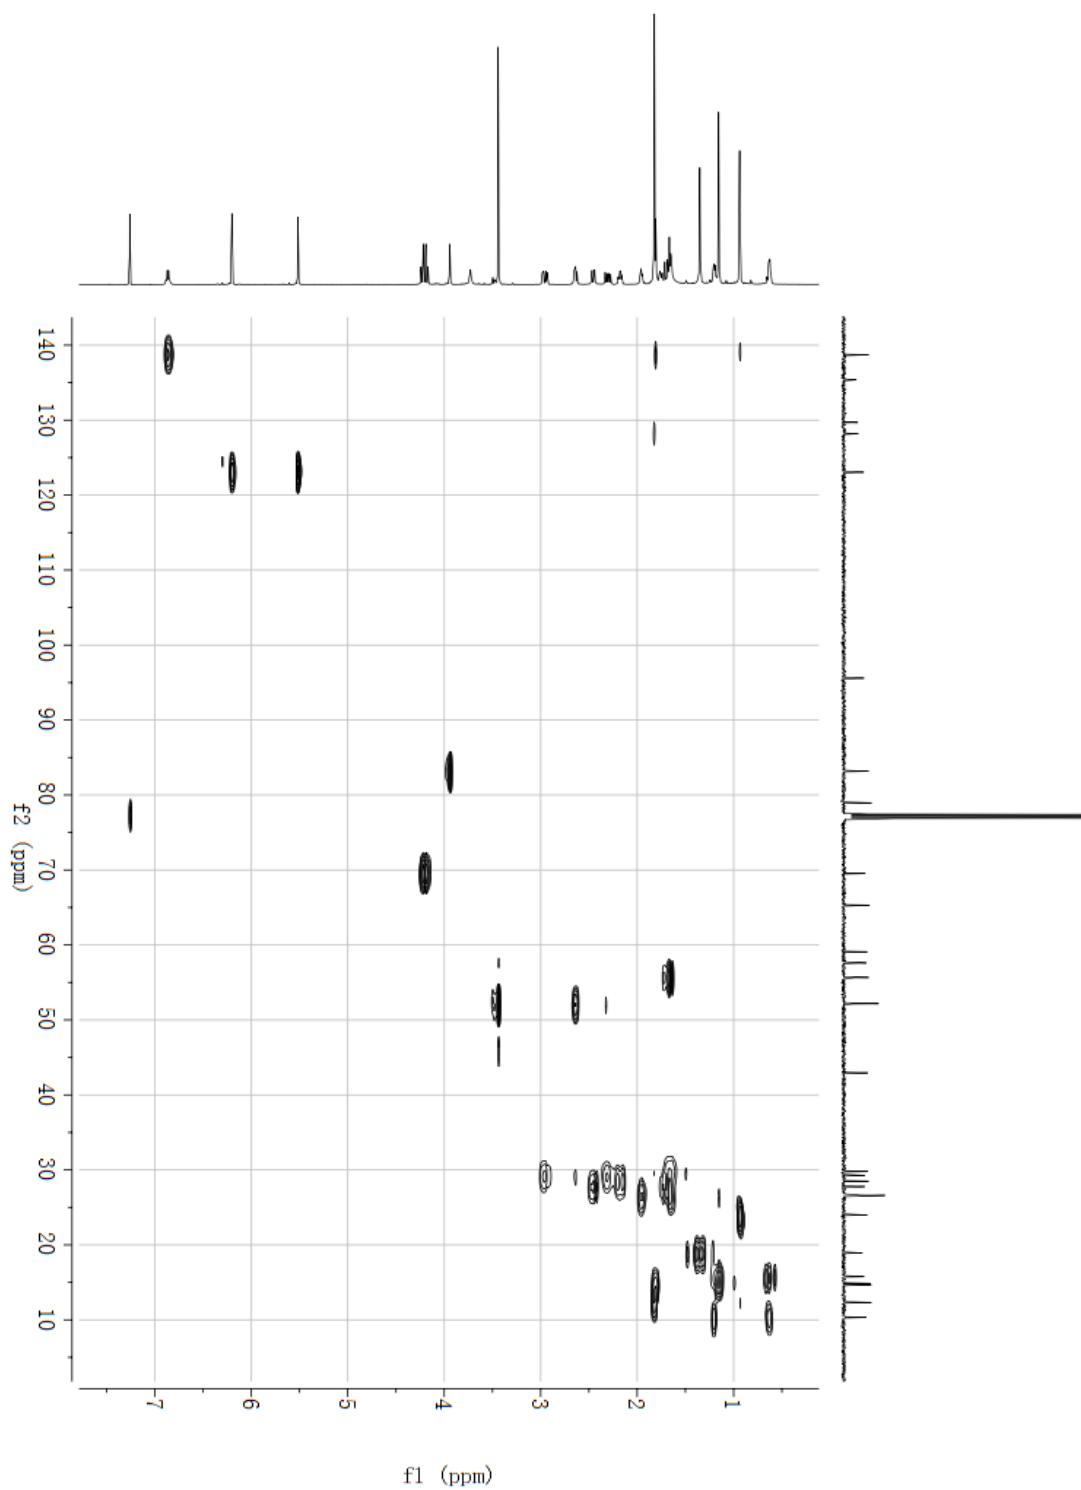

Figure S95. HMBC spectrum of fortunilid K (11) in CDCl<sub>3</sub>

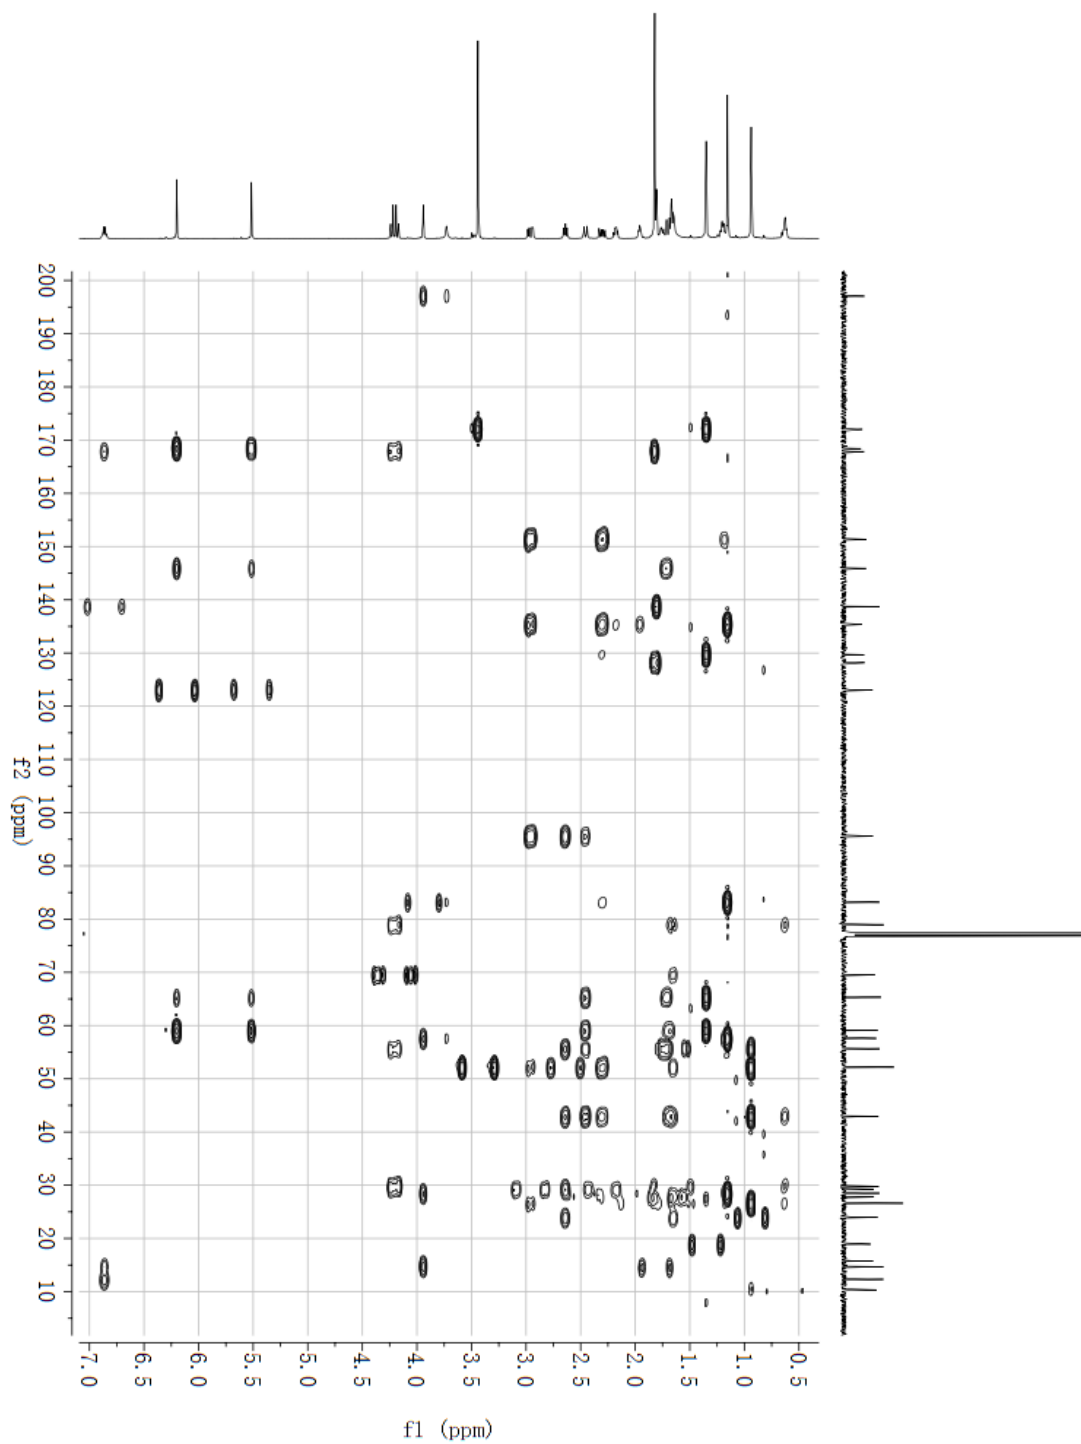

Figure S96. ROESY spectrum of fortunilide K (11)

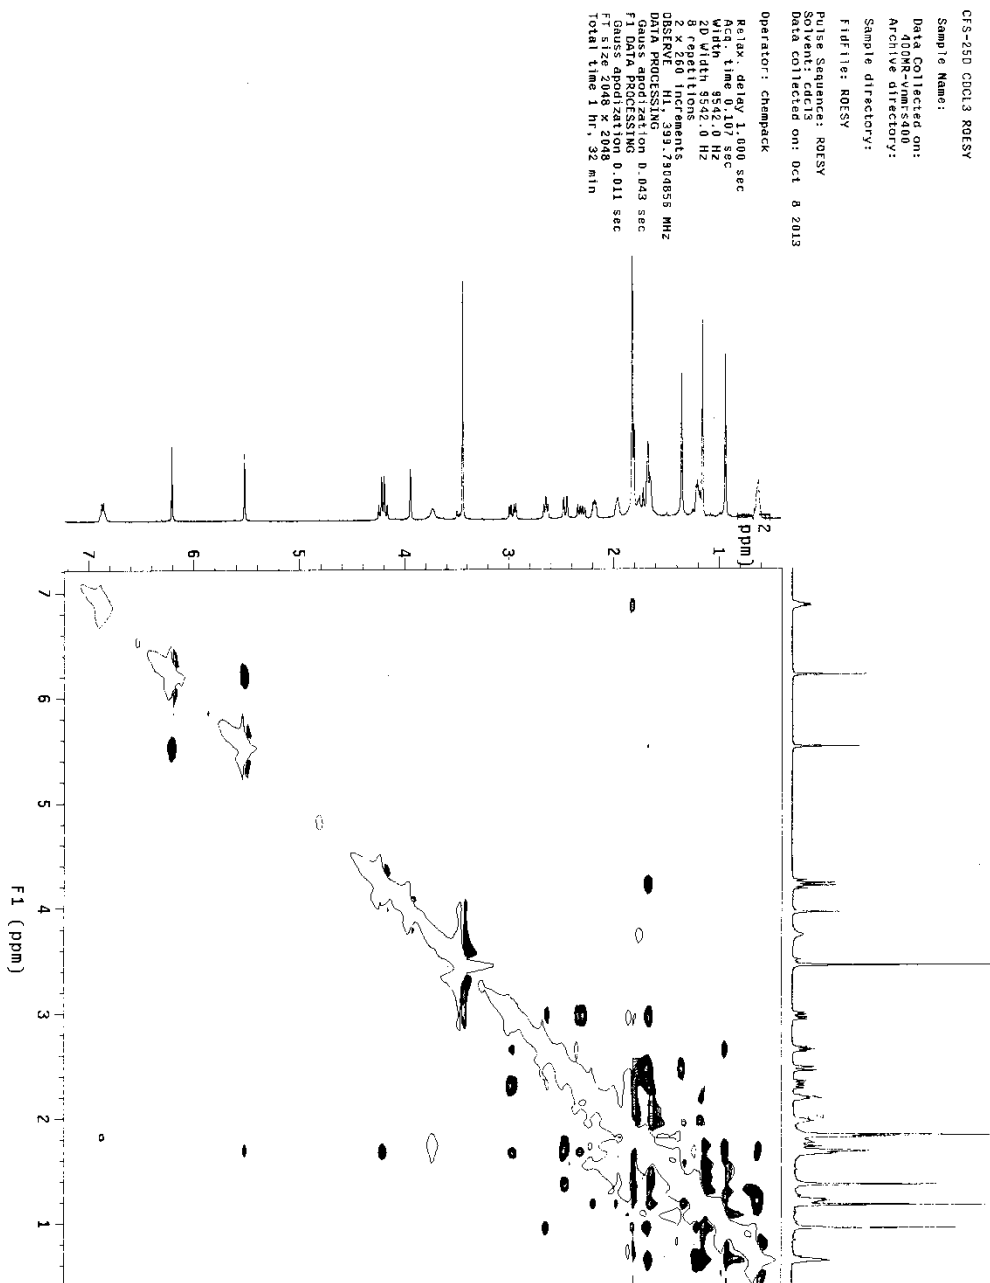

Figure S97. (+)-ESIMS spectrum of fortunilide K (11)

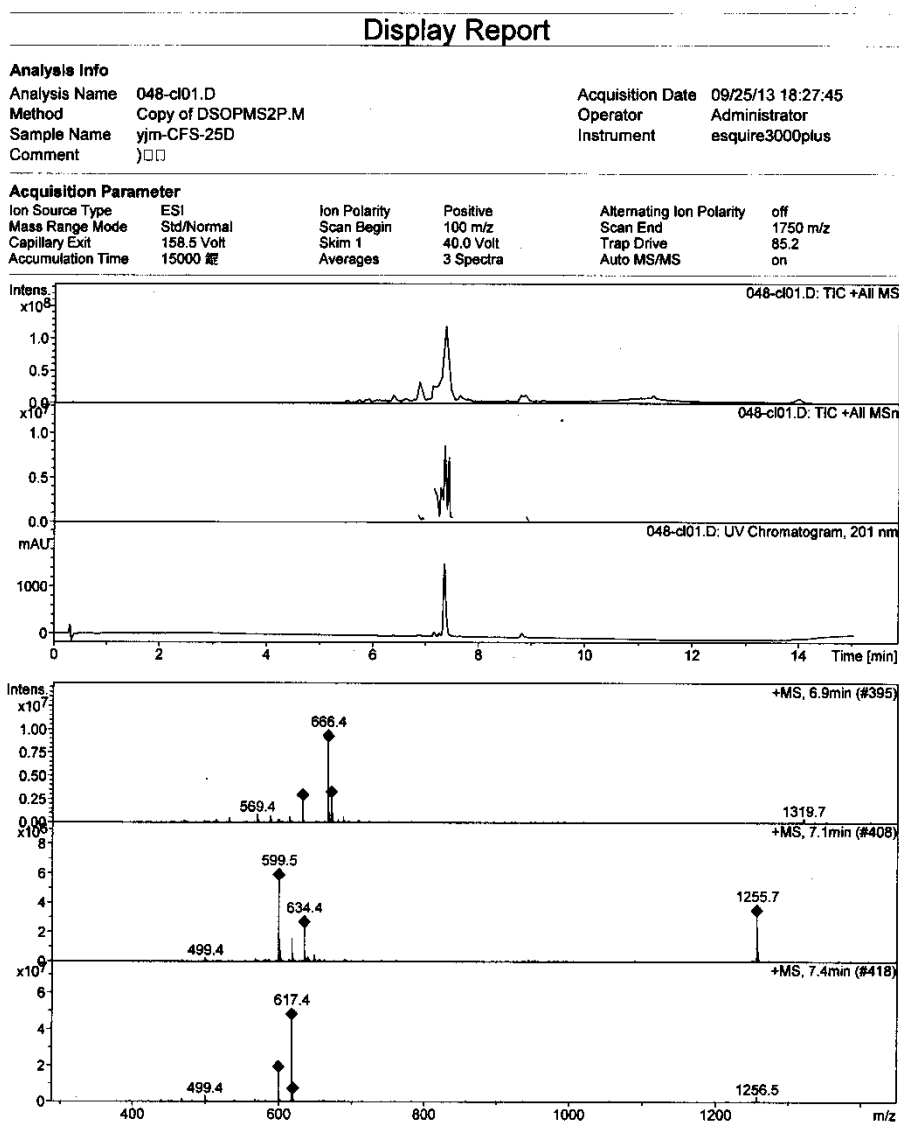

Figure S98. (-)-ESIMS spectrum of fortunilide K (11)

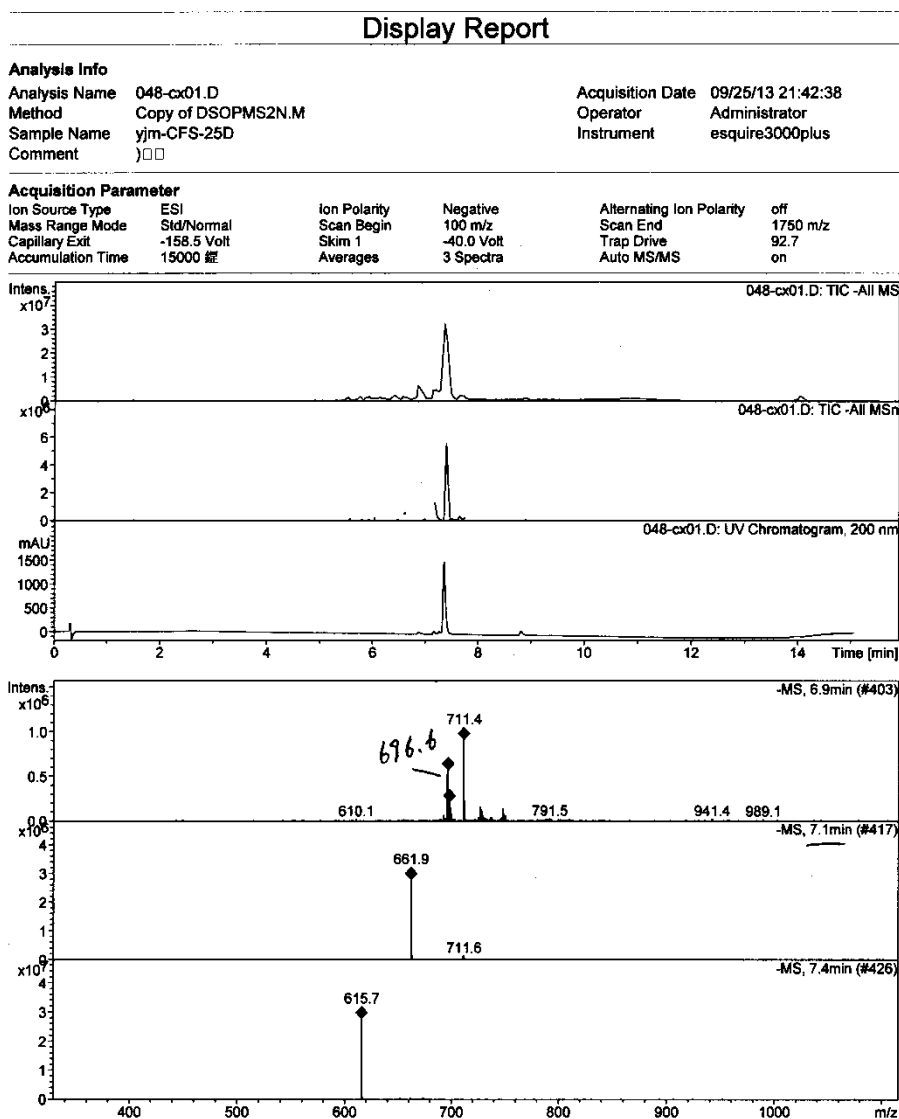

Figure S99. (+)-HRESIMS spectrum of fortunilide K (11)

Elemental Composition Report

Single Mass Analysis

Tolerance = 10.0 PPM / DBE: min = -1.5, max = 50.0

Element prediction: Off

Number of isotope peaks used for i-FIT = 3

Monoisotopic Mass, Even Electron Ions

130 formula(e) evaluated with 2 results within limits (up to 50 closest results for each mass)

Elements Used:

C: 5-80 H: 2-120 O: 0-20

CFS-25D

LCT PXE KE324

27-Sep-2013

10:26:44

CFS-25D\_0927 24 (0.528) AM2 (Ar,10000.0,0.00,1.00); ABS: Cm (18:32)

1: TOF MS ES-

1.28e+004

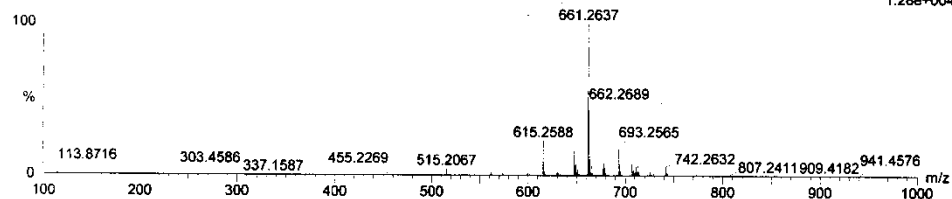

Minimum: -1.5  
Maximum: 3.0 10.0 50.0

| Mass     | Calc. Mass | mDa  | PPM  | DBE  | i-FIT | i-FIT (Norm) | Formula    |
|----------|------------|------|------|------|-------|--------------|------------|
| 615.2588 | 615.2594   | -0.6 | -1.0 | 17.5 | 50.6  | 0.2          | C36 H39 O9 |
|          | 615.2535   | 5.3  | 8.6  | 26.5 | 52.4  | 2.0          | C43 H35 O4 |



Figure S100. IR spectrum of fortunilide K (11)

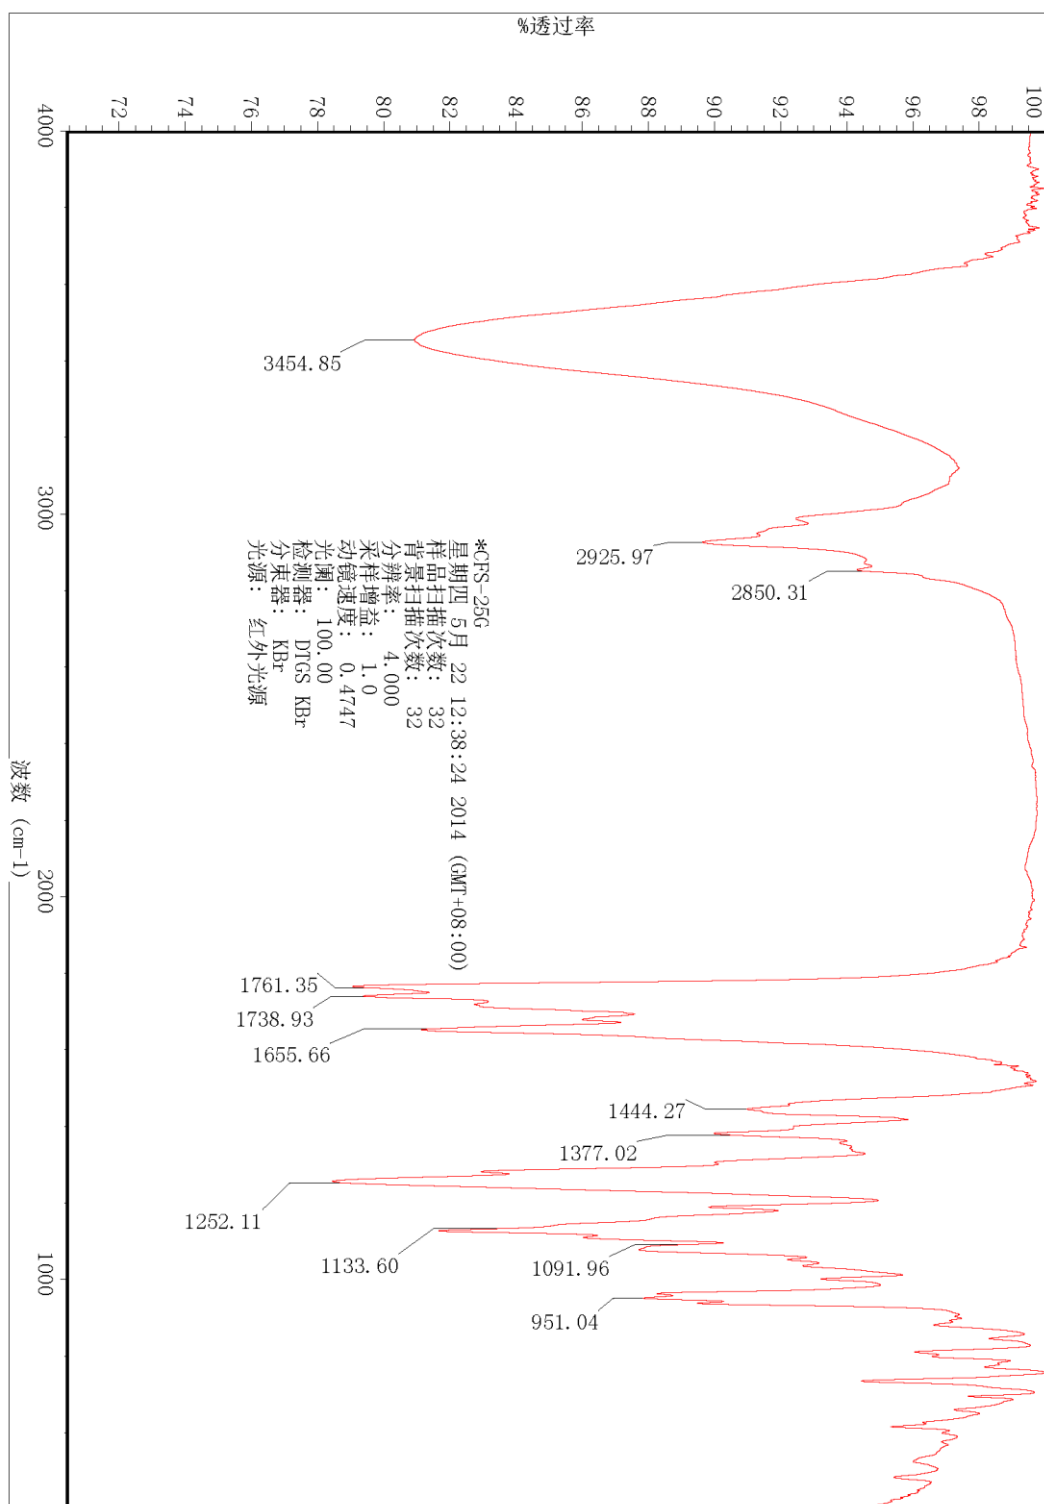

Figure S101. <sup>1</sup>H NMR spectrum of fortunilide L (12) in CDCl<sub>3</sub>

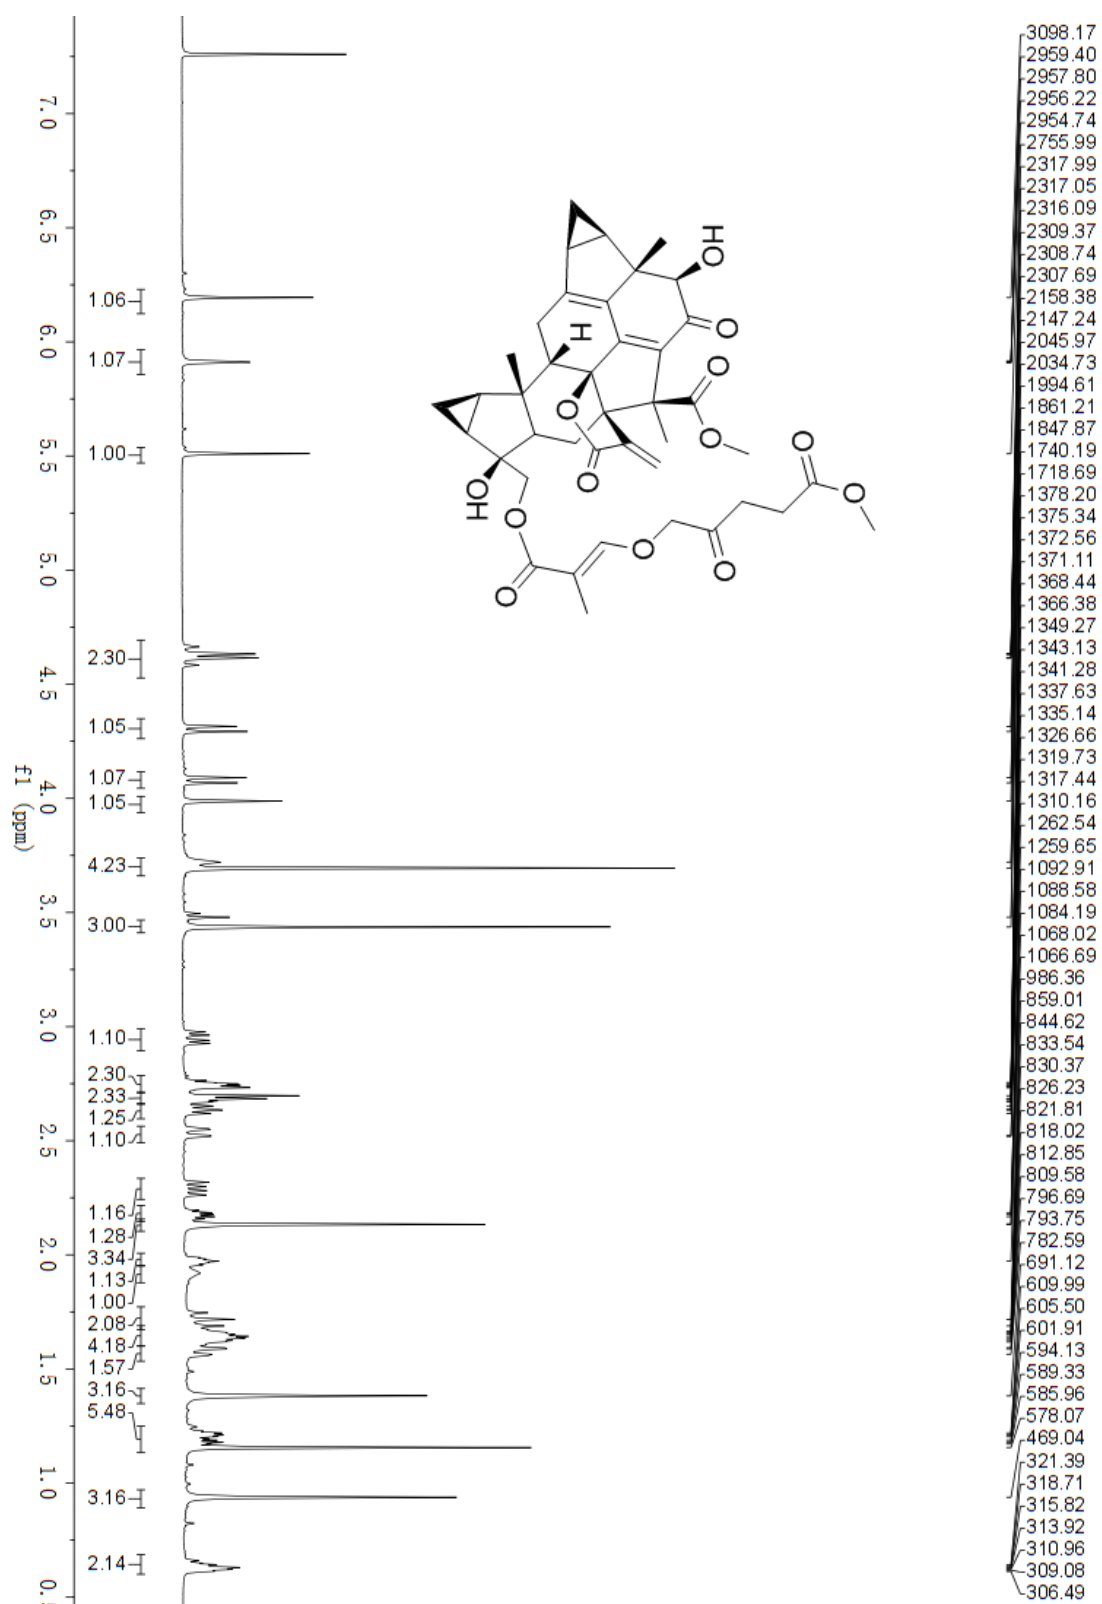

Figure S102.  $^{13}\text{C}$  NMR spectrum of fortunilide L (12) in  $\text{CDCl}_3$

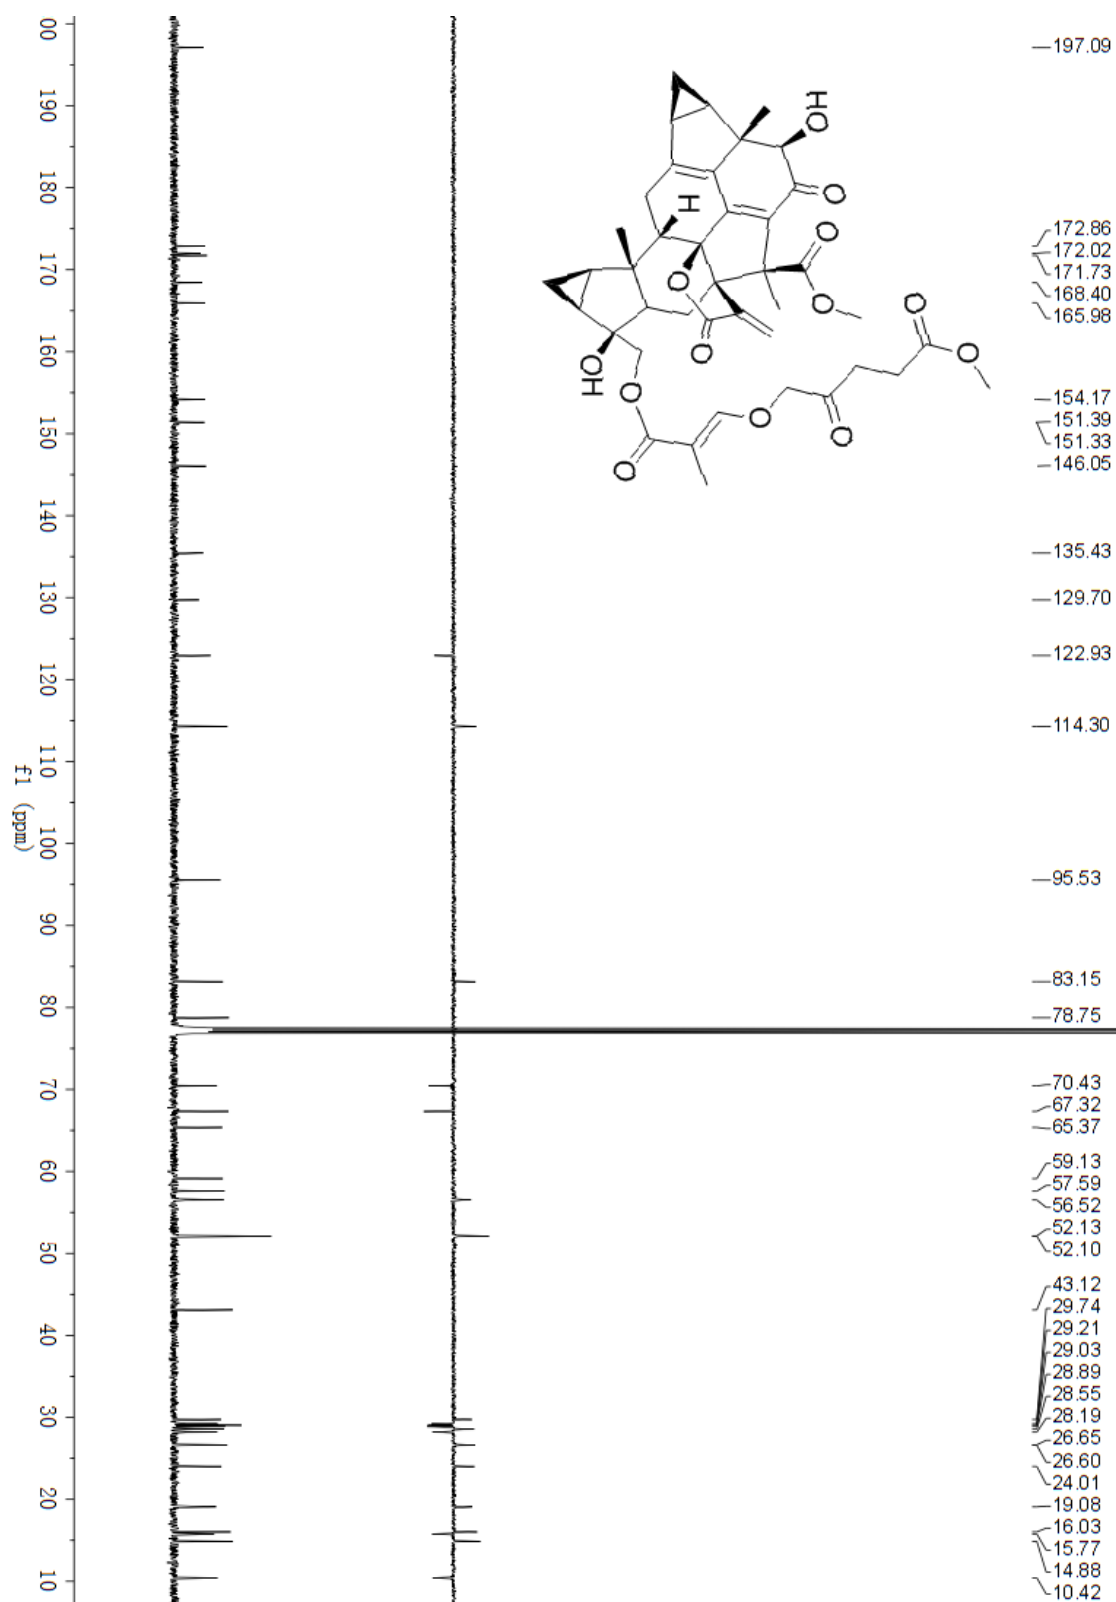

Figure S103. HSQC spectrum of fortunilide L (12) in CDCl<sub>3</sub>

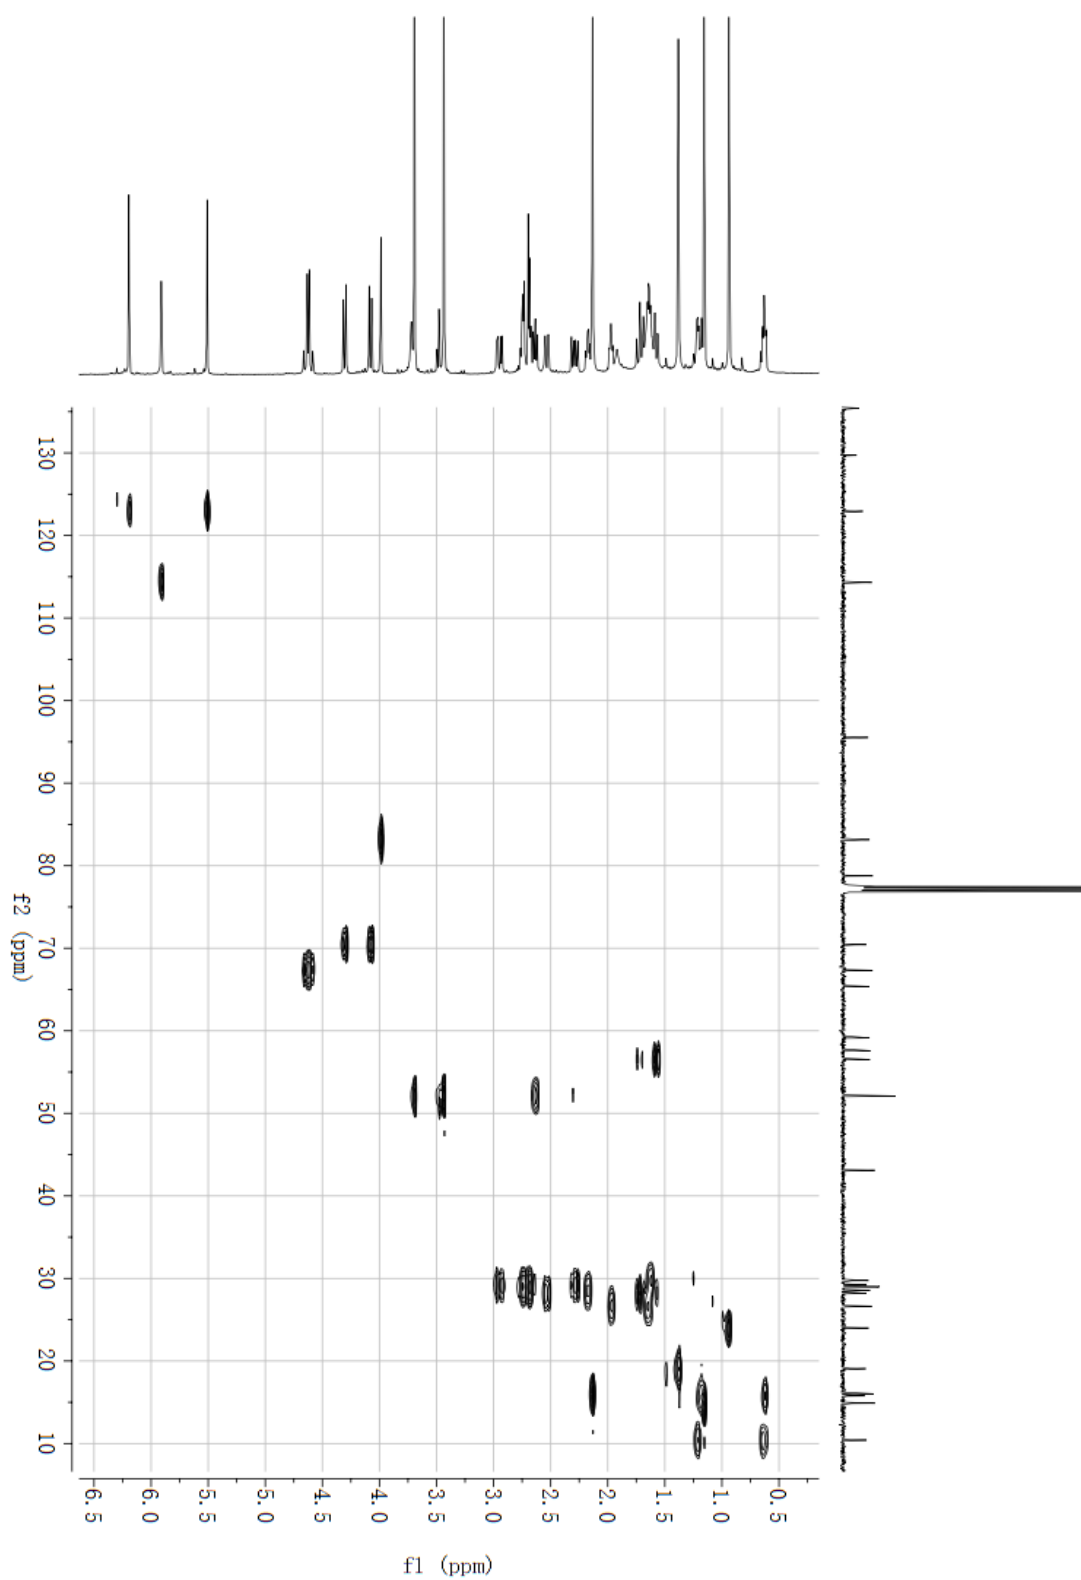

Figure S104. HMBC spectrum of fortunilid L (12) in CDCl<sub>3</sub>

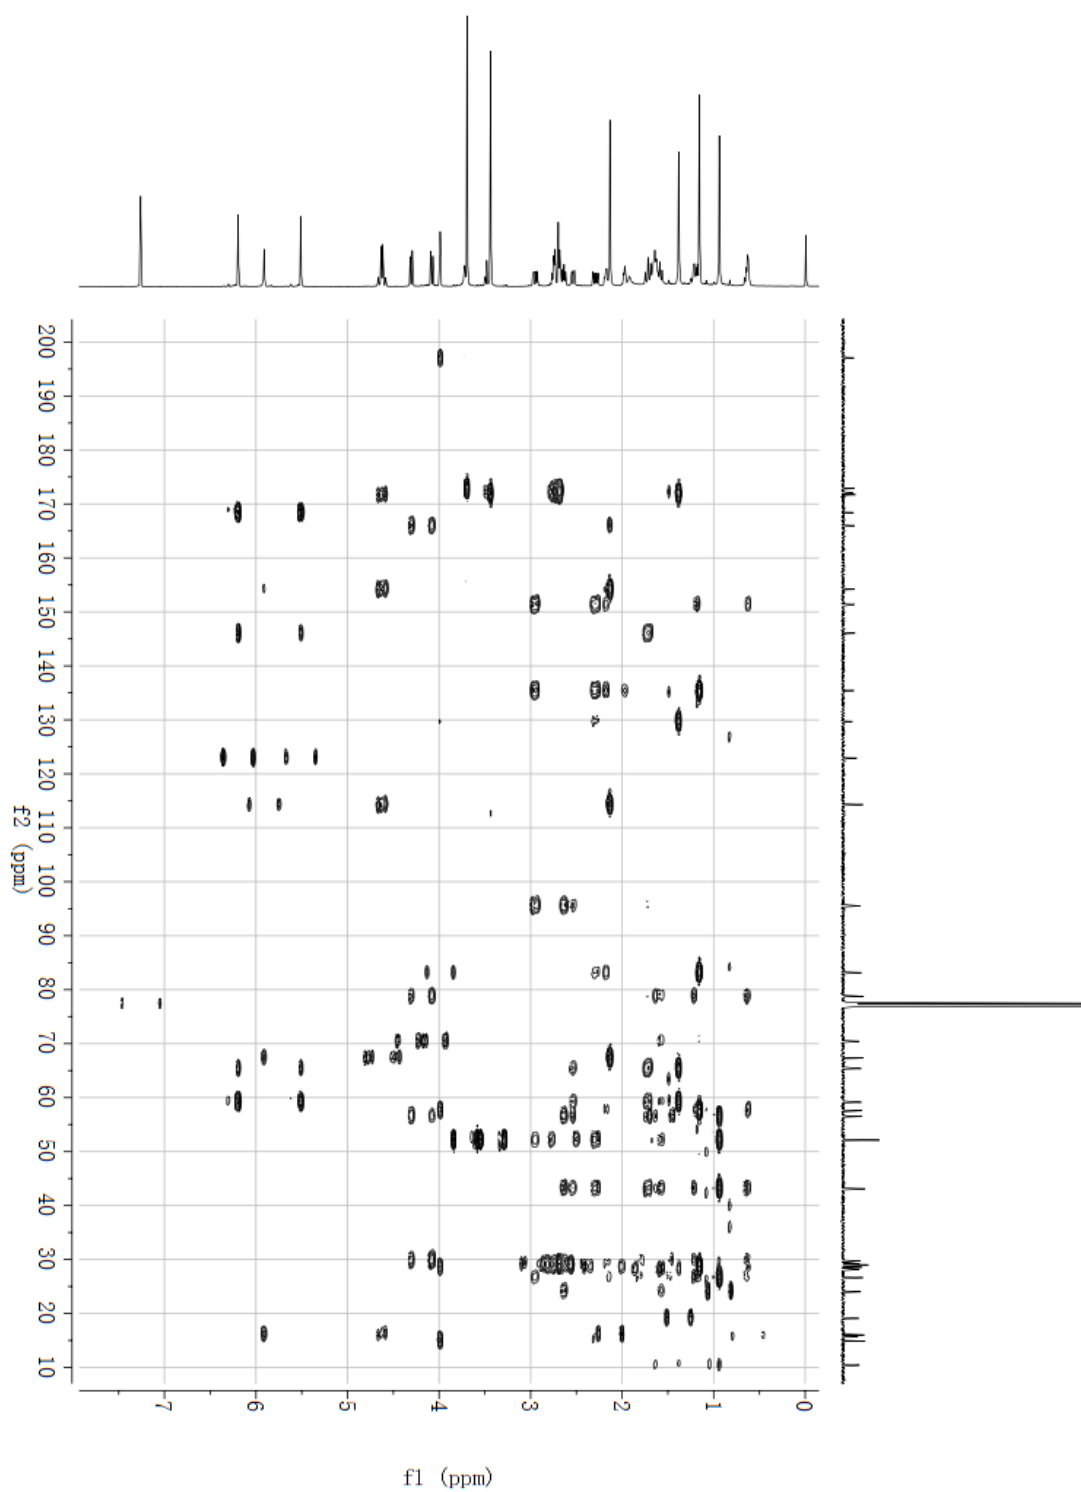

Figure S105. ROESY spectrum of fortunilide L (12)

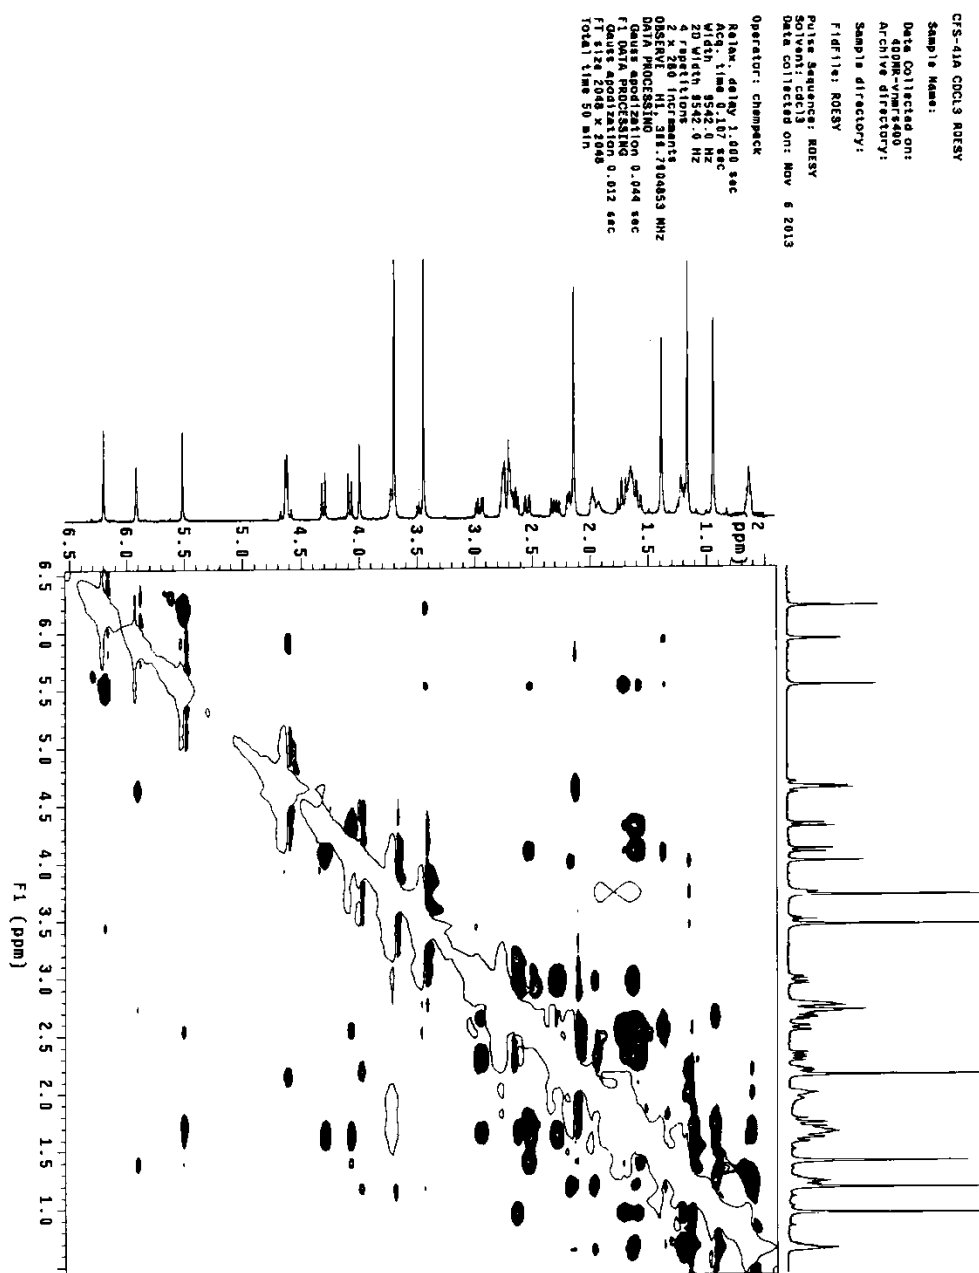

Figure S106. (+)-ESIMS spectrum of fortunilide L (12)

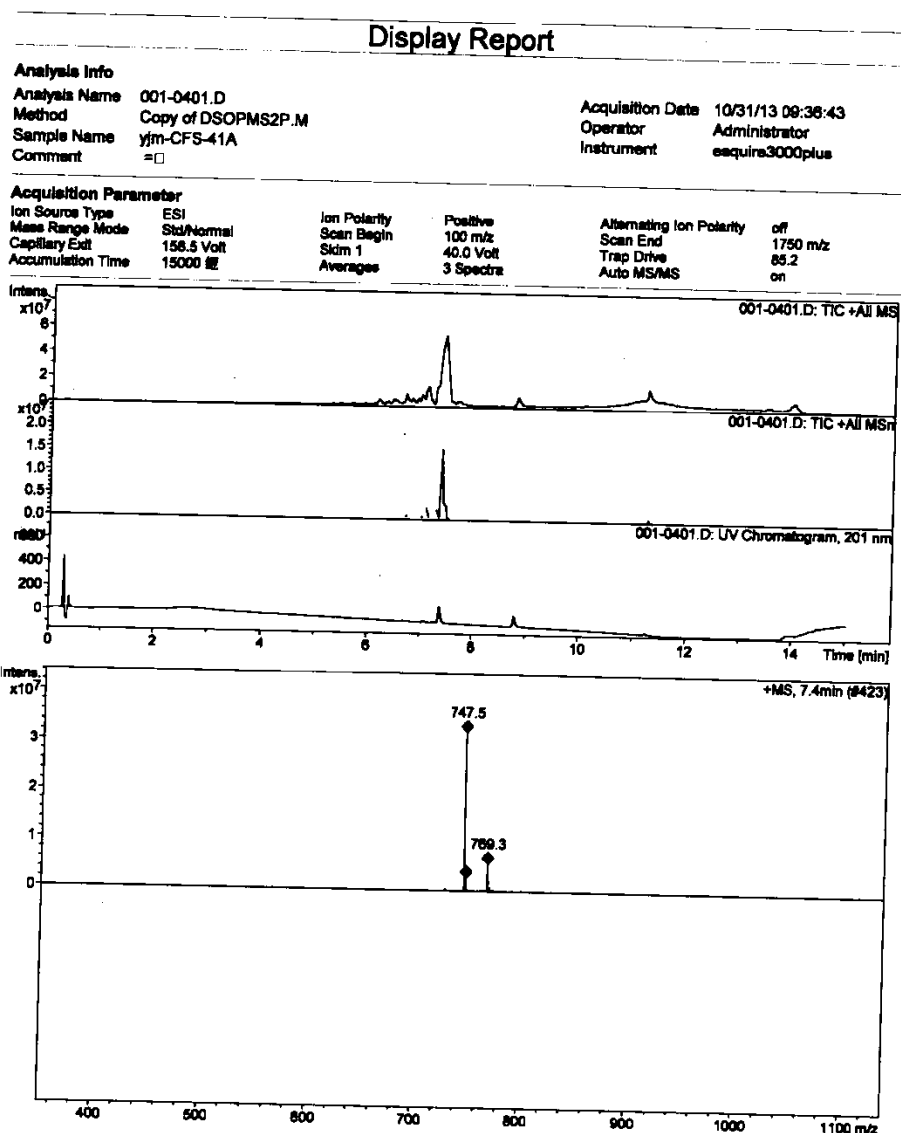

Figure S107. (-)-ESIMS spectrum of fortunilide L (12)

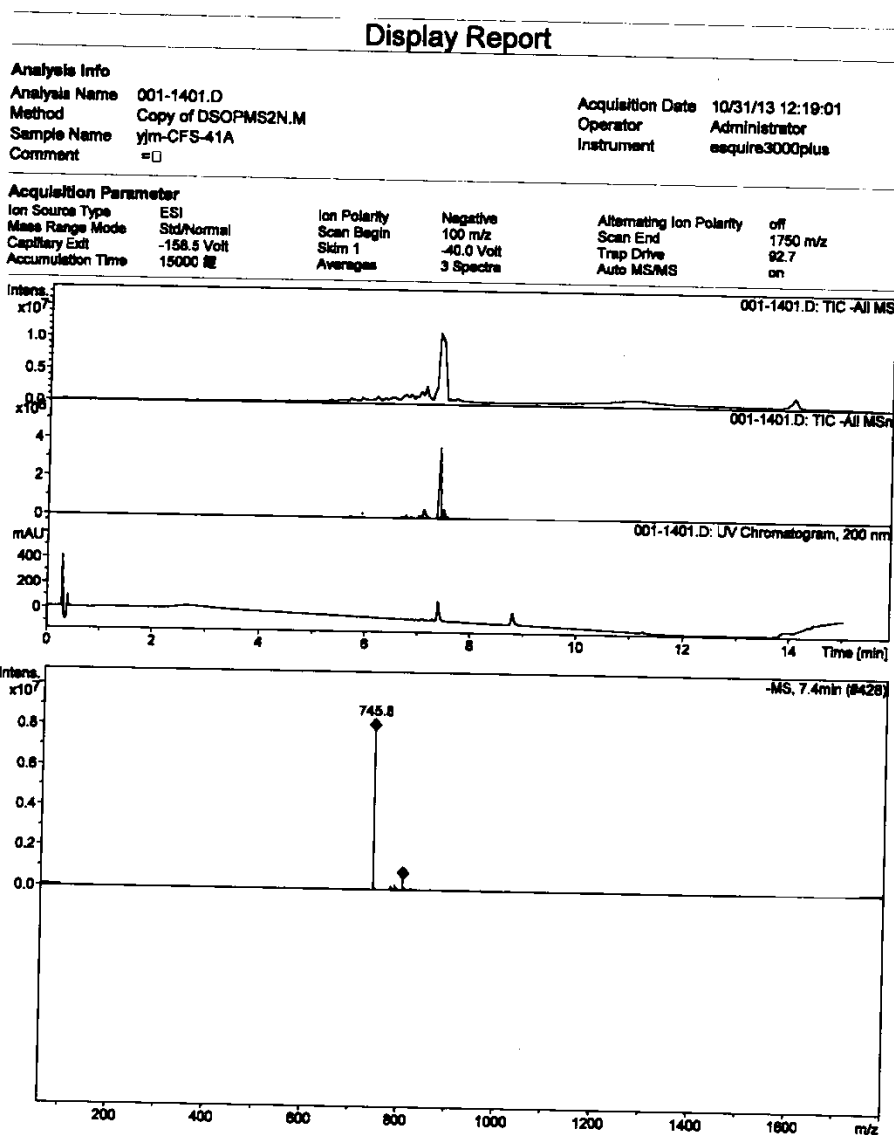



Figure S108. (+)-HRESIMS spectrum of fortunilide L (12)

Elemental Composition Report

Page 1

Single Mass Analysis

Tolerance = 3.0 PPM / DBE: min = -1.5, max = 50.0

Element prediction: Off

Number of isotope peaks used for i-FIT = 3

Monoisotopic Mass, Even Electron Ions

328 formula(e) evaluated with 1 results within limits (up to 50 closest results for each mass)

Elements Used:

C: 5-80 H: 2-120 O: 0-20 Na: 0-1

CFS-41A

LCT PXE KE324

31-Oct-2013

14:55:33

1: TOF MS ES+

5.10e+004

CFS-41A\_1031 30 (0.837) AM2 (Ar,10500,0,0,00,0.70); ABS; Cm (14:33)

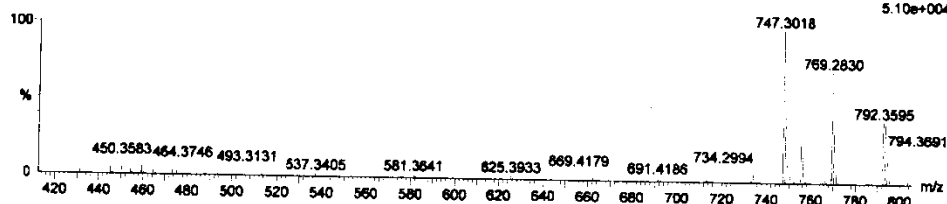

Minimum:

Maximum: 5.0 3.0 -1.5

Mass Calc. Mass mDa PPM DBE i-FIT i-FIT (Norm) Formula

| Mass     | Calc. Mass | mDa  | PPM  | DBE  | i-FIT | i-FIT (Norm) | Formula        |
|----------|------------|------|------|------|-------|--------------|----------------|
| 769.2830 | 769.2836   | -0.6 | -0.8 | 18.5 | 86.9  | 0.0          | C41 H46 O13 Na |

Figure S109. IR spectrum of fortunilide L (12)

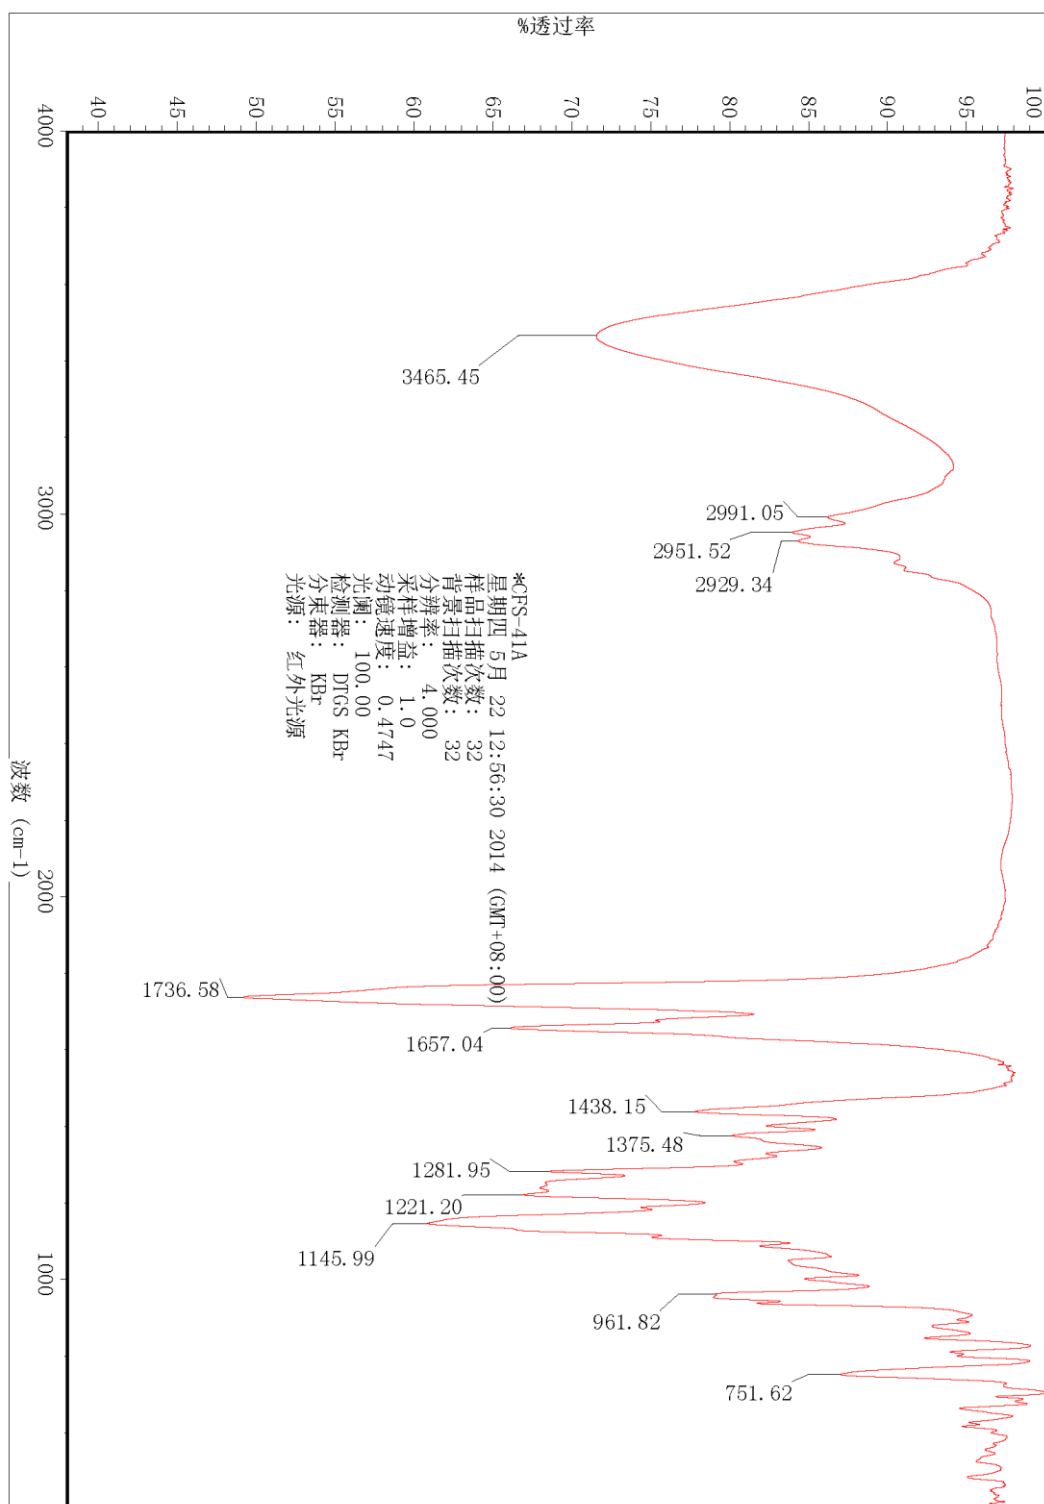

Supplement: NIHMS849198-supplement-SI.pdf [file NIHMS849198-supplement-SI.pdf]
